# Supplementary material for: Severe varicose veins and the risk of mortality: a nationwide population-based cohort study
Source: PubMed Central journal article supplement — BMJ Open. 2020 Jun 21;10(6):e034245. doi: 10.1136/bmjopen-2019-034245 (PMC7311034; doi:10.1136/bmjopen-2019-034245), 2020-06-21
Supplement: bmjopen-2019-034245.draft_revisions.pdf [file bmjopen-2019-034245.draft_revisions.pdf]

# BMJ Open

BMJ Open is committed to open peer review. As part of this commitment we make the peer review history of every article we publish publicly available.

When an article is published we post the peer reviewers' comments and the authors' responses online. We also post the versions of the paper that were used during peer review. These are the versions that the peer review comments apply to.

The versions of the paper that follow are the versions that were submitted during the peer review process. They are not the versions of record or the final published versions. They should not be cited or distributed as the published version of this manuscript.

BMJ Open is an open access journal and the full, final, typeset and author-corrected version of record of the manuscript is available on our site with no access controls, subscription charges or pay-per-view fees (<http://bmjopen.bmj.com>).

If you have any questions on BMJ Open's open peer review process please email [info.bmjopen@bmj.com](mailto:info.bmjopen@bmj.com)

# BMJ Open

## Varicose Veins are Associated with Mortality and Cardiovascular Events: A Nationwide Cohort Study

|                               |                                                                                                                                                                                                                                                            |
|-------------------------------|------------------------------------------------------------------------------------------------------------------------------------------------------------------------------------------------------------------------------------------------------------|
| Journal:                      | <i>BMJ Open</i>                                                                                                                                                                                                                                            |
| Manuscript ID                 | bmjopen-2019-034245                                                                                                                                                                                                                                        |
| Article Type:                 | Original research                                                                                                                                                                                                                                          |
| Date Submitted by the Author: | 12-Sep-2019                                                                                                                                                                                                                                                |
| Complete List of Authors:     | Wu, Nan-Chun<br>Chen, Zhih-Cherng<br>Feng, I-Jung<br>Ho, Chung-Han; Chi Mei Medical Center, Medical Research<br>Chiang, Chun-Yen<br>Wang, Jhi-Joung<br>Chang, Wei-Ting; Chi Mei Medical Center, Division of Cardiology,<br>Department of Internal Medicine |
| Keywords:                     | varicose vein, mortality, sex, age, cardiovascular risk                                                                                                                                                                                                    |
|                               |                                                                                                                                                                                                                                                            |

SCHOLARONE™  
Manuscripts

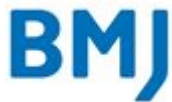

I, the Submitting Author has the right to grant and does grant on behalf of all authors of the Work (as defined in the below author licence), an exclusive licence and/or a non-exclusive licence for contributions from authors who are: i) UK Crown employees; ii) where BMJ has agreed a CC-BY licence shall apply, and/or iii) in accordance with the terms applicable for US Federal Government officers or employees acting as part of their official duties; on a worldwide, perpetual, irrevocable, royalty-free basis to BMJ Publishing Group Ltd ("BMJ") its licensees and where the relevant Journal is co-owned by BMJ to the co-owners of the Journal, to publish the Work in this journal and any other BMJ products and to exploit all rights, as set out in our [licence](#).

The Submitting Author accepts and understands that any supply made under these terms is made by BMJ to the Submitting Author unless you are acting as an employee on behalf of your employer or a postgraduate student of an affiliated institution which is paying any applicable article publishing charge ("APC") for Open Access articles. Where the Submitting Author wishes to make the Work available on an Open Access basis (and intends to pay the relevant APC), the terms of reuse of such Open Access shall be governed by a Creative Commons licence – details of these licences and which [Creative Commons](#) licence will apply to this Work are set out in our licence referred to above.

Other than as permitted in any relevant BMJ Author's Self Archiving Policies, I confirm this Work has not been accepted for publication elsewhere, is not being considered for publication elsewhere and does not duplicate material already published. I confirm all authors consent to publication of this Work and authorise the granting of this licence.

1  
2  
3  
4 **Varicose veins are associated with mortality and cardiovascular events: A nationwide**  
5  
6 **cohort study**  
7

8 Nan-Chun Wu<sup>1,2\*</sup>; Zhih-Cherng Chen<sup>3,4\*</sup>; I-Jung Feng<sup>5</sup>; Chung-Han Ho<sup>5</sup>; Chun-Yen Chiang<sup>3</sup>;  
9  
10 Jhi-Joung Wang<sup>6</sup>; Wei-Ting Chang<sup>3,7</sup>  
11  
12

13 **Short title:** Outcomes of Varicose Veins  
14

15 <sup>1</sup> Department of Cardiovascular Surgery, Chi Mei Medical Center, Tainan, Taiwan  
16

17 <sup>2</sup> Department of Hospital and Health Care Administration, Biotechnology, Chia-Nan University  
18  
19 of Pharmacy and Science, Tainan, Taiwan  
20

21 <sup>3</sup> Department of Cardiology, Chi Mei Medical Center, Tainan, Taiwan  
22

23 <sup>4</sup> Department of Pharmacy, Chia Nan University of Pharmacy and Science, Tainan City, Taiwan  
24

25 <sup>5</sup> Department of Healthcare Administration and Medical Informatics, Chi Mei Medical Center,  
26  
27 Tainan, Taiwan  
28

29 <sup>6</sup> Department of Medical Research, Chi Mei Medical Center, Tainan, Taiwan  
30

31 <sup>7</sup> Department of Biotechnology, Southern Taiwan University of Science and Technology, Tainan  
32  
33 710, Taiwan  
34

35  
36  
37  
38 \* Nan-Chun Wu and Zhih-Cherng Chen contributed to this article equally  
39

40  
41 **Address for correspondence:** Wei-Ting Chang, MD,  
42

43 901, Zhonghua Road, Yongkang District, Tainan, Taiwan (R.O.C.)  
44

45 Tel: +886-281-2811; Fax: +886-281-2811; E-mail: cmcvecho2@gmail.com  
46

47  
48 **Word count of the Abstract:** 238 words  
49

50 **Word count of the text:** 2936 words  
51  
52  
53  
54  
55

### Strengths and limitations of this study

1. The strengths of this study are its population-based design with a large sample size including study and control cohorts.
2. Also, our novel findings indicated that the presence of varicose vein should catch more awareness of potential co-existing risks of mortality and major cardiac adverse events.
3. However, all insurance claims should be reviewed by medical reimbursement specialists. Some risk factors of varicose vein including smoking habits, lack of movement, age, sex, pregnancy history, overweight and glycated hemoglobin levels were not available in this database.

## Abstract

**Objective:** Varicose veins (VV) are common and although considered benign may cause morbidity. Moreover, their potential threat to health is considered to be low. However, the association between VV severity and cardiovascular and mortality risks remains unknown. The aim of this study was to investigate the factors associated with overall mortality in patients with VV.

**Setting:** Population-based cohort study

**Participants:** A total of 4807 patients with newly diagnosed VV between 1999 and 2012 were identified from Taiwan's National Health Insurance Database. Moreover, 38,456 age-, sex-, and chronic cardiovascular risk factor-matched controls, as assessed based on propensity score, were included.

**Primary and secondary outcome measures:** Enrolled patients were analyzed using conditional Cox proportional hazards regression analysis to estimate risk of mortality and major cardiovascular adverse events (MACE) in the VV and control groups. VV severity was classified from grade I to III according to the presentation of ulcers or inflammation. The MACE risk associated with each VV severity grade was calculated using the control group as a reference.

**Results:** Most patients with VV were free from systemic disease. However, compared with matched controls, patients with VV showed a 1.26-times increased risk of mortality (adjusted hazard ratio [HR]: 1.26; 95% CI 1.10–1.46;  $p = 0.0012$ ). Compared with matched controls, younger (age <65 years) (HR: 1.65; 95% CI: 1.25–2.17;  $p = 0.0004$ ) and male patients with VV (HR: 1.42; 95% CI: 1.17–1.72;  $p = 0.0004$ ) showed increased risk of mortality. Furthermore, MACE risk increased with VV severity. Compared with controls, patients with grades I, II, and III VV showed 26.12-, 48.79-, and 61.79-times increased risks of venous thrombotic events,

1  
2  
3  
4 respectively, including deep vein thrombosis and pulmonary embolism.  
5

6 **Conclusions:** This nationwide cohort study demonstrated that patients with VV are at a risk of  
7 cardiovascular events and mortality. Our findings suggest that presence of VV warrants close  
8 attention in terms of prognosis and treatment.  
9  
10  
11  
12

13 **Key words:** varicose vein, mortality, sex, age, cardiovascular risk  
14  
15  
16  
17  
18  
19  
20  
21  
22  
23  
24  
25  
26  
27  
28  
29  
30  
31  
32  
33  
34  
35  
36  
37  
38  
39  
40  
41  
42  
43  
44  
45  
46  
47  
48  
49  
50  
51  
52  
53  
54  
55  
56  
57  
58  
59  
60

## Introduction

Varicose veins (VV) can be considered a common disease with prevalence ranging from 2% to 56% in the adult population.<sup>1</sup> Following clinical examination, VV diagnosis is primarily based on the presence of enlarged and twisted veins in the lower extremities.<sup>1,2</sup> Among people with VV, 1% to 4% of individuals show higher severity grades (Clinical–Etiological–Anatomical–Pathophysiological [CEAP] classification, 5–6).<sup>1,2</sup> Although VV lead to leg swelling, venous eczema, and ulceration in some cases, they are regarded as a benign disease.<sup>3,4</sup> Moreover, the association between the severity of VV and risk of future adverse events remains unknown. In fact, the majority of the previous studies have focused on the importance of superficial venous thrombosis or deep vein thrombosis (DVT).<sup>5</sup> In a 30-year cohort study, mortality risk among patients with DVT and pulmonary embolism (PE) was markedly higher than that in age and sex-matched patients, particularly within the first 30 days.<sup>6</sup> Similarly, another population-based case-control study demonstrated that having VV was a risk factor for venous thromboembolism, although the association of VV severity with survival and cardiovascular events remains unknown.<sup>7</sup> In addition, although age, family history, and female sex are the known risk factors for VV, the effects of underlying diseases or sex on outcomes of VV remain unclear.<sup>1</sup> We hypothesized that presence of VV can be used as a marker for cardiovascular risk. Therefore, the aim of this study was to investigate the association of VV with survival and cardiovascular outcomes.

## Methods

### *Data Source*

Taiwan launched a single-payer National Health Insurance (NHI) program on March 1,



1  
2  
3  
4 1995. This database contains details of almost every Taiwanese resident (coverage rate >98% in  
5  
6 2009), making it one of the world's largest and most complete population-based sources. The  
7  
8 data used in this study were retrieved from the Longitudinal Health Insurance Database 2000  
9  
10 (LHID2000)—a subset of the NHI database containing all claims data from 1996 to 2013,  
11  
12 covering 1 million beneficiaries randomly selected in 2000. At that time, there were no  
13  
14 significant differences in age, sex, and health care costs between patients with VV and matched  
15  
16 controls. LHID2000 provided encrypted patient identification numbers; sex; date of birth;  
17  
18 admission and discharge dates; International Classification of Diseases, Ninth Revision, Clinical  
19  
20 Modification (ICD-9-CM) codes of diagnoses and procedures; prescription details; registry data  
21  
22 in the Catastrophic Illness Patient Database; and costs covered and paid for by NHI. Details of  
23  
24 the National Health Insurance Research Databases (NHIRD) are described in previous studies.<sup>8,9</sup>  
25  
26 Moreover, the accuracy of major disease diagnoses in the NHIRD, including stroke and acute  
27  
28 coronary syndrome, has been validated.<sup>9</sup> The present study was ethically approved by the  
29  
30 Institutional Review Board of Chi-Mei Hospital (CV code: 10406-E01). All procedures followed  
31  
32 the principles outlined in the Declaration of Helsinki.  
33  
34  
35  
36  
37

### 38 *Study Design*

39  
40  
41 This nationwide population-based, retrospective cohort study was conducted to investigate  
42  
43 the association between VV and subsequent mortality. Patients with at least 3 claims for  
44  
45 outpatient VV diagnosis in 1 year or with 1 claim for inpatient VV diagnosis (ICD-9-CM codes  
46  
47 454, 454.0, 454.1, 454.2, 454.8, and 454.9) were considered as VV cases. Patients with a first-  
48  
49 time diagnosis of VV from January 1999 to December 2012 were included in the cohort. Codes  
50  
51 for VV were considered reliable for diagnosis based on clinical symptoms. VV was mainly  
52  
53 diagnosed based vascular duplex and the judgement of clinical specialists. The date of the first-  
54  
55  
56  
57  
58  
59  
60

1  
2  
3  
4 time VV diagnosis was considered the index date in this study. To ensure accurate VV diagnosis,  
5  
6 and to avoid potentially confounding effects, patients with DVT (ICD-9-CM codes 453.40,  
7  
8 459.1, 671.4, 671.3, 451.83, 459.3, 453.4, and 451.11) or PE (ICD-9-CM codes 415.1, 415.11,  
9  
10 673, 673.2, and 673.8) in an ambulatory setting before the index date were excluded. In addition,  
11  
12 VV severity was categorized as grade I uncomplicated (ICD-9-CM code 454.9), grade II with  
13  
14 ulcer (ICD-9-CM code 454.0) or inflammation (ICD-9-CM code 454.1), and grade III with both  
15  
16 ulcer and inflammation (ICD-9-CM code 454.2).  
17  
18

19  
20 The control cohort (n = 38,456; 8 control subjects for every enrolled patient with VV)  
21  
22 comprised selected patients who were not diagnosed with VV from 1996 to 2013. To eliminate  
23  
24 potential selection bias, the controls were selected using propensity score matching for baseline  
25  
26 characteristics of age, sex, and chronic cardiovascular risk factors, including hypertension (ICD-  
27  
28 9-CM codes 401–405, A260, A269, 4372), diabetes (ICD-9-CM codes 250, A181, A189, A229,  
29  
30 A239, 3572, and 3620), hyperlipidemia (ICD-9-CM code 272), and coronary artery disease  
31  
32 (CAD; ICD-9-CM codes 410–414). The propensity scores for identified VV cases and controls  
33  
34 were estimated using the fitting logistic regression model. Based on greedy algorithm matching,  
35  
36 8 control subjects (the nearest neighbor matching of VV) were selected as matched controls.<sup>10</sup> If  
37  
38 a case failed to be assigned to the 8 matched controls, it was dropped from the set of matches. In  
39  
40 addition, since the primary VV treatment was covered by insurance, it prevented VV  
41  
42 overdiagnosis. The matched controls were assigned the same index date as that of the  
43  
44 corresponding VV patient.  
45  
46  
47  
48  
49

### 50 *Outcomes*

51  
52 The primary outcome was mortality, and the secondary outcome was major cardiovascular  
53  
54 adverse events (MACEs), including acute coronary syndrome (ACS, ICD-9-CM codes 410,  
55  
56

1  
2  
3  
4 410.7, 411.1, 411.81, and 414.8), congestive heart failure (CHF, ICD-9-CM codes 428, 428.0,  
5 428.1, 428.2, and 428.9), ischemic stroke (ICD-9-CM code 436), DVT, and PE. Mortality was  
6 identified using the “in-hospital death” or “discharge under critical condition” codes at  
7 discharge. Enrollment in the NHI program is mandatory for all people in Taiwan, and  
8 registration must be withdrawn within 30 days after death. Patients with the abovementioned  
9 mortality-related codes and those withdrawn from the NHI program within 30 days after  
10 discharge from the last hospitalization were presumed to have died. All subjects were followed  
11 up from the index date to death (lost to follow-up) or until December 31, 2013, whichever was  
12 earlier.  
13  
14  
15  
16  
17  
18  
19  
20  
21  
22  
23

#### 24 *Validation of the Accuracy of VV Diagnosis and CEAP Grading*

25  
26  
27 To validate the accuracy of the VV diagnosis, we reviewed the charts of all patients  
28 (inpatients and outpatients) using ICD-9-CM diagnosis codes for VV who visited Chi-Mei  
29 Medical Center (Tainan, Taiwan) from 2010 to 2015. Our aim was to determine the accuracy of  
30 code usage. A vascular specialist reviewed patient discharge and clinical records. In addition to  
31 examining the accuracy of VV diagnosis, the reviewer compared CEAP stages with our ICD-9-  
32 CM-derived grades in inpatients. Subsequently, we further investigated the sensitivity,  
33 specificity, and predictive value of the ICD codes for clinical diagnosis, as well as the  
34 applicability of our VV grading system. In particular, as ICD-9-CM coding and VV descriptions  
35 are associated with insurance payment, the accuracy of VV diagnosis and the reliability of VV  
36 severity grading increased.  
37  
38  
39  
40  
41  
42  
43  
44  
45  
46  
47  
48

#### 49 *Statistical Analyses*

50  
51  
52 Continuous and categorical baseline characteristics between the case and control groups  
53 were separately compared using Student’s *t*-test and chi-square test or Fisher’s exact test, as  
54  
55

1  
2  
3  
4 appropriate. Comparisons among disease severities were evaluated by one-way ANOVA and  
5  
6 chi-square test for continuous and categorical data.  
7

8  
9 Conditional Cox proportional hazards regression analysis was used to estimate the risk of  
10 mortality and MACE in the VV and control groups. Adjusted hazard ratios (HRs) were estimated  
11 by adjusting for age, sex, hypertension, diabetes, hyperlipidemia, and CAD. Moreover, the  
12 investigation was extended to stratified subgroup analysis. HRs between the VV and control  
13 groups were separately estimated in subgroups of population aged <65 years or >65 years; males  
14 or females; and subgroups with or without a diagnosis of hypertension, diabetes, hyperlipidemia,  
15 or CAD. The Kaplan-Meier method was used to separately estimate the 3-, 6-, and 9-year  
16 survival rates in the control and VV groups. Kaplan-Meier curves of mortality and MACE were  
17 plotted for controls and patients with 3 grades of VV severity. Differences in survival curves  
18 between the control and VV groups were examined using the log-rank test. A two-tailed p value  
19 of <0.05 was considered statistically significant. All analyses were performed using the SAS  
20 software, version 9.4 (SAS Institute, Cary, NC).  
21  
22  
23  
24  
25  
26  
27  
28  
29  
30  
31  
32  
33  
34  
35  
36  
37  
38

## 39 **Results**

### 40 *Characteristics of the Study Population*

41  
42 A total of 4807 patients with newly diagnosed VV were identified during January 1999 to  
43 December 2012. Moreover, 38,456 age-, sex-, and chronic disease-matched patients without VV  
44 were enrolled for comparison. All patients were tracked from the index dates until achieving the  
45 primary outcomes or the end of the study. The mean age of patients with VV was  $56.27 \pm 16.13$   
46 years, the majority of the patients were female (60.54%), and most of them did not present with  
47 chronic diseases such as hypertension, diabetes, hyperlipidemia, and CAD (Table 1). Patients  
48  
49  
50  
51  
52  
53  
54  
55  
56  
57  
58  
59  
60

1  
2  
3  
4 with grade III VV showed significantly different distribution of age (aged  $\geq 55$  years), sex,  
5  
6 hypertension, and diabetes (Table 2). Interestingly, more female patients (67.88%) were  
7  
8 diagnosed with a lower severity (grade I).  
9

### 10 11 *Long-Term Mortality Risk*

12  
13 Compared with matched controls, the outcomes of patients with VV were worse. The estimated  
14  
15 survival at 3, 6, and 9 years were 97.7%, 95.6%, and 93.3%, respectively, in patients with VV  
16  
17 compared with 98.3%, 96.6%, and 94.6%, respectively, in controls (Figure 1A). A log-rank test  
18  
19 revealed a significant difference in survival curves of patients with VV and controls ( $p =$   
20  
21 0.0008). The survival curves of controls and patients with different severities of VV are  
22  
23 presented in Figure 1B. Lower survival rates over time were observed in patients with higher VV  
24  
25 severity grades (II–III) but not in those with grade I. Subsequent post-hoc analysis with  
26  
27 Bonferroni correction revealed that the survival curves of patients with higher VV severity  
28  
29 grades (II–III) were significantly different (grade II:  $p = 0.004$ ; grade III:  $p < 0.0001$ ) from the  
30  
31 survival curves of controls. However, there was no significant difference in the survival curves  
32  
33 of patients with grade I VV and controls ( $p > 0.9999$ ).  
34  
35  
36  
37

38  
39 Overall, HR of all-cause mortality adjusted for age, sex, and cardiovascular risks in patients with  
40  
41 VV was 1.26 times higher (adjusted HR: 1.26; 95% CI: 1.10–1.46;  $p = 0.0012$ ) than that in  
42  
43 controls (Table 3). Stratified analysis revealed 1.65- and 1.42-times increased risks of mortality  
44  
45 in younger (age  $< 65$  years; adjusted HR: 1.65; 95% CI: 1.25–2.17;  $p = 0.0004$ ) and male patients  
46  
47 with VV (adjusted HR: 1.42; 95% CI: 1.17–1.47;  $p = 0.0004$ ). However, no significant effect of  
48  
49 VV was found on the survival of patients with specific concomitant cardiovascular risks.  
50  
51

### 52 53 *Long-Term MACE risk*

54  
55 MACE risk significantly increased in patients with VV (adjusted HR: 1.94; 95% CI: 1.79–

1  
2  
3  
4 2.10;  $p < 0.0001$ ), particularly in relatively younger (age,  $<65$  years; adjusted HR: 2.10; 95% CI:  
5 1.85–2.38;  $p < 0.0001$ ) or male (adjusted HR: 2.19; 95% CI: 1.93–2.48;  $p < 0.0001$ ) patients  
6  
7 (Supplement Table 1). In addition, patients with VV showing cardiovascular risk factors,  
8  
9 including hypertension, diabetes, hyperlipidemia, and CAD, were at a higher risk of MACE than  
10  
11 were matched controls. In patients with VV, 3-, 6-, and 9-year MACE-free rates were 89.6%,  
12  
13 83.3%, and 78.2%, respectively (Figure 2A). These rates dramatically declined further with  
14  
15 disease severity (Figure 2B).  
16  
17

18  
19  
20 In terms of individual cardiovascular outcomes, patients with grade III VV were at a greater risk  
21  
22 of CHF (adjusted HR: 2.13; 95% CI: 1.80–2.53;  $p < 0.001$ ), ACS (adjusted HR: 2.03; 95% CI:  
23  
24 1.60–2.57;  $p < 0.001$ ), and ischemic stroke (adjusted HR: 1.53; 95% CI: 1.20–1.96;  $p < 0.001$ )  
25  
26 than were controls (Table 4). In particular, with higher VV severity there was an increasing trend  
27  
28 in terms of the risk of venous thrombotic events, including DVT and PE (Grade I: adjusted HR:  
29  
30 26.12; 95% CI, 14.64–46.62; Grade II: adjusted HR: 48.76; 95% CI 12.53–189.78; Grade III:  
31  
32 adjusted HR: 61.79; 95% CI, 29.13–131.06) (Table 4).  
33  
34  
35

### 36 *Validation of the Accuracy of VV Diagnosis and ICD-9-CM–Derived VV Grading*

37

38  
39 During 2010–2015 a total of 2202 outpatients and 347 inpatients were reported to have VV.  
40  
41 Among the outpatients, 1188 were coded as uncomplicated VV (ICD-9-CM code 454.9), 775  
42  
43 were coded as VV with inflammation (ICD-9-CM code 454.1), 152 were coded as VV with  
44  
45 ulcers (ICD-9-CM code 454.0), and 87 were coded as VV with ulcer and inflammation (ICD-9-  
46  
47 CM code 454.2) (Supplement Table 2). Notably, none were coded incorrectly. Compared with  
48  
49 CEAP stage, as determined based on chart reviews, only a few inpatients were incorrectly or  
50  
51 unclearly diagnosed using ICD-9-CM–derived VV codes (Supplement Table 3). For example,  
52  
53 among patients with higher VV grades (CEAP stage 5–6), the positive and negative predictive  
54  
55  
56

1  
2  
3  
4 values with ICD-9-CM–derived codes were 93% and 98.4%, respectively. Specifically, the  
5  
6 sensitivity and specificity of ICD-9-CM–derived grading were up to 95.2% and 97.6%,  
7  
8 respectively.  
9

## 10 11 12 13 **Discussion**

14  
15 The primary findings of this study were that (1) patients with VV were at a significantly  
16  
17 higher risk of mortality and MACE when compared with matched controls; (2) having VV had a  
18  
19 significant impact on the survival of patients <65 years of age and male patients; and (3)  
20  
21 compared with controls, patients with VV were at a higher risk of venous thrombotic events,  
22  
23 including DVT and PE. Moreover, the estimated risk increased with the severity of the VV. To  
24  
25 the best of our knowledge, this nationwide population-based study is the first to comprehensively  
26  
27 describe the association of VV with patients' cardiovascular outcomes.  
28  
29

30  
31 Although VV are common, their potential threat to health has not been well investigated  
32  
33 previously.<sup>1,2</sup> Valve dysfunction-mediated activation of leukocytes, release of enzymes, and  
34  
35 remodeling of the vascular wall lead to venous valve destruction and incompetence.<sup>11</sup> VV may  
36  
37 cause inflammation, edema, ulcers,<sup>11</sup> endothelial dysfunction,<sup>12</sup> and subsequent DVT.<sup>5</sup> In  
38  
39 addition, overexpression of inducible nitric oxide synthase and transforming growth  $\beta$   
40  
41 has been documented in patients with VV.<sup>13</sup> In this study, the risk of all-cause mortality and  
42  
43 MACE was higher in patients with VV than it was in matched controls, indicating that VV-  
44  
45 induced systemic inflammation may be associated with cardiovascular events regardless of the  
46  
47 development of venous thromboembolic events. However, only a few studies have compared  
48  
49 development of VV with arterial disease and reported inconsistent findings.<sup>2,14</sup> A previous study  
50  
51 in Finland has reported a two-fold higher incidence of new arterial disease in individuals with  
52  
53  
54  
55

1  
2  
3  
4 VV than in those without it, although the incidence of new hypertension was similar.<sup>14,15</sup> Thus,  
5  
6 VV and arterial disease may have a common etiology, but VV were not related to hypertension.  
7  
8 Furthermore, Chang et al. have reported the association of VV with the incidence of venous  
9  
10 thromboembolism and peripheral artery disease.<sup>16</sup> Reportedly, myocardial infarction and heart  
11  
12 failure increase the risk of thromboembolism.<sup>17</sup> In contrast, patients with thromboembolic events  
13  
14 were at a higher risk of subsequent myocardial infarction and stroke.<sup>18</sup> However, whether this  
15  
16 association is causal or represents common risk factors warrants further research. Notably,  
17  
18 compared with controls, patients with VV were at a higher risk of mortality independent of age  
19  
20 and sex. Specifically, the significant impact of VV was observed in relatively younger or male  
21  
22 patients. In previous research, older age and female sex were found to be the most relevant risk  
23  
24 factors for VV.<sup>1</sup> VV incidence increases with increasing age. However, Heit et al. have reported  
25  
26 that younger patients with VV were at a significantly increased risk of subsequent DVT, whereas  
27  
28 the risk was attenuated with increasing age.<sup>19</sup> Earlier onset of VV in the younger population  
29  
30 implies a higher risk of concomitant arterial diseases or systemic inflammations. As described  
31  
32 previously, female sex, pregnancy, and predominately being in the sitting posture are risk factors  
33  
34 for VV.<sup>20</sup> However, despite the valid correlation between use of estrogen supplements and DVT,  
35  
36 whether sex hormones contribute to the development of VV remains unclear.  
37  
38  
39  
40  
41  
42

43 There were several strengths of this study. First, we included an unselected, large,  
44  
45 nationwide cohort of patients with VV. By including the data of 4807 patients over a 12-year  
46  
47 period, this study provided adequate statistical power for the analysis of long-term outcomes for  
48  
49 VV. Second, we compared the VV cohort with a matched, VV-free cohort, which helped  
50  
51 distinguish the characteristics of the VV population in terms of survival and outcomes. In  
52  
53 addition, among patients with VV, the effects of sex and age on mortality and MACE were  
54  
55



1  
2  
3  
4 emphasized because VV may have been ignored in these specific populations. Finally, we  
5  
6 included patients presenting with VV of various severity grades, which allowed for a  
7  
8 comprehensive investigation of overall effects of severity.  
9

10  
11 However, this study had several limitations. According to previous meta-analysis and  
12  
13 research, smoking habits, lack of movement, age, sex, pregnancy history, overweight,  
14  
15 rheumatoid factor positivity, cholesterol levels, and glycated hemoglobin levels are considered  
16  
17 VV risk factors, with some of these being related to increased mortality risk. Although NHIRD  
18  
19 provides a complete clinical medical history over decades for 1 million people, currently the  
20  
21 NHIRD lacks information regarding people's lifestyle and clinical laboratory test results.  
22  
23 Therefore, the selected confounders in this study were limited to age, sex, and four chronic  
24  
25 cardiovascular risk factors. The small corresponding area under the receiver operating  
26  
27 characteristic curve indicated that the relevant confounders were not appropriately identified. To  
28  
29 explore the effects of VV on mortality and MACE with minimum confounding bias, a future  
30  
31 study including more comprehensive VV-related risk factors is imperative. Second, the  
32  
33 miscoding of VV severity may have led to the exclusion of uncomplicated cases. Nevertheless,  
34  
35 to overcome the inherent limitations, we verified the accuracy of VV diagnosis using chart  
36  
37 review by a specialist. Overall, both the validation methods indicated a satisfactory accuracy of  
38  
39 VV coding in the NHI database. Third, owing to difficulties in completing CEAP staging  
40  
41 according to ICD-9, we established our own grading system. However, even though this novel  
42  
43 ICD-9-CM-derived grading system clearly differentiated patients with various severities, it  
44  
45 remained different from the generally applied CEAP staging system and disease progression  
46  
47 could hardly be represented. Similarly, to validate the reliability of the ICD-9-CM-derived  
48  
49 grading system, we reviewed medical records of inpatients with VV and observed satisfactory  
50  
51  
52  
53  
54  
55  
56  
57  
58  
59  
60

1  
2  
3  
4 sensitivity and specificity. Finally, increased mortality with higher ICD-9-CM–derived grades  
5  
6 indicated that our grading system specifically reflected the severity of VV.  
7

8  
9 Collectively, VV are a common condition typically believed to be benign; however, our  
10  
11 results suggest that they warrant close attention. Compared with matched controls, patients with  
12  
13 VV were at a higher risk of mortality and cardiovascular events. Therefore, these findings should  
14  
15 alert clinicians regarding the importance of detecting VV at an early stage.  
16  
17

18  
19  
20 **Author Contributions:** All authors contributed to the revision of the manuscript and approved  
21  
22 the final version. All agreed to be accountable. NC Wu contributed to concept and design,  
23  
24 critical revision. ZC Chen contributed to data collection and critical revision. IJ Feng contributed  
25  
26 to critical revision, data collection, statistical analysis and interpretation. CH Ho contributed to  
27  
28 critical revision, data collection, statistical analysis and interpretation. CY Chiang contributed to  
29  
30 data collection and critical revision. JJ Wang contributed to data collection and critical revision.  
31  
32 WT Chang contributed to concept and design, data collection, interpretation, manuscript writing  
33  
34 and critical revision.  
35  
36  
37

38  
39 **Disclosure:** None  
40  
41

42  
43 **Funding:** We received the research grant supported by Chi-Mei Medical Center  
44  
45

46  
47 **Disclaimer:** The funders had no role in study design, data collection and analysis, decision to  
48  
49 publish, or preparation of the manuscript.  
50

51  
52 **Competing interests:** None declared.  
53

54  
55 **Patient consent:** Detail has been removed from this case description/these case descriptions to  
56

1  
2  
3  
4 ensure anonymity. The editors and reviewers have seen the detailed information available and  
5  
6 are satisfied that the information backs up the case the authors are making.  
7  
8

9  
10 **Patient and public involvement:** This study is based on database while no patient is actually  
11  
12 involved.  
13

14  
15 **Ethics approval:** The present study was ethically approved by the Institutional Review Board of  
16  
17 Chi-Mei Hospital (CV code: 10406-E01).  
18  
19  
20  
21  
22

## 23 **References**

- 24  
25  
26  
27 1. Beebe-Dimmer JL, Pfeifer JR, Engle JS, Schottenfeld D. The epidemiology of chronic  
28  
29 venous insufficiency and varicose veins. *Annals of epidemiology* 2005;15:175-84.  
30  
31
- 32 2. Cesarone MR, Belcaro G, Nicolaides AN, Geroulakos G, Griffin M, Incandela L, et al.  
33  
34 'Real' epidemiology of varicose veins and chronic venous diseases: the San Valentino  
35  
36 Vascular Screening Project. *Angiology* 2002;53:119-30.  
37  
38
- 39 3. Eberhardt RT, Raffetto JD. Chronic venous insufficiency. *Circulation*.2014;130:333-46.  
40  
41  
42
- 43 4. Nicolaides AN. Investigation of chronic venous insufficiency: A consensus statement  
44  
45 (France, March 5-9, 1997). *Circulation* 2000;102:E126-63.  
46  
47
- 48 5. Muller-Buhl U, Leutgeb R, Engeser P, Achankeng EN, Szecsenyi J, Laux G. Varicose  
49  
50 veins are a risk factor for deep venous thrombosis in general practice patients. *VASA*  
51  
52 2012;41:360-5.  
53  
54  
55

- 1  
2  
3  
4 6. Sogaard KK, Schmidt M, Pedersen L, Horvath-Puho E, Sorensen HT. 30-year mortality  
5  
6 after venous thromboembolism: a population-based cohort study. *Circulation*  
7  
8 2014;130:829-36.  
9  
10
- 11  
12 7. Heit JA, Silverstein MD, Mohr DN, Petterson TM, O'Fallon WM, Melton LJ, 3rd. Risk  
13  
14 factors for deep vein thrombosis and pulmonary embolism: a population-based case-  
15  
16 control study. *Arch Intern Med* 2000;160:809-15.  
17  
18
- 19  
20 8. Chang CH, Lin CH, Caffrey JL, Lee YC, Liu YC, Lin JW, et al. Risk of Intracranial  
21  
22 Hemorrhage From Statin Use in Asians: A Nationwide Cohort Study. *Circulation*  
23  
24 2015;131:2070-8.  
25  
26
- 27  
28 9. Cheng CL, Kao YH, Lin SJ, Lee CH, Lai ML. Validation of the National Health  
29  
30 Insurance Research Database with ischemic stroke cases in Taiwan.  
31  
32 *Pharmacoepidemiology and drug safety* 2011;20:236-42.  
33  
34
- 35  
36 10. Peter C. Austin, "An introduction to propensity score methods for reducing the effects of  
37  
38 confounding in observational studies", *Multivariate Behav Res.* 2011 May; 46(3): 399–  
39  
40 424  
41  
42
- 43  
44 11. Markovic JN, Shortell CK. Genomics of varicose veins and chronic venous insufficiency.  
45  
46 *Semin Vasc Surg* 2013;26:2-13.11.  
47
- 48  
49 12. Komarów W, Hawro P, Lekston A, Urbanek T, Zagrodzki P. Endothelial dysfunction in  
50  
51 patients with chronic venous disease: an evaluation based on the flow-mediated dilatation  
52  
53 test. *Int Angiol.* 2015;34:36-42.  
54  
55

- 1  
2  
3  
4 13. Jacob T, Hingorani A, Ascher E. Overexpression of transforming growth factor-beta 1  
5 correlates with increased synthesis of nitric oxide synthase in varicose veins. *J Vasc Surg*  
6 2005;41:523-30.  
7  
8  
9  
10  
11  
12 14. Makivaara LA, Ahti TM, Luukkaala T, Hakama M, Laurikka JO. Persons with varicose  
13 veins have a high subsequent incidence of arterial disease: a population-based study in  
14 Tampere, Finland. *Angiology* 2007;58:704-9.  
15  
16  
17  
18  
19  
20 15. Piazza G, Goldhaber SZ. Venous thromboembolism and atherothrombosis: an integrated  
21 approach. *Circulation* 2010;121:2146-50.  
22  
23  
24  
25 16. Chang SL, Huang YL, Lee MC, Hu S, Hsiao YC, Chang SW, et al.  
26  
27 Association of Varicose Veins With Incident Venous Thromboembolism and Peripheral  
28 Artery Disease. *JAMA*. 2018 Feb 27;319(8):807-817.  
29  
30  
31  
32  
33 17. Sørensen HT, Horvath-Puho E, Lash TL, Christiansen CF, Pesavento R, Pedersen L, et  
34 al. Heart disease may be a risk factor for pulmonary embolism without peripheral deep  
35 venous thrombosis. *Circulation* 2011;124:1435-41.  
36  
37  
38  
39  
40  
41 18. Sorensen HT, Horvath-Puho E, Pedersen L, Baron JA, Prandoni P. Venous  
42 thromboembolism and subsequent hospitalisation due to acute arterial cardiovascular  
43 events: a 20-year cohort study. *Lancet* 2007;370:1773-9.  
44  
45  
46  
47  
48  
49 19. Heit JA, Silverstein MD, Mohr DN, Petterson TM, O'Fallon WM, Melton LJ 3rd. Risk  
50 factors for deep vein thrombosis and pulmonary embolism: a population-based case-  
51 control study. *Arch Intern Med*. 2000;160:809-15  
52  
53  
54  
55

- 1  
2  
3  
4 20. Fowkes FG, Lee AJ, Evans CJ, Allan PL, Bradbury AW, Ruckley CV. Lifestyle risk  
5 factors for lower limb venous reflux in the general population: Edinburgh Vein Study. *Int*  
6  
7  
8  
9 *J Epidemiol* 2001;30:846-52.  
10  
11  
12  
13  
14  
15  
16  
17  
18  
19  
20  
21  
22  
23  
24  
25  
26  
27  
28  
29  
30  
31  
32  
33  
34  
35  
36  
37  
38  
39  
40  
41  
42  
43  
44  
45  
46  
47  
48  
49  
50  
51  
52  
53  
54  
55  
56  
57  
58  
59  
60

For peer review only

**Table 1.** Baseline characteristics and comorbid medical disorders for the control cohort and patients with varicose vein (VV).

| <b>Characteristic</b>          | <b>Varicose vein</b> | <b>Controls</b>  |                            |
|--------------------------------|----------------------|------------------|----------------------------|
| <b>n (%)</b>                   | <b>n = 4807</b>      | <b>n = 38456</b> | <b>P-value<sup>b</sup></b> |
| <b>Age (years)</b>             |                      |                  | 0.9608                     |
| < 65                           | 3255 (67.71)         | 26058 (67.76)    |                            |
| ≥ 65                           | 1552 (32.29)         | 12398 (32.24)    |                            |
| <b>Age(mean±SD)</b>            | 56.27 ± 16.13        | 56.32 ± 15.60    | 0.8392                     |
| <b>Gender</b>                  |                      |                  | 0.3920                     |
| <b>Male</b>                    | 1897 (39.46)         | 14926 (38.81)    |                            |
| <b>Female</b>                  | 2910 (60.54)         | 23530 (61.19)    |                            |
| <b>Hypertension</b>            |                      |                  | 0.4642                     |
| <b>No</b>                      | 3837 (79.82)         | 30872 (80.28)    |                            |
| <b>Yes</b>                     | 970 (20.18)          | 7584 (19.72)     |                            |
| <b>Diabetes</b>                |                      |                  | 0.7580                     |
| <b>No</b>                      | 4337 (90.22)         | 34754 (90.37)    |                            |
| <b>Yes</b>                     | 470 (9.78)           | 3702 (9.63)      |                            |
| <b>Hyperlipidemia</b>          |                      |                  | 0.8111                     |
| <b>No</b>                      | 4502 (93.66)         | 35977 (93.55)    |                            |
| <b>Yes</b>                     | 305 (6.34)           | 2479 (6.45)      |                            |
| <b>Coronary artery disease</b> |                      |                  | 0.6037                     |
| <b>No</b>                      | 4589 (95.46)         | 36779 (95.64)    |                            |
| <b>Yes</b>                     | 218 (4.54)           | 1677 (4.36)      |                            |

1  
2  
3  
4 P-value was calculated based on the two sample t test and Pearson's chi-square test.  
5  
6  
7  
8  
9  
10  
11  
12  
13  
14  
15  
16  
17  
18  
19  
20  
21  
22  
23  
24  
25  
26  
27  
28  
29  
30  
31  
32  
33  
34  
35  
36  
37  
38  
39  
40  
41  
42  
43  
44  
45  
46  
47  
48  
49  
50  
51  
52  
53  
54  
55  
56  
57  
58  
59  
60

For peer review only



**Table 2.** Baseline characteristics and comorbid medical disorders for patients with VV categorized by the disease severity.

| Characteristic                 | Grade I              | Grade II            | Grade III            |                |
|--------------------------------|----------------------|---------------------|----------------------|----------------|
| <b>n (%)</b>                   | <b>2525 (52.53%)</b> | <b>704 (14.65%)</b> | <b>1578 (32.83%)</b> | <b>P-value</b> |
| <b>Age (years)</b>             |                      |                     |                      | <0.0001        |
| < 65                           | 1789 (70.85)         | 444 (63.07)         | 1022 (64.77)         |                |
| ≥ 65                           | 736 (29.15)          | 260 (36.93)         | 556 (35.23)          |                |
| <b>Age (mean±SD)</b>           | 55.69 ± 14.83        | 57.68 ± 17.52       | 56.57 ± 17.39        | 0.0540         |
| <b>Gender</b>                  |                      |                     |                      | 0.0271         |
| <b>Male</b>                    | 811 (32.12)          | 297 (42.19)         | 789 (50.00)          |                |
| <b>Female</b>                  | 1714 (67.88)         | 407 (57.81)         | 789 (50.00)          |                |
| <b>Hypertension</b>            |                      |                     |                      | 0.0235         |
| <b>No</b>                      | 2056 (81.43)         | 553 (78.55)         | 1228 (77.82)         |                |
| <b>Yes</b>                     | 469 (18.57)          | 151 (21.45)         | 350 (22.18)          |                |
| <b>Diabetes</b>                |                      |                     |                      | <0.0001        |
| <b>No</b>                      | 2331 (92.32)         | 634 (90.06)         | 1372 (86.95)         |                |
| <b>Yes</b>                     | 194 (7.68)           | 70 (9.94)           | 206 (13.05)          |                |
| <b>Hyperlipidemia</b>          |                      |                     |                      | 0.3894         |
| <b>No</b>                      | 2376 (94.10)         | 650 (92.33)         | 1476 (93.54)         |                |
| <b>Yes</b>                     | 149 (5.90)           | 54 (7.67)           | 102 (6.46)           |                |
| <b>Coronary artery disease</b> |                      |                     |                      | 0.4968         |
| <b>No</b>                      | 2409 (95.41)         | 668 (94.89)         | 1512 (95.82)         |                |
| <b>Yes</b>                     | 116 (4.59)           | 36 (5.11)           | 66 (4.18)            |                |

P-value was calculated based on the one way ANOVA and Pearson's chi-square test.

**Table 3.** Crude and adjusted hazard ratios of all-cause mortality in patients with VV compared with the matched control cohort during the follow-up period.

| <b>Cohort</b>              | <b>Crude HR (95% CI)</b> | <b>p-value</b> | <b>Adjusted HR (95% CI)*</b> | <b>p-value</b> |
|----------------------------|--------------------------|----------------|------------------------------|----------------|
| <b>All (n =)</b>           |                          |                |                              |                |
| <b>Overall analysis</b>    |                          |                |                              |                |
| VV                         | 1.26 (1.11, 1.44)        | 0.0005         | 1.26 (1.10, 1.46)            | 0.0012         |
| Controls                   | 1[reference]             |                | 1[reference]                 |                |
| <b>Stratified analysis</b> |                          |                |                              |                |
| <b>Age (years)</b>         |                          |                |                              |                |
| <b>&lt; 65 (years)</b>     |                          |                |                              |                |
| VV                         | 1.67 (1.27, 2.18)        | 0.0002         | 1.65 (1.25, 2.17)            | 0.0004         |
| Controls                   | 1[reference]             |                | 1[reference]                 |                |
| <b>≥ 65 (years)</b>        |                          |                |                              |                |
| VV                         | 1.15 (0.96, 1.37)        | 0.1347         | 1.12 (0.94, 1.34)            | 0.2148         |
| Controls                   | 1[reference]             |                | 1[reference]                 |                |
| <b>Gender</b>              |                          |                |                              |                |
| <b>Male</b>                |                          |                |                              |                |
| VV                         | 1.36 (1.14, 1.64)        | 0.0008         | 1.42 (1.17, 1.72)            | 0.0004         |
| Controls                   | 1[reference]             |                | 1[reference]                 |                |
| <b>Female</b>              |                          |                |                              |                |
| VV                         | 1.24 (0.98, 1.55)        | 0.0682         | 1.16 (0.91, 1.47)            | 0.2399         |
| Controls                   | 1[reference]             |                | 1[reference]                 |                |

|                                |                   |        |                   |        |
|--------------------------------|-------------------|--------|-------------------|--------|
| <b>Hypertension</b>            |                   |        |                   |        |
| VV                             | 1.01 (0.75, 1.35) | 0.9643 | 1.03 (0.76, 1.41) | 0.8506 |
| Controls                       | 1[reference]      |        | 1[reference]      |        |
| <b>Diabetes</b>                |                   |        |                   |        |
| VV                             | 0.87 (0.53, 1.43) | 0.5868 | 0.87 (0.53, 1.43) | 0.5785 |
| Controls                       | 1[reference]      |        | 1[reference]      |        |
| <b>Hyperlipidemia</b>          |                   |        |                   |        |
| VV                             | 0.69 (0.21, 2.27) | 0.5461 | 0.65 (0.16, 2.68) | 0.5509 |
| Controls                       | 1[reference]      |        | 1[reference]      |        |
| <b>Coronary artery disease</b> |                   |        |                   |        |
| VV                             | 1.31 (0.72, 2.37) | 0.3823 | 1.32 (0.72, 2.43) | 0.3677 |
| Controls                       | 1[reference]      |        | 1[reference]      |        |

HR = Hazard Ratio; CI = Confidence Interval

\* Adjusted age, gender, hypertension, diabetes, hyperlipidemia, coronary artery disease

**Table 4.** The adjusted hazard ratios of major cardiovascular adverse events (MACE) in patients with VV compared with the matched control cohort during the follow-up period.

|                                           | <b>Controls</b> | <b>Grade 1</b>         | <b>Grade 2</b>          | <b>Grade 3</b>          |
|-------------------------------------------|-----------------|------------------------|-------------------------|-------------------------|
| No. of CHF, N (%)                         | 2553 (6.64)     | 249 (9.86)             | 87 (12.36)              | 204 (12.93)             |
| Adjusted HR for CHF (95% CI)*             | Referent        | 1.80 (1.55, 2.10) †    | 1.66 (1.28, 2.14) †     | 2.13 (1.80, 2.53) †     |
| No. of ACS, N (%)                         | 1276 (3.32)     | 132 (5.23)             | 29 (4.12)               | 104 (6.59)              |
| Adjusted HR for ACS (95% CI)*             | Referent        | 1.72 (1.40, 2.11) †    | 1.14 (0.75, 1.74)       | 2.03 (1.60, 2.57) †     |
| No. of ischemic stroke, N (%)             | 1385 (3.60)     | 106 (4.20)             | 33 (4.69)               | 94 (5.96)               |
| Adjusted HR for ischemic stroke (95% CI)* | Referent        | 1.32 (1.05, 1.64) †    | 1.28 (0.85, 1.92)       | 1.53 (1.20, 1.96) †     |
| No. of DVT +PE, N (%)                     | 46 (0.12)       | 58 (2.30)              | 14 (1.99)               | 64 (4.06)               |
| Adjusted HR for DVT +PE (95% CI)*         | Referent        | 26.12 (14.64, 46.62) † | 48.76 (12.53, 189.78) † | 61.79 (29.13, 131.06) † |

†p<0.05 \* Adjusted age, gender, hypertension, diabetes, hyperlipidemia, coronary artery disease

HR = Hazard Ratio; CI = Confidence Interval; CHF=congestive heart failure; ACS= acute coronary syndrome; DVT = deep vein thrombosis; PE= pulmonary embolism

1  
2  
3  
4  
5  
6  
7  
8  
9  
10  
11  
12  
13  
14  
15  
16  
17  
18  
19  
20  
21  
22  
23  
24  
25  
26  
27  
28  
29  
30  
31  
32  
33  
34  
35  
36  
37  
38  
39  
40  
41  
42  
43  
44  
45  
46  
47

1 **Figure Legends**

2 **Figure 1.** (A) Kaplan-Meier estimates of 12-year survival between patients with varicose veins (VV) and the matched control cohort.

3 (B) Kaplan-Meier estimates of 12-year survival between patients with VV categorized by the disease severities and the matched  
4 control cohort.

5 **Figure 2.** (A) Kaplan-Meier estimates of 12-year free from MACE between patients with varicose veins (VV) and the matched control  
6 cohort. (B) Kaplan-Meier estimates of 12-year free from MACE between patients with VV categorized by the disease severities and  
7 the matched control cohort.

8  
9

10

For peer review only

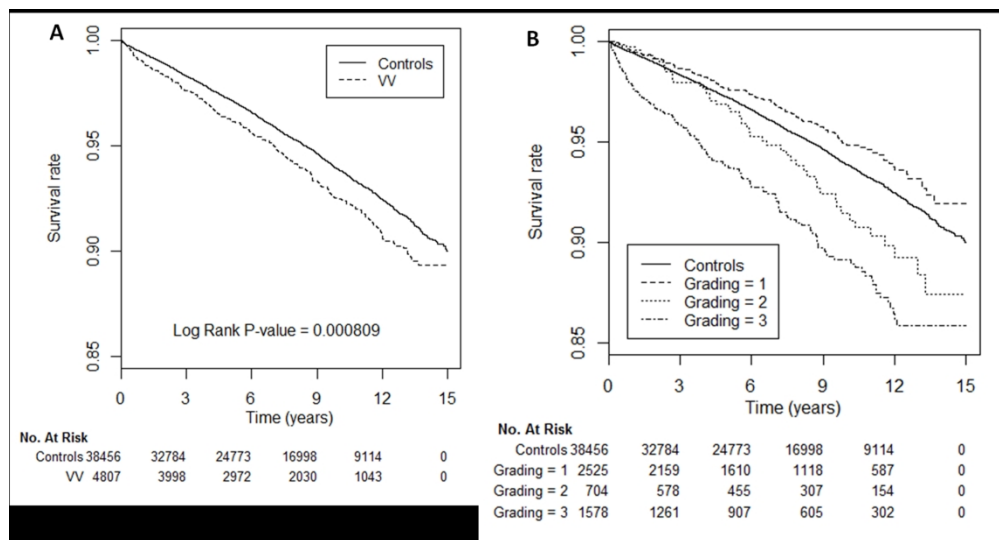

Figure 1. (A) Kaplan-Meier estimates of 12-year survival between patients with varicose veins (VV) and the matched control cohort. (B) Kaplan-Meier estimates of 12-year survival between patients with VV categorized by the disease severities and the matched control cohort.

264x141mm (300 x 300 DPI)

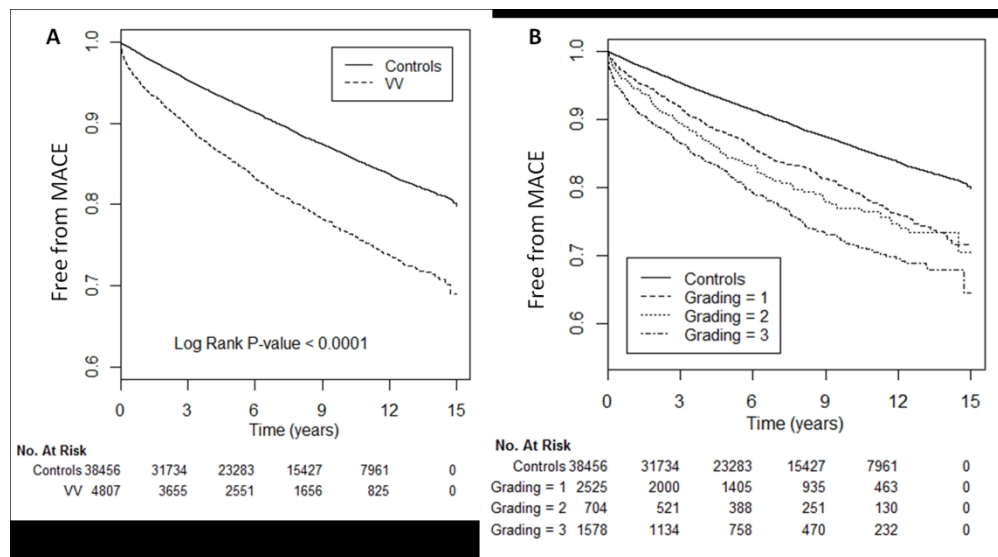

Figure 2. (A) Kaplan-Meier estimates of 12-year free from MACE between patients with varicose veins (VV) and the matched control cohort. (B) Kaplan-Meier estimates of 12-year free from MACE between patients with VV categorized by the disease severities and the matched control cohort.

264x146mm (300 x 300 DPI)

**Supplement Table 1.** Crude and adjusted hazard ratios of major cardiovascular events in patients with VV compared with the matched control cohort during the follow-up period

| <b>Cohort</b><br><b>All (n =)</b> | <b>Crude HR (95%<br/>CI)</b> | <b>p-<br/>value</b> | <b>Adjusted HR (95%<br/>CI)*</b> | <b>p-<br/>value</b> |
|-----------------------------------|------------------------------|---------------------|----------------------------------|---------------------|
| <b>Overall analysis</b>           |                              |                     |                                  |                     |
| VV                                | 1.91 (1.77, 2.06)            | <.0001              | 1.94 (1.79, 2.10)                | <.0001              |
| Controls                          | 1[reference]                 |                     | 1[reference]                     |                     |
| <b>Stratified analysis</b>        |                              |                     |                                  |                     |
| <b>Age (years)</b>                |                              |                     |                                  |                     |
| <b>&lt; 65 (years)</b>            |                              |                     |                                  |                     |
| VV                                | 2.02 (1.78, 2.28)            | <.0001              | 2.10 (1.85, 2.38)                | <.0001              |
| Controls                          | 1[reference]                 |                     | 1[reference]                     |                     |
| <b>≥ 65 (years)</b>               |                              |                     |                                  |                     |
| VV                                | 1.94 (1.73, 2.18)            | <.0001              | 1.93 (1.72, 2.16)                | <.0001              |
| Controls                          | 1[reference]                 |                     | 1[reference]                     |                     |
| <b>Gender</b>                     |                              |                     |                                  |                     |
| <b>Male</b>                       |                              |                     |                                  |                     |
| VV                                | 2.09 (1.85, 2.35)            | <.0001              | 2.19 (1.93, 2.48)                | <.0001              |
| Controls                          | 1[reference]                 |                     | 1[reference]                     |                     |
| <b>Female</b>                     |                              |                     |                                  |                     |
| VV                                | 1.76 (1.57, 1.97)            | <.0001              | 1.75 (1.56, 1.97)                | <.0001              |
| Controls                          | 1[reference]                 |                     | 1[reference]                     |                     |
| <b>Hypertension</b>               |                              |                     |                                  |                     |
| VV                                | 1.85 (1.57, 2.18)            | <.0001              | 1.87 (1.58, 2.21)                | <.0001              |
| Controls                          | 1[reference]                 |                     | 1[reference]                     |                     |
| <b>Diabetes</b>                   |                              |                     |                                  |                     |
| VV                                | 1.46 (1.09, 1.96)            | 0.0104              | 1.52 (1.13, 2.04)                | 0.0057              |
| Controls                          | 1[reference]                 |                     | 1[reference]                     |                     |
| <b>Hyperlipidemia</b>             |                              |                     |                                  |                     |
| VV                                | 2.42 (1.48, 3.94)            | 0.0004              | 2.34 (1.39, 3.94)                | 0.0015              |
| Controls                          | 1[reference]                 |                     | 1[reference]                     |                     |
| <b>Coronary artery disease</b>    |                              |                     |                                  |                     |
| VV                                | 2.44 (1.72, 3.46)            | <.0001              | 2.44 (1.72, 3.48)                | <.0001              |
| Controls                          | 1[reference]                 |                     | 1[reference]                     |                     |

HR = Hazard Ratio; CI = Confidence Interval

\* Adjusted Grade, age, gender, hypertension, diabetes, hyperlipidemia, coronary artery disease



**Supplement Table 2. ICD-9 codes versus chart review diagnosis among outpatients with VV**

| Code                                                        | No.  | Clinical diagnosis | No.  |
|-------------------------------------------------------------|------|--------------------|------|
| <b>454.9 Asymptomatic varicose veins</b>                    | 1188 | VV                 | 1188 |
|                                                             |      | Others             | 0    |
| <b>454.1 With inflammation</b>                              | 775  | VV                 | 775  |
|                                                             |      | Others             | 0    |
| <b>454.0 Varicose veins of lower extremities With ulcer</b> | 152  | VV                 | 152  |
|                                                             |      | Others             | 0    |
| <b>454.2 With ulcer and inflammation</b>                    | 87   | VV                 | 87   |
|                                                             |      | Others             | 0    |

**Supplement Table 3. ICD-9 codes-derived severity grading versus Clinical–  
Etiological–Anatomical–Pathophysiological (CEAP) stages of inpatients with VV**

| Code                                                                | No. | CEAP stage | No. |
|---------------------------------------------------------------------|-----|------------|-----|
| <b>454.9 Asymptomatic<br/>varicose veins</b>                        | 193 | C0-2       | 183 |
|                                                                     |     | C3-4       | 6   |
|                                                                     |     | C5-6       | 4   |
| <b>454.1 With<br/>inflammation</b>                                  | 56  | C0-2       | 0   |
|                                                                     |     | C3-4       | 56  |
|                                                                     |     | C5-6       | 0   |
| <b>454.0 Varicose veins of<br/>lower extremities With<br/>ulcer</b> | 86  | C0-2       | 6   |
|                                                                     |     | C3-4       | 0   |
|                                                                     |     | C5-6       | 80  |
| <b>454.2 With ulcer and<br/>inflammation</b>                        | 12  |            |     |

|        | CEAP 0-2       | Not CEAP       |                |
|--------|----------------|----------------|----------------|
| Test + | 183            | 10             | 183/193 (94.8) |
| Test - | 6              | 136            | 136/142 (95.7) |
|        | 183/189 (96.8) | 136/146 (93.1) |                |

| <b>Statistic</b>                 | <b>Estimate</b> | <b>95% CI</b>    |
|----------------------------------|-----------------|------------------|
| <b>Sensitivity</b>               | 96.83%          | 93.22% to 98.83% |
| <b>Specificity</b>               | 93.15 %         | 87.76% to 96.67% |
| <b>Positive Predictive Value</b> | 94.82%          | 90.95% to 97.08% |
| <b>Negative Predictive Value</b> | 95.77 %         | 91.15% to 98.03% |

|        | CEAP 3-4     | Not CEAP      |                |
|--------|--------------|---------------|----------------|
| Test + | 56           | 0             | 56/56 (100)    |
| Test - | 6            | 273           | 273/279 (97.8) |
|        | 56/62 (90.3) | 273/273 (100) |                |

| <b>Statistic</b>                 | <b>Estimate</b> | <b>95% CI</b>     |
|----------------------------------|-----------------|-------------------|
| <b>Sensitivity</b>               | 90.32%          | 80.12% to 96.37%  |
| <b>Specificity</b>               | 100.00 %        | 98.66% to 100.00% |
| <b>Positive Predictive Value</b> | 100.00%         |                   |
| <b>Negative Predictive Value</b> | 97.85 %         | 95.51% to 98.98%  |

|        |              |                |                |
|--------|--------------|----------------|----------------|
|        | CEAP 5-6     | Not CEAP       |                |
| Test + | 80           | 6              | 80/86 (93)     |
| Test - | 4            | 245            | 245/249 (98.4) |
|        | 80/84 (95.2) | 245/251 (97.6) |                |

| <b>Statistic</b>                 | <b>Estimate</b> | <b>95% CI</b>    |
|----------------------------------|-----------------|------------------|
| <b>Sensitivity</b>               | 95.24%          | 88.25% to 98.69% |
| <b>Specificity</b>               | 97.61 %         | 94.87% to 99.12% |
| <b>Positive Predictive Value</b> | 93.02%          | 85.79% to 96.71% |
| <b>Negative Predictive Value</b> | 98.39 %         | 95.92% to 99.38% |

STROBE Statement—Checklist of items that should be included in reports of *cohort studies*

|                              | Item No | Recommendation                                                                                                                                                                                    | Page No |
|------------------------------|---------|---------------------------------------------------------------------------------------------------------------------------------------------------------------------------------------------------|---------|
| <b>Title and abstract</b>    | 1       | (a) Indicate the study's design with a commonly used term in the title or the abstract                                                                                                            | 1       |
|                              |         | (b) Provide in the abstract an informative and balanced summary of what was done and what was found                                                                                               | 3       |
| <b>Introduction</b>          |         |                                                                                                                                                                                                   |         |
| Background/rationale         | 2       | Explain the scientific background and rationale for the investigation being reported                                                                                                              | 5       |
| Objectives                   | 3       | State specific objectives, including any prespecified hypotheses                                                                                                                                  | 5       |
| <b>Methods</b>               |         |                                                                                                                                                                                                   |         |
| Study design                 | 4       | Present key elements of study design early in the paper                                                                                                                                           | 6       |
| Setting                      | 5       | Describe the setting, locations, and relevant dates, including periods of recruitment, exposure, follow-up, and data collection                                                                   | 6       |
| Participants                 | 6       | (a) Give the eligibility criteria, and the sources and methods of selection of participants. Describe methods of follow-up                                                                        | 6       |
|                              |         | (b) For matched studies, give matching criteria and number of exposed and unexposed                                                                                                               | 6       |
| Variables                    | 7       | Clearly define all outcomes, exposures, predictors, potential confounders, and effect modifiers. Give diagnostic criteria, if applicable                                                          | 6       |
| Data sources/<br>measurement | 8*      | For each variable of interest, give sources of data and details of methods of assessment (measurement). Describe comparability of assessment methods if there is more than one group              | 6       |
| Bias                         | 9       | Describe any efforts to address potential sources of bias                                                                                                                                         | 6       |
| Study size                   | 10      | Explain how the study size was arrived at                                                                                                                                                         | 7       |
| Quantitative variables       | 11      | Explain how quantitative variables were handled in the analyses. If applicable, describe which groupings were chosen and why                                                                      | 7       |
| Statistical methods          | 12      | (a) Describe all statistical methods, including those used to control for confounding                                                                                                             | 8       |
|                              |         | (b) Describe any methods used to examine subgroups and interactions                                                                                                                               | 9       |
|                              |         | (c) Explain how missing data were addressed                                                                                                                                                       | 9       |
|                              |         | (d) If applicable, explain how loss to follow-up was addressed                                                                                                                                    | 9       |
|                              |         | (e) Describe any sensitivity analyses                                                                                                                                                             | 9       |
| <b>Results</b>               |         |                                                                                                                                                                                                   |         |
| Participants                 | 13*     | (a) Report numbers of individuals at each stage of study—eg numbers potentially eligible, examined for eligibility, confirmed eligible, included in the study, completing follow-up, and analysed | 10      |
|                              |         | (b) Give reasons for non-participation at each stage                                                                                                                                              | 10      |
|                              |         | (c) Consider use of a flow diagram                                                                                                                                                                | 10      |
| Descriptive data             | 14*     | (a) Give characteristics of study participants (eg demographic, clinical, social) and information on exposures and potential confounders                                                          | 10      |
|                              |         | (b) Indicate number of participants with missing data for each variable of interest                                                                                                               | 10      |
|                              |         | (c) Summarise follow-up time (eg, average and total amount)                                                                                                                                       | 10      |
| Outcome data                 | 15*     | Report numbers of outcome events or summary measures over time                                                                                                                                    | 10      |

|    |                          |    |                                                                                                                                                                                                              |    |
|----|--------------------------|----|--------------------------------------------------------------------------------------------------------------------------------------------------------------------------------------------------------------|----|
| 1  | Main results             | 16 | (a) Give unadjusted estimates and, if applicable, confounder-adjusted estimates and their precision (eg, 95% confidence interval). Make clear which confounders were adjusted for and why they were included | 11 |
| 2  |                          |    | (b) Report category boundaries when continuous variables were categorized                                                                                                                                    | 11 |
| 3  |                          |    | (c) If relevant, consider translating estimates of relative risk into absolute risk for a meaningful time period                                                                                             | 11 |
| 4  |                          |    |                                                                                                                                                                                                              |    |
| 5  | Other analyses           | 17 | Report other analyses done—eg analyses of subgroups and interactions, and sensitivity analyses                                                                                                               | 11 |
| 6  |                          |    |                                                                                                                                                                                                              |    |
| 7  |                          |    |                                                                                                                                                                                                              |    |
| 8  |                          |    |                                                                                                                                                                                                              |    |
| 9  |                          |    |                                                                                                                                                                                                              |    |
| 10 |                          |    |                                                                                                                                                                                                              |    |
| 11 | <b>Discussion</b>        |    |                                                                                                                                                                                                              |    |
| 12 | Key results              | 18 | Summarise key results with reference to study objectives                                                                                                                                                     | 12 |
| 13 | Limitations              | 19 | Discuss limitations of the study, taking into account sources of potential bias or imprecision. Discuss both direction and magnitude of any potential bias                                                   | 12 |
| 14 |                          |    |                                                                                                                                                                                                              |    |
| 15 | Interpretation           | 20 | Give a cautious overall interpretation of results considering objectives, limitations, multiplicity of analyses, results from similar studies, and other relevant evidence                                   | 13 |
| 16 |                          |    |                                                                                                                                                                                                              |    |
| 17 | Generalisability         | 21 | Discuss the generalisability (external validity) of the study results                                                                                                                                        | 14 |
| 18 |                          |    |                                                                                                                                                                                                              |    |
| 19 |                          |    |                                                                                                                                                                                                              |    |
| 20 |                          |    |                                                                                                                                                                                                              |    |
| 21 | <b>Other information</b> |    |                                                                                                                                                                                                              |    |
| 22 | Funding                  | 22 | Give the source of funding and the role of the funders for the present study and, if applicable, for the original study on which the present article is based                                                | 15 |
| 23 |                          |    |                                                                                                                                                                                                              |    |
| 24 |                          |    |                                                                                                                                                                                                              |    |

\*Give information separately for exposed and unexposed groups.

**Note:** An Explanation and Elaboration article discusses each checklist item and gives methodological background and published examples of transparent reporting. The STROBE checklist is best used in conjunction with this article (freely available on the Web sites of PLoS Medicine at <http://www.plosmedicine.org/>, Annals of Internal Medicine at <http://www.annals.org/>, and Epidemiology at <http://www.epidem.com/>). Information on the STROBE Initiative is available at <http://www.strobe-statement.org>.

# BMJ Open

## The severe varicose veins and the risk of mortality: A nationwide population-based cohort study

|                                 |                                                                                                                                                                                                                                                                                                                                                                                                                                                                                                                                                                                                                                                                                                                                                                                                                                                                   |
|---------------------------------|-------------------------------------------------------------------------------------------------------------------------------------------------------------------------------------------------------------------------------------------------------------------------------------------------------------------------------------------------------------------------------------------------------------------------------------------------------------------------------------------------------------------------------------------------------------------------------------------------------------------------------------------------------------------------------------------------------------------------------------------------------------------------------------------------------------------------------------------------------------------|
| Journal:                        | <i>BMJ Open</i>                                                                                                                                                                                                                                                                                                                                                                                                                                                                                                                                                                                                                                                                                                                                                                                                                                                   |
| Manuscript ID                   | bmjopen-2019-034245.R1                                                                                                                                                                                                                                                                                                                                                                                                                                                                                                                                                                                                                                                                                                                                                                                                                                            |
| Article Type:                   | Original research                                                                                                                                                                                                                                                                                                                                                                                                                                                                                                                                                                                                                                                                                                                                                                                                                                                 |
| Date Submitted by the Author:   | 12-Dec-2019                                                                                                                                                                                                                                                                                                                                                                                                                                                                                                                                                                                                                                                                                                                                                                                                                                                       |
| Complete List of Authors:       | Wu, Nan-Chun ; Chi Mei Medical Center, Department of Cardiovascular Surgery; Chia Nan University of Pharmacy and Science, Department of Hospital and Health Care Administration, Biotechnology<br>Chen, Zhih-Cherng ; Chi Mei Medical Center, Department of Cardiology; Chia Nan University of Pharmacy and Science, Department of Pharmacy<br>Feng, I-Jung ; Chi Mei Medical Center, Department of Healthcare Administration and Medical Informatics<br>Ho, Chung-Han; Chi Mei Medical Center, Medical Research<br>Chiang, Chun-Yen ; Chi Mei Medical Center, Division of Cardiology, Department of Internal Medicine; Chia Nan University of Pharmacy and Science, Department of Pharmacology<br>Wang, Jhi-Joung ; Chi Mei Medical Center, Medical Research<br>Chang, Wei-Ting; Chi Mei Medical Center, Division of Cardiology, Department of Internal Medicine |
| <b>Primary Subject Heading</b>: | Cardiovascular medicine                                                                                                                                                                                                                                                                                                                                                                                                                                                                                                                                                                                                                                                                                                                                                                                                                                           |
| Secondary Subject Heading:      | Cardiovascular medicine                                                                                                                                                                                                                                                                                                                                                                                                                                                                                                                                                                                                                                                                                                                                                                                                                                           |
| Keywords:                       | varicose vein, mortality, sex, age, cardiovascular risk                                                                                                                                                                                                                                                                                                                                                                                                                                                                                                                                                                                                                                                                                                                                                                                                           |
|                                 |                                                                                                                                                                                                                                                                                                                                                                                                                                                                                                                                                                                                                                                                                                                                                                                                                                                                   |

SCHOLARONE™  
Manuscripts

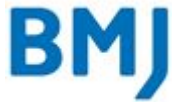

I, the Submitting Author has the right to grant and does grant on behalf of all authors of the Work (as defined in the below author licence), an exclusive licence and/or a non-exclusive licence for contributions from authors who are: i) UK Crown employees; ii) where BMJ has agreed a CC-BY licence shall apply, and/or iii) in accordance with the terms applicable for US Federal Government officers or employees acting as part of their official duties; on a worldwide, perpetual, irrevocable, royalty-free basis to BMJ Publishing Group Ltd ("BMJ") its licensees and where the relevant Journal is co-owned by BMJ to the co-owners of the Journal, to publish the Work in this journal and any other BMJ products and to exploit all rights, as set out in our [licence](#).

The Submitting Author accepts and understands that any supply made under these terms is made by BMJ to the Submitting Author unless you are acting as an employee on behalf of your employer or a postgraduate student of an affiliated institution which is paying any applicable article publishing charge ("APC") for Open Access articles. Where the Submitting Author wishes to make the Work available on an Open Access basis (and intends to pay the relevant APC), the terms of reuse of such Open Access shall be governed by a Creative Commons licence – details of these licences and which [Creative Commons](#) licence will apply to this Work are set out in our licence referred to above.

Other than as permitted in any relevant BMJ Author's Self Archiving Policies, I confirm this Work has not been accepted for publication elsewhere, is not being considered for publication elsewhere and does not duplicate material already published. I confirm all authors consent to publication of this Work and authorise the granting of this licence.

1  
2  
3  
4 **The severe varicose veins and the risk of mortality: A nationwide population-based cohort**  
5  
6 **study**  
7

8 Nan-Chun Wu<sup>a,b\*</sup>; Zhih-Cherng Chen<sup>c,d\*</sup>; I-Jung Fenge<sup>e</sup>; Chung-Han Ho<sup>e</sup>; Chun-Yen Chiang<sup>c,d</sup>;  
9  
10 Jhi-Joung Wang<sup>f</sup>; Wei-Ting Chang<sup>c,g,h</sup>  
11  
12

13 **Short title:** Outcomes of Varicose Veins  
14

15 <sup>a</sup> Department of Cardiovascular Surgery, Chi Mei Medical Center, Tainan, Taiwan  
16

17  
18 <sup>b</sup> Department of Hospital and Health Care Administration, Biotechnology, Chia-Nan University  
19  
20 of Pharmacy and Science, Tainan, Taiwan  
21

22 <sup>c</sup> Department of Cardiology, Chi Mei Medical Center, Tainan, Taiwan  
23

24 <sup>d</sup> Department of Pharmacy, Chia Nan University of Pharmacy and Science, Tainan City, Taiwan  
25

26  
27 <sup>e</sup> Department of Healthcare Administration and Medical Informatics, Chi Mei Medical Center,  
28  
29 Tainan, Taiwan  
30

31 <sup>f</sup> Department of Medical Research, Chi Mei Medical Center, Tainan, Taiwan  
32

33  
34 <sup>g</sup> Department of Biotechnology, Southern Taiwan University of Science and Technology, Tainan  
35  
36 710, Taiwan  
37

38  
39 <sup>h</sup> Institute of Clinical Medicine, College of Medicine, National Cheng Kung University, Tainan  
40  
41 70101, Taiwan  
42

43 \* Nan-Chun Wu and Zhih-Cherng Chen contributed to this article equally  
44

45 **Address for correspondence:** Wei-Ting Chang, MD,  
46

47  
48 901, Zhonghua Road, Yongkang District, Tainan, Taiwan (R.O.C.)  
49

50 Tel: +886-281-2811; Fax: +886-281-2811; E-mail: [cmevecho2@gmail.com](mailto:cmevecho2@gmail.com)  
51

52 **Word count of the Abstract:** 238 words  
53

54  
55 **Word count of the text:** 2936 words  
56



## Abstract

**Objective:** Varicose veins (VV) are common and although considered benign may cause morbidity. However, the association between VV severity and cardiovascular and mortality risks remains unknown. The aim of this study was to investigate the factors associated with overall mortality in patients with VV.

**Methods:** A total of 4644 patients with newly diagnosed VV between 1999 and 2013 were identified from Taiwan's National Health Insurance Database. VV severity was classified from grade 1 to 3 according to the presentation of ulcers or inflammation. Moreover, 9497, 2541 and 5722 age-, sex-, and chronic cardiovascular risk factor-matched controls, as assessed based on propensity score, were separately selected for 3 grading VV groups. Enrolled patients were analyzed using conditional Cox proportional hazards regression analysis to estimate risk of mortality and major cardiovascular adverse events (MACE) in the VV and control groups.

**Results:** Most patients with VV were free from systemic disease. However, compared with matched controls, patients with VV showed a 1.37-times increased risk of mortality (95% CI 1.19–1.57;  $p < 0.0001$ ). Compared with matched controls, older (age  $\geq 65$  years) (adjusted HR: 1.38; 95% CI: 1.17–1.62;  $p = 0.0001$ ) and male patients with VV (adjusted HR: 1.41; 95% CI: 1.18–1.68;  $p = 0.0001$ ) showed increased risk of mortality. Furthermore, compared with controls, patients with VV showed 2.05-times greater risk of MACE. Compared with matched controls, population at grade 3 increased 1.83 times risk of mortality and 2.04 to 38.42 times risk of heart failure, acute coronary syndrome, ischemic stroke and venous thromboembolism.

**Conclusions:** This nationwide cohort study demonstrated that patients with VV are at a risk of cardiovascular events and mortality. Our findings suggest that presence of VV warrants close

1  
2  
3  
4 attention in terms of prognosis and treatment.  
5

6 **Key words:** varicose vein, mortality, sex, age, cardiovascular risk  
7  
8  
9

### 10 **Strengths and limitations of this study**

- 11 1. The strengths of this study are its population-based design with a large sample size including  
12 study and control cohorts.
- 13 2. All insurance claims should be reviewed by medical reimbursement specialists.
- 14 3. However, some risk factors of varicose vein including smoking habits, lack of movement,  
15 overweight and glycated hemoglobin levels were not available in this database.
- 16 4. Our novel findings indicated that patients at severe grades of varicose vein had higher risks  
17 of mortality and major adverse cardiovascular events.
- 18 5. The presence of varicose vein should catch more awareness of potential co-existing risks of  
19 mortality and cardiovascular events.  
20  
21  
22  
23  
24  
25  
26  
27  
28  
29  
30  
31  
32  
33  
34  
35  
36  
37  
38  
39  
40  
41  
42  
43  
44  
45  
46  
47  
48  
49  
50  
51  
52  
53  
54  
55  
56  
57  
58  
59  
60

## Introduction

Varicose veins (VV) can be considered a common disease with prevalence ranging from 2% to 56% in the adult population.<sup>1</sup> Following clinical examination, VV diagnosis is primarily based on the presence of enlarged and twisted veins in the lower extremities.<sup>1,2</sup> Among people with VV, 1% to 4% of individuals show higher severity grades (Clinical–Etiological–Anatomical–Pathophysiological [CEAP] classification, 5–6).<sup>1,2</sup> Although VV lead to leg swelling, venous eczema, and ulceration in some cases, they are regarded as a benign disease.<sup>3,4</sup> Moreover, the association between the severity of VV and risk of future adverse events remains unknown. In fact, the majority of the previous studies have focused on the importance of superficial venous thrombosis or deep vein thrombosis (DVT).<sup>5</sup> In a 30-year cohort study, mortality risk among patients with DVT and pulmonary embolism (PE) was markedly higher than that in age and sex-matched patients, particularly within the first 30 days.<sup>6</sup> Similarly, another population-based case-control study demonstrated that having VV was a risk factor for venous thromboembolism, although the association of VV severity with survival and cardiovascular events remains unknown.<sup>7</sup> In addition, although age, family history, and female sex are the known risk factors for VV, the effects of underlying diseases or sex on outcomes of VV remain unclear.<sup>1</sup> We hypothesized that presence of VV can be used as a marker for cardiovascular risk. Therefore, the aim of this study was to investigate the association of VV with survival and cardiovascular outcomes.

## Methods

### *Data Source*

Taiwan launched a single-payer National Health Insurance (NHI) program on March 1, 1995. This database contains details of almost every Taiwanese resident (coverage rate >98% in 2009), making it one of the world's largest and most complete population-based sources. The data used in this study were retrieved from the Longitudinal Health Insurance Database 2000 (LHID2000)—a subset of the NHI database containing all claims data from 1996 to 2013, covering 1 million beneficiaries randomly selected in 2000. At that time, there were no significant differences in age, sex, and health care costs between patients with VV and matched controls. LHID2000 provided encrypted patient identification numbers; sex; date of birth; admission and discharge dates; International Classification of Diseases, Ninth Revision, Clinical Modification (ICD-9-CM) codes of diagnoses and procedures; prescription details; registry data in the Catastrophic Illness Patient Database; and costs covered and paid for by NHI. Details of the National Health Insurance Research Databases (NHIRD) are described in previous studies.<sup>8,9</sup> Moreover, the accuracy of major disease diagnoses in the NHIRD, including stroke and acute coronary syndrome, has been validated.<sup>9</sup> The present study was ethically approved by the Institutional Review Board of Chi-Mei Hospital (CV code: 10406-E01). All procedures followed the principles outlined in the Declaration of Helsinki.

### *Patient and Public Involvement*

No patient involved.

### *Study Design*

This nationwide population-based, retrospective cohort study was conducted to investigate the association between VV and subsequent mortality. Patients with at least 3 claims for outpatient VV diagnosis in 1 year or with 1 claim for inpatient VV diagnosis (ICD-9-CM codes

1  
2  
3  
4 454, 454.0, 454.1, 454.2, 454.8, and 454.9) were considered as VV cases. Patients with a first-  
5  
6 time diagnosis of VV from January 1999 to December 2012 were included in the cohort. Codes  
7  
8 for VV were considered reliable for diagnosis based on clinical symptoms. The date of the first-  
9  
10 time VV diagnosis was considered the index date in this study. To ensure accurate VV diagnosis,  
11  
12 and to avoid potentially confounding effects, patients with DVT (ICD-9-CM codes 453.40,  
13  
14 459.1, 671.4, 671.3, 451.83, 459.3, 453.4, and 451.11) or PE (ICD-9-CM codes 415.1, 415.11,  
15  
16 673, 673.2, and 673.8) in an ambulatory setting before the index date were excluded. In addition,  
17  
18 VV severity was categorized as grade 1 uncomplicated (ICD-9-CM code 454.9), grade 2 with  
19  
20 ulcer (ICD-9-CM code 454.0) or inflammation (ICD-9-CM code 454.1), and grade 3 with both  
21  
22 ulcer and inflammation (ICD-9-CM code 454.2).  
23  
24  
25  
26

27 Three control cohorts (n1=9497, n2=2541 and n3=5722; 4 control subjects for every  
28  
29 enrolled patient with VV), not diagnosed with VV from 1996 to 2013, were selected for three  
30  
31 VV grade groups separately. To eliminate potential selection bias, the controls were matched  
32  
33 using propensity score method at a 4:1 ratio for baseline characteristics of age, sex, and chronic  
34  
35 cardiovascular risk factors, including hypertension (ICD-9-CM codes 401–405, A260, A269,  
36  
37 4372), diabetes (ICD-9-CM codes 250, A181, A189, A229, A239, 3572, and 3620),  
38  
39 hyperlipidemia (ICD-9-CM code 272), and coronary artery disease (CAD; ICD-9-CM codes  
40  
41 410–414). The propensity scores (PS) for identified VV cases and controls were estimated using  
42  
43 the fitting logistic regression model. Based on greedy algorithm matching, 8 control subjects (the  
44  
45 nearest neighbor matching of VV) were selected as matched controls.<sup>10</sup> If a case failed to be  
46  
47 assigned to the 4 matched controls, it was dropped from the set of matches. In addition, since the  
48  
49 primary VV treatment was covered by insurance, it prevented VV from over-diagnosis. The  
50  
51 matched controls were assigned the same index date as that of the corresponding VV patient.  
52  
53  
54  
55  
56

## *Outcomes*

The primary outcome was mortality, and the secondary outcome was major cardiovascular adverse events (MACEs), including acute coronary syndrome (ACS, ICD-9-CM codes 410, 410.7, 411.1, 411.81, and 414.8), congestive heart failure (CHF, ICD-9-CM codes 428, 428.0, 428.1, 428.2, and 428.9), ischemic stroke (ICD-9-CM code 436), DVT, and PE. Mortality was identified using the “in-hospital death” or “discharge under critical condition” codes at discharge. Enrollment in the NHI program is mandatory for all people in Taiwan, and registration must be withdrawn within 30 days after death. Patients with the abovementioned mortality-related codes and those withdrawn from the NHI program within 30 days after discharge from the last hospitalization were presumed to have died. All subjects were followed up from the index date to death (lost to follow-up) or until December 31, 2013, whichever was earlier.

## *Validation of the Accuracy of VV Diagnosis and CEAP Grading*

To validate the accuracy of the VV diagnosis, we reviewed the charts of all patients (inpatients and outpatients) using ICD-9-CM diagnosis codes for VV who visited Chi-Mei Medical Center (Tainan, Taiwan) from 2010 to 2015. Our aim was to determine the accuracy and consistency of code usage. A vascular specialist reviewed patient discharge and clinical records. In addition to examining the accuracy of VV diagnosis, the reviewer compared CEAP stages with our ICD-9-CM–derived grades in inpatients. Subsequently, we further investigated the sensitivity, specificity, and predictive value of the ICD codes for clinical diagnosis, as well as the applicability of our VV grading system. In particular, as ICD-9-CM coding and VV descriptions are associated with insurance payment, the accuracy of VV diagnosis and the reliability of VV

1  
2  
3  
4 severity grading increased. The consistency between CEAP and grading stages were evaluated  
5  
6 by kappa score, whose value between 0.8 and 1.0 was considered as an almost perfect  
7  
8 agreement.  
9

### 10 11 *Statistical Analyses*

12  
13  
14 Continuous and categorical baseline characteristics between the case and control groups  
15  
16 were separately compared by standardized mean difference (SMD), an assessment approach for  
17  
18 evaluating the balance between variables after PS matching. SMD greater than 0.1 is considered  
19  
20 to denote a meaningful imbalance in variables.  
21

22  
23 Conditional Cox proportional hazards regression analysis was used to estimate the risk of  
24  
25 mortality and MACE in the VV and control groups. Adjusted hazard ratios (HRs) were estimated  
26  
27 by adjusting for chronic obstructive pulmonary disease (ICD-9-CM codes 490-496) , cancer  
28  
29 (ICD-9-CM codes 140-208), atrial fibrillation (ICD-9-CM codes 427.31), heart failure (ICD-9-  
30  
31 CM codes 428), ischemic heart disease (ICD-9-CM codes 410-414), chronic renal insufficiency  
32  
33 (ICD-9-CM codes 403, 404, 582, 585-588). Moreover, the investigation was extended to  
34  
35 stratified subgroup analysis. HRs between the VV and control groups were separately estimated  
36  
37 in subgroups of population aged <65 years or  $\geq 65$  years; males or females; and subgroups with  
38  
39 or without a diagnosis of hypertension, diabetes, hyperlipidemia, or CAD. The Kaplan-Meier  
40  
41 method was used to separately estimate the 3-, 6-, and 9-year survival rates in the control and  
42  
43 VV groups. Kaplan-Meier curves of mortality and MACE were plotted for controls and patients  
44  
45 with 3 grades of VV severity. Differences in survival curves between the control and VV groups  
46  
47 were examined using the log-rank test.  
48  
49  
50  
51

52  
53 With respect to mortality, CHF, ACS, ischemic stroke and DVT +PE endpoints, the risks  
54  
55

1  
2  
3  
4 for VV with 3 separate severity grades were further estimated by comparison against each  
5  
6 matched controls.  
7

8  
9 Finally, sensitivity analyses were conducted to determine the influence from subjects with  
10  
11 pregnancy history (ICD-9-CM codes V22, V23.2, 761.5), peripheral artery disease (PAD, ICD-  
12  
13 9-CM codes 440.0, 440.2, 440.3, 440.8, 440.9, 443, 444.0, 444.22, 444.8, 447.8, and 447.9)  
14  
15 medical history and patients treated with operations (ICD-9-CM procedure code 3859, 3889 and  
16  
17 NHIRD order code 69013, 69014, 69015, 69016, 69017, 69019, 69020, 69021) including  
18  
19 ligation and stripping procedures after VV diagnosis.  
20  
21

22 A two-tailed p value of  $<0.05$  was considered statistically significant. All analyses were  
23  
24 performed using the SAS software, version 9.4 (SAS Institute, Cary, NC) and Stata software  
25  
26 15.0 (StataCorp, College Station, TX.)  
27  
28

## 29 **Results**

### 30 *Characteristics of the Study Population*

31  
32 A total of 4644 patients with newly diagnosed VV were identified during January 1999 to  
33  
34 December 2012. Among them, 2467, 668 and 1509 VVs were separately classified into 1, 2 and  
35  
36 3 severity grade. For each VV group, age-, sex-, and chronic disease-matched patients without  
37  
38 VV were separately included for comparison. The covariates between VV and matched groups  
39  
40 are well balanced after propensity score matching. All patients were tracked from the index dates  
41  
42 until achieving the primary outcomes or the end of the study. The mean age of patients with VV  
43  
44 was  $55.70 \pm 16.03$  years, the majority of the patients were female (61.33%), and most of them  
45  
46 did not present with chronic diseases such as hypertension, diabetes, hyperlipidemia, and CAD  
47  
48 (Table 1). Significantly different distribution of age, sex and diabetes among three severity VV  
49  
50  
51  
52  
53  
54  
55



1  
2  
3  
4 groups were displayed (p-value < 0.05) (Supplementary Table 1). Interestingly, more female  
5  
6 patients (68.67%) were diagnosed with a lower severity (grade 1). Also, the baseline  
7  
8 characteristics and comorbid medical disorders for 3 grading VV groups and 3 separately  
9  
10 matched controls were listed in Supplement Table 2.  
11  
12  
13  
14  
15

### 16 *Long-Term Mortality Risk*

17  
18 Compared with matched controls, the outcomes of patients with VV were worse. The  
19  
20 estimated survival at 3, 6, and 9 years were 97.6%, 95.6%, and 93.5%, respectively, in patients  
21  
22 with VV compared with 98.5%, 97.1%, and 95.6%, respectively, in controls (Figure 1A). A log-  
23  
24 rank test revealed a significant difference in survival curves of patients with VV and controls (p  
25  
26 <0.0001). The survival curves of controls and patients with different severities of VV are  
27  
28 presented in Figure 1B. Lower survival rates over time were observed in patients with highest  
29  
30 VV severity (grades 3) but not in those with grade 1-2. Significant difference between survival  
31  
32 curves between VV grading 3 and corresponding controls were revealed by log rank test (p <  
33  
34 0.0001). However, there is no significant difference were found between survival curves of  
35  
36 patients with VV severity grades (1-2) and corresponding controls (grade 1: p = 0.3191; grade 2:  
37  
38 p=0.3599).  
39  
40  
41  
42  
43

44 Overall, HR of all-cause mortality adjusted for chronic obstructive pulmonary disease,  
45  
46 cancer, atrial fibrillation, heart failure, ischemic heart disease, chronic renal insufficiency in  
47  
48 patients with VV was 1.34 times higher (adjusted HR: 1.37; 95% CI: 1.19–1.57; p < 0.0001) than  
49  
50 that in controls (Table 2). Stratified analysis revealed 1.38- and 1.41-times increased risks of  
51  
52 mortality in older (age  $\geq$  65 years; adjusted HR: 1.38; 95% CI: 1.17–1.62; p = 0.0001) and male  
53  
54  
55

1  
2  
3  
4 patients with VV (adjusted HR: 1.41; 95% CI: 1.18–1.68;  $p = 0.0001$ ). Notably, despite no  
5  
6 significant effect of VV on the survival of patients with hypertension, hyperlipidemia or  
7  
8 coronary artery disease, patients with both VV and diabetes presented 1.50 times higher risk of  
9  
10 mortality compared with those without VV (adjusted HR: 1.50; 95% CI: 1.05–2.15;  $p = 0.0254$ ).  
11  
12 Furthermore, VV at grade 3 show 1.83 (95% CI : 1.48, 2.27 ;  $p < 0.0001$ ) greater risk of  
13  
14 mortality under the control of chronic obstructive pulmonary disease, cancer, atrial fibrillation,  
15  
16 heart failure, ischemic heart disease, chronic renal insufficiency.  
17  
18  
19  
20  
21  
22  
23

### 24 *Long-Term MACE risk*

25  
26 MACE risk significantly increased in patients with VV (HR: 2.05; 95% CI: 1.89–2.23;  $p <$   
27  
28 0.0001), particularly in relatively younger (age,  $<65$  years; adjusted HR: 2.17; 95% CI: 1.92–  
29  
30 2.46;  $p < 0.0001$ ) or male (adjusted HR: 2.32; 95% CI: 2.06–2.62;  $p < 0.0001$ ) patients (Table 3).  
31  
32 In addition, patients with VV showing cardiovascular risk factors, including hypertension,  
33  
34 diabetes, hyperlipidemia, and CAD, were at a higher risk of MACE than were matched controls.  
35  
36 In patients with VV, 3-, 6-, and 9-year MACE-free rates were 91.17%, 84.99%, and 79.27%,  
37  
38 respectively (Figure 2A). These rates dramatically declined further with disease severity (Figure  
39  
40 2B). In terms of individual cardiovascular outcomes, patients with grade 3 VV were at a greater  
41  
42 risk of CHF (adjusted HR: 2.05; 95% CI: 1.71–2.46;  $p < 0.0001$ ), ACS (adjusted HR: 2.04; 95%  
43  
44 CI: 1.58–2.63;  $p < 0.0001$ ), and ischemic stroke (adjusted HR: 2.06; 95% CI: 1.58–2.69;  $p <$   
45  
46 0.0001) than were controls (Table 4). In particular, with the highest VV severity there was an  
47  
48 increasing risk of venous thrombotic events, including DVT and PE (Grade 3: adjusted HR:  
49  
50 38.42; 95% CI, 16.38–90.13;  $p < 0.0001$ ) (Table 4).  
51  
52  
53  
54  
55

### *Validation of the Accuracy of VV Diagnosis and ICD-9-CM–Derived VV Grading*

During 2010–2015 a total of 2202 outpatients and 347 inpatients were reported to have VV in Chi-Mei Medical Center. Among the outpatients, 1188 were coded as uncomplicated VV (ICD-9-CM code 454.9), 775 were coded as VV with inflammation (ICD-9-CM code 454.1), 152 were coded as VV with ulcers (ICD-9-CM code 454.0), and 87 were coded as VV with ulcer and inflammation (ICD-9-CM code 454.2) (Supplement Table 3). Notably, none were coded incorrectly. Compared with CEAP stage, as determined based on chart reviews, only a few inpatients were incorrectly or unclearly diagnosed using ICD-9-CM–derived VV codes (Supplement Table 4). For example, among patients with higher VV grades (CEAP stage 5–6), the positive and negative predictive values with ICD-9-CM–derived codes were 93% and 98.4%, respectively. Specifically, the sensitivity and specificity of ICD-9-CM–derived grading were up to 95.2% and 97.6%, respectively. The calculated kappa score between CEAP stages and grading severity is 0.918 (95%CI = [0.878, 0.957]).

### *Sensitivity analyses*

VV and controls with pregnancy history were identified and exam the influence in sensitivity analysis (Supplement Table 5). After additionally adjustment for history of pregnancy, the results remain showing great impacts on mortality and MACE (adjusted HR for death (95%CI) = 1.37 (1.19, 1.57), p-value<0.0001; adjusted HR for MACE (95%CI) = 2.01 (1.89, 2.23), p-value<0.0001).

After excluding 472 subjects with Myocardial infarction, stroke, coronary angioplasty or

1  
2  
3  
4 CABG, remaining VV and corresponding controls were included for sensitivity analysis.  
5

6 Comparing with corresponding matched controls, those conservatively treated VV patients were  
7  
8 found 1.36 times risks of mortality (adjusted HR (95%CI) = 1.362 (1.18, 1.57), p-value<0.0001)  
9  
10 and 1.95 times risks of MACE (adjusted HR (95%CI) = 1.95 (1.80, 2.12), p-value<0.0001).  
11  
12  
13  
14

## 15 16 **Discussion**

17  
18 The primary findings of this study were that (1) patients with VV were at increasing risks of  
19  
20 mortality and cardiovascular events, especially those with VV at grade 3 compared with matched  
21  
22 controls; (2) having VV had a significant impact on the survival of male patients. To the best of  
23  
24 our knowledge, this nationwide population-based study is the first to comprehensively describe  
25  
26 the association of VV with patients' cardiovascular outcomes.  
27  
28

29  
30 Although VV are common, their potential threat to health has not been well investigated  
31  
32 previously.<sup>1,2</sup> Valve dysfunction-mediated activation of leukocytes, release of enzymes, and  
33  
34 remodeling of the vascular wall lead to venous valve destruction and incompetence.<sup>11</sup> VV may  
35  
36 cause inflammation, edema, ulcers,<sup>11</sup> endothelial dysfunction,<sup>12</sup> and subsequent DVT.<sup>5</sup> In  
37  
38 addition, overexpression of inducible nitric oxide synthase and transforming growth factor- $\beta$ 1  
39  
40 has been documented in patients with VV.<sup>13</sup> In this study, the risk of all-cause mortality and  
41  
42 MACE was higher in patients with VV than it was in matched controls, indicating that VV-  
43  
44 induced systemic inflammation may be associated with cardiovascular events regardless of the  
45  
46 development of venous thromboembolic events. Notably, the lower survival rates were observed  
47  
48 in patients with highest VV severity but not in those with grade 1-2. This also reflects that the  
49  
50 chronic inflammation induced by a higher grade of VV may be associated with increasing  
51  
52  
53  
54  
55

1  
2  
3  
4 mortality and MACEs. However, only a few studies have compared development of VV with  
5  
6 arterial disease and reported inconsistent findings.<sup>2,14</sup> A previous study in Finland has reported a  
7  
8 two-fold higher incidence of new arterial disease in individuals with VV than in those without it,  
9  
10 although the incidence of new hypertension was similar.<sup>14,15</sup> Thus, VV and arterial disease may  
11  
12 have a common etiology, but VV were not related to hypertension. Furthermore, Chang et al.  
13  
14 have reported the association of VV with the incidence of venous thromboembolism and  
15  
16 peripheral artery disease.<sup>16</sup> Reportedly, myocardial infarction and heart failure increase the risk  
17  
18 of thromboembolism.<sup>17</sup> In contrast, patients with thromboembolic events were at a higher risk of  
19  
20 subsequent myocardial infarction and stroke.<sup>18</sup> However, whether this association is causal or  
21  
22 represents common risk factors warrants further research. Notably, compared with controls,  
23  
24 patients with VV were at a higher risk of mortality independent of age and sex. Specifically, the  
25  
26 significant impact of VV was observed in male patients. In previous research, older age and  
27  
28 female sex were found to be the most relevant risk factors for VV.<sup>1</sup> VV incidence increases with  
29  
30 increasing age. However, Heit et al. have reported that younger patients with VV were at a  
31  
32 significantly increased risk of subsequent DVT, whereas the risk was attenuated with increasing  
33  
34 age.<sup>19</sup> Similarly, Lohr et al also reviewed that Although a lower grade of VV (CEAP 2-3) has  
35  
36 been observed in 50.5% of females and in 30.1% of males, a higher grade of VV with trophic  
37  
38 skin changes (CEAP 4-6) were found in 2.8% of females and 5.4% of males.<sup>20</sup> Also, DVT was  
39  
40 more common in males compared with females (11.3% vs 7.8%).<sup>20</sup> Earlier onset of VV in the  
41  
42 younger population implies a higher risk of concomitant arterial diseases or systemic  
43  
44 inflammations. As described previously, female sex, pregnancy, and predominately being in the  
45  
46 sitting posture are risk factors for VV.<sup>21</sup> However, despite the valid correlation between use of  
47  
48 estrogen supplements and DVT, whether sex hormones contribute to the development of VV  
49  
50  
51  
52  
53  
54  
55  
56

1  
2  
3  
4 remains unclear.  
5  
6

7  
8 There were several strengths of this study. First, we included an unselected, large,  
9 nationwide cohort of patients with VV. By including the data of 4644 patients over a 12-year  
10 period, this study provided adequate statistical power for the analysis of long-term outcomes for  
11 VV. Second, we compared the VV cohort with a matched, VV-free cohort, which helped  
12 distinguish the characteristics of the VV population in terms of survival and outcomes. Third,  
13 among patients with VV, the effects of sex on mortality and MACE were emphasized because  
14 VV may have been ignored in these specific populations. Forth, we included patients presenting  
15 with VV of various severity grades, which allowed for a comprehensive investigation of overall  
16 effects of severity. Finally, a recently published article evaluated and supported the accuracy of  
17 several major outcomes, including MI, hypertension, diabetes, stroke, CHF and VV, in  
18 NHIRD.<sup>22</sup>  
19  
20  
21  
22  
23  
24  
25  
26  
27  
28  
29  
30  
31

32  
33 However, this study had several limitations. According to previous meta-analysis and  
34 research, smoking habits, quality of life, lack of movement, pregnancy history, overweight and  
35 glycated hemoglobin levels are considered VV risk factors, with some of these being related to  
36 increased mortality risk. Although NHIRD provides a complete clinical medical history over  
37 decades for 1 million people, currently the NHIRD lacks information regarding people's lifestyle  
38 and clinical laboratory test results. Therefore, the selected confounders in this study were limited  
39 to age, sex, and four chronic cardiovascular risk factors. The small corresponding area under the  
40 receiver operating characteristic curve indicated that the relevant confounders were not  
41 appropriately identified. To explore the effects of VV on mortality and MACE with minimum  
42 confounding bias, a future study including more comprehensive VV-related risk factors is  
43  
44  
45  
46  
47  
48  
49  
50  
51  
52  
53  
54  
55

imperative. Second, the miscoding of VV severity may have led to the exclusion of cases. This might explain why 47% of the included patients are with advanced venous disease (Grade 2 or 3), different from the general distribution of disease severity. Nevertheless, to overcome the inherent limitations, we verified the accuracy of VV diagnosis using chart review by a specialist. Overall, both the validation methods indicated a satisfactory accuracy of VV coding in the NHI database. Third, owing to difficulties in completing CEAP staging according to ICD-9, we established our own grading system. However, even though this novel ICD-9-CM–derived grading system clearly differentiated patients with various severities, it remained different from the generally applied CEAP staging system and disease progression could hardly be represented. Similarly, to validate the reliability of the ICD-9-CM–derived grading system, we reviewed medical records of inpatients with VV and observed satisfactory sensitivity and specificity. Forth, while ligation and stripping surgeries may affect the outcomes, through excluding patients receiving surgical treatment for VV we performed sensitivity test. It also revealed significant increases of risks of mortality and MACE in patients with VV compared with risks in the matched controls. Likewise, after excluding the potential influences of peripheral artery disease, we also found great impacts of mortality and MACE in the population with VV. Finally, increased mortality with higher ICD-9-CM–derived grades indicated that our grading system specifically reflected the severity of VV but the cause of mortality was not available in this database. .

## Conclusions

VV are a common condition typically believed to be benign; however, our results suggest

1  
2  
3  
4 that they warrant close attention. Compared with matched controls, patients with VV were at  
5  
6 increasing risks of mortality and cardiovascular events, especially those with VV at grade 3.

7  
8 Therefore, these findings should alert clinicians regarding the importance of detecting VV at an  
9  
10 early stage.  
11

## 12 **Author Contributions**

13  
14  
15  
16  
17 All authors contributed to the revision of the manuscript and approved the final version. All  
18  
19 agreed to be accountable. NC Wu contributed to concept and design, critical revision. ZC Chen  
20  
21 contributed to data collection and critical revision. IJ Feng contributed to critical revision, data  
22  
23 collection, statistical analysis and interpretation. CH Ho contributed to critical revision, data  
24  
25 collection, statistical analysis and interpretation. CY Chiang contributed to data collection and  
26  
27 critical revision. JJ Wang contributed to data collection and critical revision. WT Chang  
28  
29 contributed to concept and design, data collection, interpretation, manuscript writing and critical  
30  
31 revision.  
32  
33  
34  
35

36 **Disclosure:** None

37  
38  
39 **Funding:** We received the research grant supported by Chi-Mei Medical Center

40  
41  
42  
43 **Data availability:** All the data is available in National Health Insurance Research Database  
44  
45 (NHIRD) in Taiwan  
46  
47

## 48 **References**

- 49  
50  
51  
52 1. Beebe-Dimmer JL, Pfeifer JR, Engle JS, Schottenfeld D. The epidemiology of chronic  
53  
54 venous insufficiency and varicose veins. *Annals of epidemiology* 2005;15:175-84.  
55



- 1  
2  
3  
4 2. Cesarone MR, Belcaro G, Nicolaides AN, Geroulakos G, Griffin M, Incandela L, et al.  
5  
6 'Real' epidemiology of varicose veins and chronic venous diseases: the San Valentino  
7  
8 Vascular Screening Project. *Angiology* 2002;53:119-30.  
9  
10
- 11  
12 3. Eberhardt RT, Raffetto JD. Chronic venous insufficiency. *Circulation*.2014;130:333-46.  
13  
14
- 15 4. Nicolaides AN. Investigation of chronic venous insufficiency: A consensus statement  
16  
17 (France, March 5-9, 1997). *Circulation* 2000;102:E126-63.  
18  
19
- 20 5. Muller-Buhl U, Leutgeb R, Engeser P, Achankeng EN, Szecsenyi J, Laux G. Varicose  
21  
22 veins are a risk factor for deep venous thrombosis in general practice patients. *VASA*  
23  
24 2012;41:360-5.  
25  
26
- 27 6. Sogaard KK, Schmidt M, Pedersen L, Horvath-Puho E, Sorensen HT. 30-year mortality  
28  
29 after venous thromboembolism: a population-based cohort study. *Circulation*  
30  
31 2014;130:829-36.  
32  
33
- 34 7. Heit JA, Silverstein MD, Mohr DN, Petterson TM, O'Fallon WM, Melton LJ, 3rd. Risk  
35  
36 factors for deep vein thrombosis and pulmonary embolism: a population-based case-  
37  
38 control study. *Arch Intern Med* 2000;160:809-15.  
39  
40  
41
- 42 8. Chang CH, Lin CH, Caffrey JL, Lee YC, Liu YC, Lin JW, et al. Risk of Intracranial  
43  
44 Hemorrhage From Statin Use in Asians: A Nationwide Cohort Study. *Circulation*  
45  
46 2015;131:2070-8.  
47  
48  
49
- 50 9. Cheng CL, Kao YH, Lin SJ, Lee CH, Lai ML. Validation of the National Health  
51  
52 Insurance Research Database with ischemic stroke cases in Taiwan.  
53  
54  
55

- 1  
2  
3  
4 *Pharmacoepidemiology and drug safety* 2011;20:236-42.  
5  
6  
7  
8 10. Peter C. Austin, “An introduction to propensity score methods for reducing the effects of  
9 confounding in observational studies”, *Multivariate Behav Res.* 2011 May; 46(3): 399–  
10 424  
11  
12  
13  
14  
15 11. Markovic JN, Shortell CK. Genomics of varicose veins and chronic venous insufficiency.  
16 *Semin Vasc Surg* 2013;26:2-13.11.  
17  
18  
19  
20 12. Komarów W, Hawro P, Lekston A, Urbanek T, Zagrodzki P. Endothelial dysfunction in  
21 patients with chronic venous disease: an evaluation based on the flow-mediated dilatation  
22 test. *Int Angiol.* 2015;34:36-42.  
23  
24  
25  
26  
27  
28 13. Jacob T, Hingorani A, Ascher E. Overexpression of transforming growth factor-beta 1  
29 correlates with increased synthesis of nitric oxide synthase in varicose veins. *J Vasc Surg*  
30 2005;41:523-30.  
31  
32  
33  
34  
35  
36 14. Makivaara LA, Ahti TM, Luukkaala T, Hakama M, Laurikka JO. Persons with varicose  
37 veins have a high subsequent incidence of arterial disease: a population-based study in  
38 Tampere, Finland. *Angiology* 2007;58:704-9.  
39  
40  
41  
42  
43  
44 15. Piazza G, Goldhaber SZ. Venous thromboembolism and atherothrombosis: an integrated  
45 approach. *Circulation* 2010;121:2146-50.  
46  
47  
48  
49 16. Chang SL, Huang YL, Lee MC, Hu S, Hsiao YC, Chang SW, et al.  
50 Association of Varicose Veins With Incident Venous Thromboembolism and Peripheral  
51 Artery Disease. *JAMA.* 2018 Feb 27;319(8):807-817.  
52  
53  
54  
55

- 1  
2  
3  
4 17. Sørensen HT, Horvath-Puho E, Lash TL, Christiansen CF, Pesavento R, Pedersen L, et  
5  
6 al. Heart disease may be a risk factor for pulmonary embolism without peripheral deep  
7  
8 venous thrombosis. *Circulation* 2011;124:1435-41.  
9  
10  
11  
12 18. Sorensen HT, Horvath-Puho E, Pedersen L, Baron JA, Prandoni P. Venous  
13  
14 thromboembolism and subsequent hospitalisation due to acute arterial cardiovascular  
15  
16 events: a 20-year cohort study. *Lancet* 2007;370:1773-9.  
17  
18  
19  
20 19. Heit JA, Silverstein MD, Mohr DN, Petterson TM, O'Fallon WM, Melton LJ 3rd. Risk  
21  
22 factors for deep vein thrombosis and pulmonary embolism: a population-based case-  
23  
24 control study. *Arch Intern Med.* 2000;160:809-15  
25  
26  
27  
28 20. Lohr JM, Bush RL. Venous disease in women: epidemiology, manifestations,  
29  
30 and treatment. *J Vasc Surg.* 2013;57(4 Suppl):37S-45S.  
31  
32  
33  
34 21. Fowkes FG, Lee AJ, Evans CJ, Allan PL, Bradbury AW, Ruckley CV. Lifestyle risk  
35  
36 factors for lower limb venous reflux in the general population: Edinburgh Vein Study. *Int*  
37  
38 *J Epidemiol* 2001;30:846-52.  
39  
40  
41  
42  
43 22. Hsieh CY, Su CC, Shao SC, Sung SF, Lin SJ, Kao Yang YH, et al. Taiwan's National  
44  
45 Health Insurance Research Database: past and future. *Clin Epidemiol.* 2019;11:349-358  
46  
47  
48  
49  
50  
51  
52  
53  
54  
55

## Figure legends

**Figure 1.** (A) Kaplan-Meier estimates of 12-year survival between patients with varicose veins (VV) and the matched control cohort. (B) Kaplan-Meier estimates of 12-year survival between patients with VV categorized by the disease severities and the matched control cohort.

**Figure 2.** (A) Kaplan-Meier estimates of 12-year free from MACE between patients with varicose veins (VV) and the matched control cohort. (B) Kaplan-Meier estimates of 12-year free from MACE between patients with VV categorized by the disease severities and the matched control cohort.

**Table 1.** Baseline characteristics and comorbid medical disorders for the control cohort and patients with varicose vein (VV).

| Characteristic, n (%)          | Varicose vein, n = 4644 | Matched controls, n = 17742 | Standardized difference |
|--------------------------------|-------------------------|-----------------------------|-------------------------|
| <b>Age (years)</b>             |                         |                             | 0.02275                 |
| < 65                           | 3164 (68.13)            | 12275 (69.19)               |                         |
| ≥ 65                           | 1480 (31.87)            | 5467 (30.81)                |                         |
| <b>Age(mean±SD)</b>            | 55.70 ± 16.03           | 56.10 ± 16.04               | 0.02514                 |
| <b>Gender</b>                  |                         |                             | 0.00944                 |
| Male                           | 1796 (38.67)            | 6780 (38.21)                |                         |
| Female                         | 2848 (61.33)            | 10962 (61.79)               |                         |
| <b>Hypertension</b>            |                         |                             | 0.04519                 |
| No                             | 3750 (80.75)            | 14637 (82.50)               |                         |
| Yes                            | 894 (19.25)             | 3105 (17.50)                |                         |
| <b>Diabetes</b>                |                         |                             | 0.05807                 |
| No                             | 4247 (91.45)            | 16501 (93.01)               |                         |
| Yes                            | 397 (8.55)              | 1241 (6.99)                 |                         |
| <b>Hyperlipidemia</b>          |                         |                             | 0.08429                 |
| No                             | 4413 (95.03)            | 17157 (96.70)               |                         |
| Yes                            | 231 (4.97)              | 585 (3.30)                  |                         |
| <b>Coronary artery disease</b> |                         |                             | 0.07832                 |
| No                             | 4489 (96.66)            | 17375 (97.93)               |                         |
| Yes                            | 155 (3.34)              | 367 (2.07)                  |                         |

P-value was calculated based on the two sample t test and Pearson's chi-square test.

**Table 2.** Crude and adjusted hazard ratios of all-cause mortality in patients with VV compared with the matched control cohort during the follow-up period.

| Cohort<br>All (n =22386)       | Crude HR (95% CI)    | p-value   | Adjusted HR (95% CI)* | p-value  |
|--------------------------------|----------------------|-----------|-----------------------|----------|
| <b>Overall analysis</b>        |                      |           |                       |          |
| VV                             | 1.431 (1.247, 1.643) | <0.0001†  | 1.367 (1.189, 1.572)  | <0.0001† |
| Controls                       | 1[reference]         |           | 1[reference]          |          |
| <b>Stratified analysis</b>     |                      |           |                       |          |
| <b>Age (years)</b>             |                      |           |                       |          |
| <b>&lt; 65 (years)</b>         |                      |           |                       |          |
| VV                             | 1.487 (1.144, 1.932) | 0.0030†   | 1.202 (0.918, 1.574)  | 0.1803   |
| Controls                       | 1[reference]         |           | 1[reference]          |          |
| <b>≥65 (years)</b>             |                      |           |                       |          |
| VV                             | 1.411 (1.199, 1.660) | < 0.0001† | 1.377 (1.169, 1.623)  | 0.0001†  |
| Controls                       | 1[reference]         |           | 1[reference]          |          |
| <b>Gender</b>                  |                      |           |                       |          |
| <b>Male</b>                    |                      |           |                       |          |
| VV                             | 1.462 (1.229, 1.738) | < 0.0001† | 1.408 (1.182, 1.677)  | 0.0001†  |
| Controls                       | 1[reference]         |           | 1[reference]          |          |
| <b>Female</b>                  |                      |           |                       |          |
| VV                             | 1.381 (1.098, 1.736) | 0.0058†   | 1.308 (1.038, 1.648)  | 0.0227†  |
| Controls                       | 1[reference]         |           | 1[reference]          |          |
| <b>Hypertension</b>            |                      |           |                       |          |
| VV                             | 1.138 (0.869, 1.492) | 0.3476    | 1.157 (0.880, 1.522)  | 0.2957   |
| Controls                       | 1[reference]         |           | 1[reference]          |          |
| <b>Diabetes</b>                |                      |           |                       |          |
| VV                             | 1.504 (1.059, 2.137) | 0.0226†   | 1.503 (1.051, 2.148)  | 0.0254†  |
| Controls                       | 1[reference]         |           | 1[reference]          |          |
| <b>Hyperlipidemia</b>          |                      |           |                       |          |
| VV                             | 0.992 (0.387, 2.542) | 0.9865    | 1.005 (0.387, 2.610)  | 0.9914   |
| Controls                       | 1[reference]         |           | 1[reference]          |          |
| <b>Coronary artery disease</b> |                      |           |                       |          |
| VV                             | 1.140 (0.640, 2.029) | 0.6565    | 1.051 (0.575, 1.922)  | 0.8716   |
| Controls                       | 1[reference]         |           | 1[reference]          |          |

HR = Hazard Ratio; CI = Confidence Interval

†p<0.05

\*Adjusted for chronic obstructive pulmonary disease, cancer, atrial fibrillation, heart failure, ischemic heart disease, chronic renal insufficiency

**Table 3.** Crude and adjusted hazard ratios of major cardiovascular events (MACE) in patients with VV compared with the matched control cohort during the follow-up period

| Cohort<br>All (n =22386)       | Crude HR (95% CI)    | p-value   | Adjusted HR (95% CI)* | p-value   |
|--------------------------------|----------------------|-----------|-----------------------|-----------|
| <b>Overall analysis</b>        |                      |           |                       |           |
| VV                             | 2.075 (1.912, 2.251) | < 0.0001† | 2.053 (1.891, 2.228)  | < 0.0001† |
| Controls                       | 1[reference]         |           | 1[reference]          |           |
| <b>Stratified analysis</b>     |                      |           |                       |           |
| <b>Age (years)</b>             |                      |           |                       |           |
| <b>&lt; 65 (years)</b>         |                      |           |                       |           |
| VV                             | 2.207 (1.949, 2.499) | < 0.0001† | 2.171 (1.916, 2.461)  | < 0.0001† |
| Controls                       | 1[reference]         |           | 1[reference]          |           |
| <b>≥65 (years)</b>             |                      |           |                       |           |
| VV                             | 1.981 (1.778, 2.208) | < 0.0001† | 1.958 (1.756, 2.184)  | < 0.0001† |
| Controls                       | 1[reference]         |           | 1[reference]          |           |
| <b>Gender</b>                  |                      |           |                       |           |
| <b>Male</b>                    |                      |           |                       |           |
| VV                             | 2.352 (2.087, 2.651) | < 0.0001† | 2.322 (2.059, 2.618)  | < 0.0001† |
| Controls                       | 1[reference]         |           | 1[reference]          |           |
| <b>Female</b>                  |                      |           |                       |           |
| VV                             | 1.866 (1.668, 2.087) | < 0.0001† | 1.853 (1.656, 2.074)  | < 0.0001† |
| Controls                       | 1[reference]         |           | 1[reference]          |           |
| <b>Hypertension</b>            |                      |           |                       |           |
| VV                             | 1.649 (1.418, 1.917) | < 0.0001† | 1.621 (1.394, 1.885)  | < 0.0001† |
| Controls                       | 1[reference]         |           | 1[reference]          |           |
| <b>Diabetes</b>                |                      |           |                       |           |
| VV                             | 1.397 (1.111, 1.757) | 0.0042†   | 1.366 (1.084, 1.721)  | 0.0081    |
| Controls                       | 1[reference]         |           | 1[reference]          |           |
| <b>Hyperlipidemia</b>          |                      |           |                       |           |
| VV                             | 1.495 (1.028, 2.175) | 0.0353†   | 1.561 (1.065, 2.289)  | 0.0224    |
| Controls                       | 1[reference]         |           | 1[reference]          |           |
| <b>Coronary artery disease</b> |                      |           |                       |           |
| VV                             | 1.932 (1.380, 2.704) | 0.0001†   | 1.991 (1.407, 2.818)  | 0.0001†   |
| Controls                       | 1[reference]         |           | 1[reference]          |           |

HR = Hazard Ratio; CI = Confidence Interval

†p&lt;0.05

\*Adjusted for chronic obstructive pulmonary disease, cancer, atrial fibrillation, heart failure,

1  
2  
3  
4 ischemic heart disease, chronic renal insufficiency  
5  
6  
7  
8  
9  
10  
11  
12  
13  
14  
15  
16  
17  
18  
19  
20  
21  
22  
23  
24  
25  
26  
27  
28  
29  
30  
31  
32  
33  
34  
35  
36  
37  
38  
39  
40  
41  
42  
43  
44  
45  
46  
47  
48  
49  
50  
51  
52  
53  
54  
55  
56  
57  
58  
59  
60

For peer review only



**Table 4.** The adjusted hazard ratios of mortality and major cardiovascular adverse events (MACE) in patients with VV compared with the matched control cohort during the follow-up period.

|                                           | Grade 1 Control | Grade 1                     | Grade 2 Control | Grade 2                    | Grade 3 Control | Grade 3                      |
|-------------------------------------------|-----------------|-----------------------------|-----------------|----------------------------|-----------------|------------------------------|
| No. of mortality, N (%)                   | 343 (3.62)      | 99 (4.01)                   | 147 (5.79)      | 44 (6.59)                  | 266 (4.65)      | 136 (9.01)                   |
| Adjusted HR for mortality (95% CI)*       | Referent        | 1.083<br>(0.864, 1.358)     | Referent        | 1.133<br>(0.800, 1.603)    | Referent        | 1.833<br>(1.481, 2.269) †    |
| No. of CHF, N (%)                         | 552 (5.82)      | 238 (9.65)                  | 181 (7.12)      | 80 (11.98)                 | 358 (6.26)      | 190 (12.59)                  |
| Adjusted HR for CHF (95% CI)*             | Referent        | 1.680<br>(1.439, 1.961)†    | Referent        | 1.792<br>(1.369, 2.345)†   | Referent        | 2.050<br>(1.711, 2.456) †    |
| No. of ACS, N (%)                         | 291 (3.07)      | 125 (5.07)                  | 72 (2.83)       | 24 (3.59)                  | 174 (3.04)      | 95 (6.30)                    |
| Adjusted HR for ACS (95% CI)*             | Referent        | 1.702<br>(1.376, 2.106)†    | Referent        | 1.247<br>(0.780, 1.992)    | Referent        | 2.038<br>(1.576, 2.634) †    |
| No. of ischemic stroke, N (%)             | 236 (2.49)      | 99 (4.01)                   | 90 (3.54)       | 31 (4.64)                  | 162 (2.83)      | 89 (5.90)                    |
| Adjusted HR for ischemic stroke (95% CI)* | Referent        | 1.586<br>(1.250, 2.011)†    | Referent        | 1.400<br>(0.925, 2.118)    | Referent        | 2.063<br>(1.583, 2.687) †    |
| No. of DVT +PE, N (%)                     | 14 (0.15)       | 56 (2.27)                   | 7 (0.28)        | 13 (1.95)                  | 6 (0.10)        | 63 (4.17)                    |
| Adjusted HR for DVT+PE (95% CI)*          | Referent        | 14.896<br>(8.260, 26.863) † | Referent        | 6.269<br>(2.462, 15.959) † | Referent        | 38.419<br>(16.376, 90.133) † |

†p<0.05; HR = Hazard Ratio; CI = Confidence Interval; CHF=congestive heart failure; ACS= acute coronary syndrome; DVT = deep vein thrombosis; PE= pulmonary embolism

\*Adjusted for chronic obstructive pulmonary disease, cancer, atrial fibrillation, heart failure, ischemic heart disease, chronic renal insufficiency

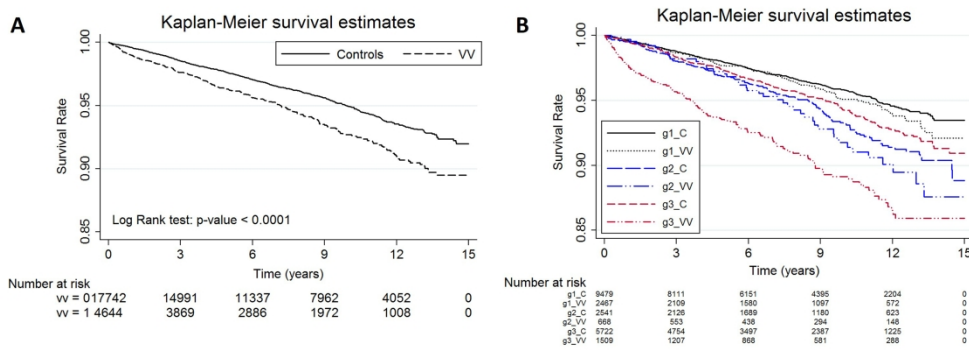

Figure 1. (A) Kaplan-Meier estimates of 12-year survival between patients with varicose veins (VV) and the matched control cohort. (B) Kaplan-Meier estimates of 12-year survival between patients with VV categorized by the disease severities and the matched control cohort.

520x194mm (300 x 300 DPI)

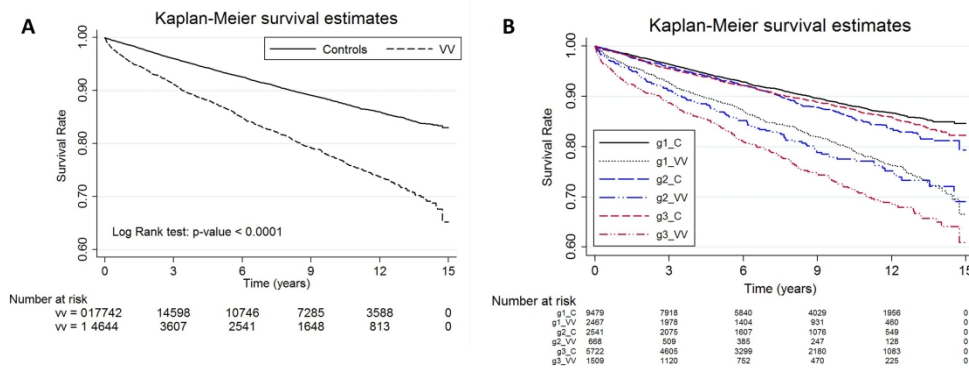

Figure 2. (A) Kaplan-Meier estimates of 12-year free from MACE between patients with varicose veins (VV) and the matched control cohort. (B) Kaplan-Meier estimates of 12-year free from MACE between patients with VV categorized by the disease severities and the matched control cohort.

545x208mm (300 x 300 DPI)

**Supplementary Table 1.** Clinical characteristics and comorbid medical disorders for patients with VV categorized by the disease severity.

| Characteristic                      | Grade 1, n=2467   | Grade 2, n=668    | Grade 3, n=1509   | P-value  |
|-------------------------------------|-------------------|-------------------|-------------------|----------|
| <b>n (%)</b>                        |                   |                   |                   |          |
| <b>Age (years)</b>                  |                   |                   |                   | < 0.0001 |
| $\geq 65$                           | 1756 (71.18)      | 428 (64.07)       | 529 (35.06)       |          |
| < 65                                | 711 (28.82)       | 240 (35.93)       | 980 (64.94)       |          |
| <b>Age (mean<math>\pm</math>SD)</b> | 55.57 $\pm$ 14.76 | 57.20 $\pm$ 17.45 | 56.50 $\pm$ 17.31 |          |
| <b>Gender</b>                       |                   |                   |                   | 0.0332   |
| Male                                | 773 (31.33)       | 277 (41.47)       | 746 (49.44)       |          |
| Female                              | 1694 (68.67)      | 391 (58.53)       | 763 (50.56)       |          |
| <b>Hypertension</b>                 |                   |                   |                   | 0.0721   |
| No                                  | 2020 (81.88)      | 539 (80.69)       | 1191 (78.93)      |          |
| Yes                                 | 447 (18.12)       | 129 (19.31)       | 318 (21.07)       |          |
| <b>Diabetes</b>                     |                   |                   |                   | < 0.0001 |
| No                                  | 2296 (93.07)      | 617 (92.37)       | 1334 (88.40)      |          |
| Yes                                 | 171 (6.93)        | 51 (7.63)         | 175 (11.60)       |          |
| <b>Hyperlipidemia</b>               |                   |                   |                   | 0.8288   |
| No                                  | 2342 (94.93)      | 633 (94.76)       | 1468 (95.29)      |          |
| Yes                                 | 125 (5.07)        | 35 (5.24)         | 71 (4.71)         |          |
| <b>Coronary artery disease</b>      |                   |                   |                   | 0.6442   |
| No                                  | 2379 (96.43)      | 648 (97.01)       | 1462 (96.89)      |          |
| Yes                                 | 88 (3.57)         | 20 (2.99)         | 47 (3.11)         |          |

P-value was calculated based on the two sample t test and Pearson's chi-square test.

**Supplement Table 2.** Baseline characteristics and comorbid medical disorders for the control cohort and patients with varicose vein (VV).

| Characteristic                 | Varicose vein Grade1 | Varicose vein Grade1 control | Standardized difference | Varicose vein Grade2 | Varicose vein Grade2 control | Standardized difference | Varicose vein Grade3 | Varicose vein Grade3 control | Standardized difference |
|--------------------------------|----------------------|------------------------------|-------------------------|----------------------|------------------------------|-------------------------|----------------------|------------------------------|-------------------------|
| <b>n (%)</b>                   | <b>n = 2467</b>      | <b>n = 9497</b>              |                         | <b>n = 668</b>       | <b>n = 2541</b>              |                         | <b>n = 1509</b>      | <b>n = 5722</b>              |                         |
| <b>Age (years)</b>             |                      |                              | 0.02882                 |                      |                              | 0.01557                 |                      |                              | 0.01539                 |
| ≥ 65                           | 1756 (71.18)         | 6870 (72.48)                 |                         | 428 (64.07)          | 1647 (64.82)                 |                         | 529 (35.06)          | 1964 (34.32)                 |                         |
| < 65                           | 711 (28.82)          | 2609 (27.52)                 |                         | 240 (35.93)          | 894 (35.18)                  |                         | 980 (64.94)          | 3758 (65.68)                 |                         |
| <b>Age (mean±SD)</b>           | 55.57 ± 14.76        | 55.14 ± 14.69                | 0.02891                 | 57.20 ± 17.45        | 56.91 ± 17.52                | 0.01664                 | 56.50 ± 17.31        | 56.09 ± 17.38                | 0.02336                 |
| <b>Gender</b>                  |                      |                              | 0.00891                 |                      |                              | 0.01014                 |                      |                              | 0.00726                 |
| Male                           | 773 (31.33)          | 2931 (30.92)                 |                         | 277 (41.47)          | 1041 (40.97)                 |                         | 746 (49.44)          | 2808 (49.07)                 |                         |
| Female                         | 1694 (68.67)         | 6548 (69.08)                 |                         | 391 (58.53)          | 1500 (59.03)                 |                         | 763 (50.56)          | 2914 (50.93)                 |                         |
| <b>Hypertension</b>            |                      |                              | 0.03885                 |                      |                              | 0.04022                 |                      |                              | 0.05681                 |
| No                             | 2020 (81.88)         | 7901 (83.35)                 |                         | 539 (80.69)          | 2090 (82.25)                 |                         | 1191 (78.93)         | 4646 (81.20)                 |                         |
| Yes                            | 447 (18.12)          | 1578 (16.65)                 |                         | 129 (19.31)          | 451 (17.75)                  |                         | 318 (21.07)          | 1076 (18.80)                 |                         |
| <b>Diabetes</b>                |                      |                              | 0.04942                 |                      |                              | 0.06897                 |                      |                              | 0.06569                 |
| No                             | 2296 (93.07)         | 8936 (94.27)                 |                         | 617 (92.37)          | 2391 (94.10)                 |                         | 1334 (88.40)         | 5174 (90.42)                 |                         |
| Yes                            | 171 (6.93)           | 543 (5.73)                   |                         | 51 (7.63)            | 150 (5.90)                   |                         | 175 (11.60)          | 548 (9.58)                   |                         |
| <b>Hyperlipidemia</b>          |                      |                              | 0.08073                 |                      |                              | 0.09142                 |                      |                              | 0.08733                 |
| No                             | 2342 (94.93)         | 9153 (96.56)                 |                         | 633 (94.76)          | 2455 (96.62)                 |                         | 1468 (95.29)         | 5549 (96.98)                 |                         |
| Yes                            | 125 (5.07)           | 326 (3.44)                   |                         | 35 (5.24)            | 86 (3.38)                    |                         | 71 (4.71)            | 173 (3.02)                   |                         |
| <b>Coronary artery disease</b> |                      |                              | 0.07654                 |                      |                              | 0.07737                 |                      |                              | 0.08244                 |
| No                             | 2379 (96.43)         | 9263 (97.72)                 |                         | 648 (97.01)          | 2495 (98.19)                 |                         | 1462 (96.89)         | 5617 (98.16)                 |                         |
| Yes                            | 88 (3.57)            | 216 (2.28)                   |                         | 20 (2.99)            | 46 (1.81)                    |                         | 47 (3.11)            | 105 (1.84)                   |                         |

**Supplement Table 3.** ICD-9 codes versus chart review diagnosis among outpatients with VV

| Code                                                        | No.  | Clinical diagnosis | No.  |
|-------------------------------------------------------------|------|--------------------|------|
| <b>454.9 Asymptomatic varicose veins</b>                    | 1188 | VV                 | 1188 |
|                                                             |      | Others             | 0    |
| <b>454.1 With inflammation</b>                              | 775  | VV                 | 775  |
|                                                             |      | Others             | 0    |
| <b>454.0 Varicose veins of lower extremities With ulcer</b> | 152  | VV                 | 152  |
|                                                             |      | Others             | 0    |
| <b>454.2 With ulcer and inflammation</b>                    | 87   | VV                 | 87   |
|                                                             |      | Others             | 0    |

**Supplement Table 4.** ICD-9 codes-derived severity grading versus Clinical–  
Etiological–Anatomical–Pathophysiological (CEAP) stages of inpatients with VV

| Code                                                        | No. | CEAP stage | No. |
|-------------------------------------------------------------|-----|------------|-----|
| <b>454.9 Asymptomatic varicose veins</b>                    | 193 | C0-2       | 183 |
|                                                             |     | C3-4       | 6   |
|                                                             |     | C5-6       | 4   |
| <b>454.1 With inflammation</b>                              | 56  | C0-2       | 0   |
|                                                             |     | C3-4       | 56  |
|                                                             |     | C5-6       | 0   |
| <b>454.0 Varicose veins of lower extremities With ulcer</b> | 86  | C0-2       | 6   |
|                                                             |     | C3-4       | 0   |
|                                                             |     | C5-6       | 80  |
| <b>454.2 With ulcer and inflammation</b>                    | 12  |            |     |

|        | CEAP 0-2       | Not CEAP       |                |
|--------|----------------|----------------|----------------|
| Test + | 183            | 10             | 183/193 (94.8) |
| Test - | 6              | 136            | 136/142 (95.7) |
|        | 183/189 (96.8) | 136/146 (93.1) |                |

| Statistic                        | Estimate | 95% CI           |
|----------------------------------|----------|------------------|
| <b>Sensitivity</b>               | 96.83%   | 93.22% to 98.83% |
| <b>Specificity</b>               | 93.15 %  | 87.76% to 96.67% |
| <b>Positive Predictive Value</b> | 94.82%   | 90.95% to 97.08% |
| <b>Negative Predictive Value</b> | 95.77 %  | 91.15% to 98.03% |

|        | CEAP 3-4     | Not CEAP      |                |
|--------|--------------|---------------|----------------|
| Test + | 56           | 0             | 56/56 (100)    |
| Test - | 6            | 273           | 273/279 (97.8) |
|        | 56/62 (90.3) | 273/273 (100) |                |

| Statistic                        | Estimate | 95% CI            |
|----------------------------------|----------|-------------------|
| <b>Sensitivity</b>               | 90.32%   | 80.12% to 96.37%  |
| <b>Specificity</b>               | 100.00 % | 98.66% to 100.00% |
| <b>Positive Predictive Value</b> | 100.00%  |                   |
| <b>Negative Predictive Value</b> | 97.85 %  | 95.51% to 98.98%  |

|        |              |                |                |
|--------|--------------|----------------|----------------|
|        | CEAP 5-6     | Not CEAP       |                |
| Test + | 80           | 6              | 80/86 (93)     |
| Test - | 4            | 245            | 245/249 (98.4) |
|        | 80/84 (95.2) | 245/251 (97.6) |                |

| <b>Statistic</b>                 | <b>Estimate</b> | <b>95% CI</b>    |
|----------------------------------|-----------------|------------------|
| <b>Sensitivity</b>               | 95.24%          | 88.25% to 98.69% |
| <b>Specificity</b>               | 97.61 %         | 94.87% to 99.12% |
| <b>Positive Predictive Value</b> | 93.02%          | 85.79% to 96.71% |
| <b>Negative Predictive Value</b> | 98.39 %         | 95.92% to 99.38% |



**Supplement Table 5.** Sensitivity analysis of hazard ratio in patients with VV compared with the matched control cohort

|                                                                          | VV                              | Control    |
|--------------------------------------------------------------------------|---------------------------------|------------|
| <b>History of pregnancy (ICD-9-CM : V22, V23.2, 761.5), N(%)</b>         | 169 (3.64)                      | 598 (3.37) |
| <b>Adjusted HR (95% CI); p-value<sup>2</sup></b>                         |                                 |            |
| all-cause mortality as endpoint                                          | 1.369 (1.191, 1.573); < 0.0001  | Reference  |
| MACE as endpoint                                                         | 2.055 (1.893, 2.231); < 0.0001  | Reference  |
| <b>For Grade 3 and matched controls</b>                                  |                                 |            |
| all-cause mortality as endpoint                                          | 1.838 (1.485, 2.276); < 0.0001  | Reference  |
| MACE as endpoint                                                         | 2.456 (2.138, 2.821); < 0.0001  | Reference  |
| <b>Myocardial infarction, stroke, coronary angioplasty or CABG, N(%)</b> | 19 (0.41)                       | 457 (2.58) |
| <b>Adjusted HR (95% CI); p-value<sup>3</sup></b>                         |                                 |            |
| all-cause mortality as endpoint                                          | 1.360 (1.181, 1.567); < 0.0001  | Reference  |
| MACE as endpoint                                                         | 1.952 (1.799, 2.119); < 0.0001  | Reference  |
| <b>For Grade 3 and matched controls</b>                                  |                                 |            |
| all-cause mortality as endpoint                                          | 1.842 (1.487, 2.283) ; < 0.0001 | Reference  |
| MACE as endpoint                                                         | 2.316 (2.018, 2.658); < 0.0001  | Reference  |

HR = Hazard Ratio; CI = Confidence Interval

2 Adjusted for history of pregnancy, age, gender, hypertension, diabetes, hyperlipidemia, coronary artery disease, chronic obstructive pulmonary disease, cancer, atrial fibrillation, heart failure, ischemic heart disease, chronic renal insufficiency

3 HR is calculated for population without history of Myocardial infarction, stroke, coronary angioplasty or CABG and the value is adjusted for age, gender, hypertension, diabetes, hyperlipidemia, coronary artery disease, chronic obstructive pulmonary disease, cancer, atrial fibrillation, heart failure, ischemic heart disease, chronic renal insufficiency

STROBE Statement—Checklist of items that should be included in reports of *cohort studies*

|                              | Item No | Recommendation                                                                                                                                                                                    | Page No |
|------------------------------|---------|---------------------------------------------------------------------------------------------------------------------------------------------------------------------------------------------------|---------|
| <b>Title and abstract</b>    | 1       | (a) Indicate the study's design with a commonly used term in the title or the abstract                                                                                                            | 1       |
|                              |         | (b) Provide in the abstract an informative and balanced summary of what was done and what was found                                                                                               | 3       |
| <b>Introduction</b>          |         |                                                                                                                                                                                                   |         |
| Background/rationale         | 2       | Explain the scientific background and rationale for the investigation being reported                                                                                                              | 5       |
| Objectives                   | 3       | State specific objectives, including any prespecified hypotheses                                                                                                                                  | 5       |
| <b>Methods</b>               |         |                                                                                                                                                                                                   |         |
| Study design                 | 4       | Present key elements of study design early in the paper                                                                                                                                           | 6       |
| Setting                      | 5       | Describe the setting, locations, and relevant dates, including periods of recruitment, exposure, follow-up, and data collection                                                                   | 6       |
| Participants                 | 6       | (a) Give the eligibility criteria, and the sources and methods of selection of participants. Describe methods of follow-up                                                                        | 6       |
|                              |         | (b) For matched studies, give matching criteria and number of exposed and unexposed                                                                                                               | 6       |
| Variables                    | 7       | Clearly define all outcomes, exposures, predictors, potential confounders, and effect modifiers. Give diagnostic criteria, if applicable                                                          | 6       |
| Data sources/<br>measurement | 8*      | For each variable of interest, give sources of data and details of methods of assessment (measurement). Describe comparability of assessment methods if there is more than one group              | 6       |
| Bias                         | 9       | Describe any efforts to address potential sources of bias                                                                                                                                         | 6       |
| Study size                   | 10      | Explain how the study size was arrived at                                                                                                                                                         | 7       |
| Quantitative variables       | 11      | Explain how quantitative variables were handled in the analyses. If applicable, describe which groupings were chosen and why                                                                      | 7       |
| Statistical methods          | 12      | (a) Describe all statistical methods, including those used to control for confounding                                                                                                             | 8       |
|                              |         | (b) Describe any methods used to examine subgroups and interactions                                                                                                                               | 9       |
|                              |         | (c) Explain how missing data were addressed                                                                                                                                                       | 9       |
|                              |         | (d) If applicable, explain how loss to follow-up was addressed                                                                                                                                    | 9       |
|                              |         | (e) Describe any sensitivity analyses                                                                                                                                                             | 9       |
| <b>Results</b>               |         |                                                                                                                                                                                                   |         |
| Participants                 | 13*     | (a) Report numbers of individuals at each stage of study—eg numbers potentially eligible, examined for eligibility, confirmed eligible, included in the study, completing follow-up, and analysed | 10      |
|                              |         | (b) Give reasons for non-participation at each stage                                                                                                                                              | 10      |
|                              |         | (c) Consider use of a flow diagram                                                                                                                                                                | 10      |
| Descriptive data             | 14*     | (a) Give characteristics of study participants (eg demographic, clinical, social) and information on exposures and potential confounders                                                          | 10      |
|                              |         | (b) Indicate number of participants with missing data for each variable of interest                                                                                                               | 10      |
|                              |         | (c) Summarise follow-up time (eg, average and total amount)                                                                                                                                       | 10      |
| Outcome data                 | 15*     | Report numbers of outcome events or summary measures over time                                                                                                                                    | 10      |

|    |                          |    |                                                                                                                                                                                                              |    |
|----|--------------------------|----|--------------------------------------------------------------------------------------------------------------------------------------------------------------------------------------------------------------|----|
| 1  | Main results             | 16 | (a) Give unadjusted estimates and, if applicable, confounder-adjusted estimates and their precision (eg, 95% confidence interval). Make clear which confounders were adjusted for and why they were included | 11 |
| 2  |                          |    | (b) Report category boundaries when continuous variables were categorized                                                                                                                                    | 11 |
| 3  |                          |    | (c) If relevant, consider translating estimates of relative risk into absolute risk for a meaningful time period                                                                                             | 11 |
| 4  |                          |    |                                                                                                                                                                                                              |    |
| 5  | Other analyses           | 17 | Report other analyses done—eg analyses of subgroups and interactions, and sensitivity analyses                                                                                                               | 11 |
| 6  |                          |    |                                                                                                                                                                                                              |    |
| 7  |                          |    |                                                                                                                                                                                                              |    |
| 8  |                          |    |                                                                                                                                                                                                              |    |
| 9  |                          |    |                                                                                                                                                                                                              |    |
| 10 |                          |    |                                                                                                                                                                                                              |    |
| 11 | <b>Discussion</b>        |    |                                                                                                                                                                                                              |    |
| 12 | Key results              | 18 | Summarise key results with reference to study objectives                                                                                                                                                     | 12 |
| 13 | Limitations              | 19 | Discuss limitations of the study, taking into account sources of potential bias or imprecision. Discuss both direction and magnitude of any potential bias                                                   | 12 |
| 14 |                          |    |                                                                                                                                                                                                              |    |
| 15 | Interpretation           | 20 | Give a cautious overall interpretation of results considering objectives, limitations, multiplicity of analyses, results from similar studies, and other relevant evidence                                   | 13 |
| 16 |                          |    |                                                                                                                                                                                                              |    |
| 17 | Generalisability         | 21 | Discuss the generalisability (external validity) of the study results                                                                                                                                        | 14 |
| 18 |                          |    |                                                                                                                                                                                                              |    |
| 19 |                          |    |                                                                                                                                                                                                              |    |
| 20 |                          |    |                                                                                                                                                                                                              |    |
| 21 | <b>Other information</b> |    |                                                                                                                                                                                                              |    |
| 22 | Funding                  | 22 | Give the source of funding and the role of the funders for the present study and, if applicable, for the original study on which the present article is based                                                | 15 |
| 23 |                          |    |                                                                                                                                                                                                              |    |
| 24 |                          |    |                                                                                                                                                                                                              |    |

25  
26 \*Give information separately for exposed and unexposed groups.

27  
28 **Note:** An Explanation and Elaboration article discusses each checklist item and gives methodological background and  
29 published examples of transparent reporting. The STROBE checklist is best used in conjunction with this article (freely  
30 available on the Web sites of PLoS Medicine at <http://www.plosmedicine.org/>, Annals of Internal Medicine at  
31 <http://www.annals.org/>, and Epidemiology at <http://www.epidem.com/>). Information on the STROBE Initiative is  
32 available at <http://www.strobe-statement.org>.  
33  
34  
35  
36  
37  
38  
39  
40  
41  
42  
43  
44  
45  
46  
47  
48  
49  
50  
51  
52  
53  
54  
55  
56  
57  
58  
59  
60

# BMJ Open

## Severe varicose veins and the risk of mortality: A nationwide population-based cohort study

|                                 |                                                                                                                                                                                                                                                                                                                                                                                                                                                                                                                                                                                                                                                                                                                                                                                                                                                                   |
|---------------------------------|-------------------------------------------------------------------------------------------------------------------------------------------------------------------------------------------------------------------------------------------------------------------------------------------------------------------------------------------------------------------------------------------------------------------------------------------------------------------------------------------------------------------------------------------------------------------------------------------------------------------------------------------------------------------------------------------------------------------------------------------------------------------------------------------------------------------------------------------------------------------|
| Journal:                        | <i>BMJ Open</i>                                                                                                                                                                                                                                                                                                                                                                                                                                                                                                                                                                                                                                                                                                                                                                                                                                                   |
| Manuscript ID                   | bmjopen-2019-034245.R2                                                                                                                                                                                                                                                                                                                                                                                                                                                                                                                                                                                                                                                                                                                                                                                                                                            |
| Article Type:                   | Original research                                                                                                                                                                                                                                                                                                                                                                                                                                                                                                                                                                                                                                                                                                                                                                                                                                                 |
| Date Submitted by the Author:   | 28-Feb-2020                                                                                                                                                                                                                                                                                                                                                                                                                                                                                                                                                                                                                                                                                                                                                                                                                                                       |
| Complete List of Authors:       | Wu, Nan-Chun ; Chi Mei Medical Center, Department of Cardiovascular Surgery; Chia Nan University of Pharmacy and Science, Department of Hospital and Health Care Administration, Biotechnology<br>Chen, Zhih-Cherng ; Chi Mei Medical Center, Department of Cardiology; Chia Nan University of Pharmacy and Science, Department of Pharmacy<br>Feng, I-Jung ; Chi Mei Medical Center, Department of Healthcare Administration and Medical Informatics<br>Ho, Chung-Han; Chi Mei Medical Center, Medical Research<br>Chiang, Chun-Yen ; Chi Mei Medical Center, Division of Cardiology, Department of Internal Medicine; Chia Nan University of Pharmacy and Science, Department of Pharmacology<br>Wang, Jhi-Joung ; Chi Mei Medical Center, Medical Research<br>Chang, Wei-Ting; Chi Mei Medical Center, Division of Cardiology, Department of Internal Medicine |
| <b>Primary Subject Heading</b>: | Cardiovascular medicine                                                                                                                                                                                                                                                                                                                                                                                                                                                                                                                                                                                                                                                                                                                                                                                                                                           |
| Secondary Subject Heading:      | Cardiovascular medicine                                                                                                                                                                                                                                                                                                                                                                                                                                                                                                                                                                                                                                                                                                                                                                                                                                           |
| Keywords:                       | varicose vein, mortality, sex, age, cardiovascular risk                                                                                                                                                                                                                                                                                                                                                                                                                                                                                                                                                                                                                                                                                                                                                                                                           |
|                                 |                                                                                                                                                                                                                                                                                                                                                                                                                                                                                                                                                                                                                                                                                                                                                                                                                                                                   |

SCHOLARONE™  
Manuscripts



I, the Submitting Author has the right to grant and does grant on behalf of all authors of the Work (as defined in the below author licence), an exclusive licence and/or a non-exclusive licence for contributions from authors who are: i) UK Crown employees; ii) where BMJ has agreed a CC-BY licence shall apply, and/or iii) in accordance with the terms applicable for US Federal Government officers or employees acting as part of their official duties; on a worldwide, perpetual, irrevocable, royalty-free basis to BMJ Publishing Group Ltd ("BMJ") its licensees and where the relevant Journal is co-owned by BMJ to the co-owners of the Journal, to publish the Work in this journal and any other BMJ products and to exploit all rights, as set out in our [licence](#).

The Submitting Author accepts and understands that any supply made under these terms is made by BMJ to the Submitting Author unless you are acting as an employee on behalf of your employer or a postgraduate student of an affiliated institution which is paying any applicable article publishing charge ("APC") for Open Access articles. Where the Submitting Author wishes to make the Work available on an Open Access basis (and intends to pay the relevant APC), the terms of reuse of such Open Access shall be governed by a Creative Commons licence – details of these licences and which [Creative Commons](#) licence will apply to this Work are set out in our licence referred to above.

Other than as permitted in any relevant BMJ Author's Self Archiving Policies, I confirm this Work has not been accepted for publication elsewhere, is not being considered for publication elsewhere and does not duplicate material already published. I confirm all authors consent to publication of this Work and authorise the granting of this licence.

1  
2  
3  
4 **Severe varicose veins and the risk of mortality: A nationwide population-based cohort**  
5  
6 **study**  
7

8 Nan-Chun Wu<sup>a,b\*</sup>; Zhih-Cherng Chen<sup>c,d\*</sup>; I-Jung Feng<sup>e</sup>; Chung-Han Ho<sup>e</sup>; Chun-Yen Chiang<sup>c,d</sup>;  
9  
10 Jhi-Joung Wang<sup>f</sup>; Wei-Ting Chang<sup>c,g,h</sup>  
11  
12

13 **Short title:** Outcomes of Varicose Veins  
14

15 <sup>a</sup> Department of Cardiovascular Surgery, Chi Mei Medical Center, Tainan, Taiwan  
16

17  
18 <sup>b</sup> Department of Hospital and Health Care Administration, Biotechnology, Chia-Nan University  
19  
20 of Pharmacy and Science, Tainan, Taiwan  
21

22 <sup>c</sup> Department of Cardiology, Chi Mei Medical Center, Tainan, Taiwan  
23

24 <sup>d</sup> Department of Pharmacy, Chia Nan University of Pharmacy and Science, Tainan City, Taiwan  
25

26  
27 <sup>e</sup> Department of Healthcare Administration and Medical Informatics, Chi Mei Medical Center,  
28  
29 Tainan, Taiwan  
30

31 <sup>f</sup> Department of Medical Research, Chi Mei Medical Center, Tainan, Taiwan  
32

33  
34 <sup>g</sup> Department of Biotechnology, Southern Taiwan University of Science and Technology, Tainan  
35  
36 710, Taiwan  
37

38  
39 <sup>h</sup> Institute of Clinical Medicine, College of Medicine, National Cheng Kung University, Tainan  
40  
41 70101, Taiwan  
42

43 \* Nan-Chun Wu and Zhih-Cherng Chen contributed to this article equally  
44

45 **Address for correspondence:** Wei-Ting Chang, MD,  
46

47  
48 901, Zhonghua Road, Yongkang District, Tainan, Taiwan (R.O.C.)  
49

50 Tel: +886-281-2811; Fax: +886-281-2811; E-mail: [cmevecho2@gmail.com](mailto:cmevecho2@gmail.com)  
51

52 **Word count of the Abstract:** 238 words  
53

54 **Word count of the text:** 2936 words  
55

## Abstract

**Objective:** Varicose veins (VV) are common and although considered benign may cause morbidity. However, the association between VV severity and cardiovascular and mortality risks remains unknown. The aim of this study was to investigate the factors associated with overall mortality in patients with VV.

**Methods:** A total of 4644 patients with newly diagnosed VV between 1999 and 2013 were identified from Taiwan's National Health Insurance Database. VV severity was classified from grade 1 to 3 according to the presentation of ulcers or inflammation. Moreover, 9497, 2541 and 5722 age-, sex-, and chronic cardiovascular risk factor-matched controls, as assessed based on propensity score, were separately selected for 3 grading VV groups. Enrolled patients were analyzed using conditional Cox proportional hazards regression analysis to estimate risk of mortality and major cardiovascular adverse events (MACE) in the VV and control groups.

**Results:** Most patients with VV were free from systemic disease. However, compared with matched controls, patients with VV showed a 1.37-times increased risk of mortality (95% CI 1.19–1.57;  $p < 0.0001$ ). Compared with matched controls, older (age  $\geq 65$  years) (adjusted HR: 1.38; 95% CI: 1.17–1.62;  $p = 0.0001$ ) and male patients with VV (adjusted HR: 1.41; 95% CI: 1.18–1.68;  $p = 0.0001$ ) showed increased risk of mortality. Furthermore, compared with controls, patients with VV showed 2.05-times greater risk of MACE. Compared with matched controls, population at grade 3 increased 1.83 times risk of mortality and 2.04 to 38.42 times risk of heart failure, acute coronary syndrome, ischemic stroke and venous thromboembolism.

**Conclusions:** This nationwide cohort study demonstrated that patients with VV are at a risk of cardiovascular events and mortality. Our findings suggest that presence of VV warrants close

1  
2  
3  
4 attention in terms of prognosis and treatment.  
5

6 **Key words:** varicose vein, mortality, sex, age, cardiovascular risk  
7  
8  
9

### 10 **Strengths and limitations of this study**

- 11 1. The strengths of this study are its population-based design with a large sample size including  
12 study and control cohorts.  
13
- 14 2. All insurance claims were reviewed by medical reimbursement specialists.  
15
- 16 3. However, some risk factors of varicose vein including smoking habits, lack of movement,  
17 overweight and glycated hemoglobin levels were not available in this database.  
18
- 19 4. Our novel findings indicated that patients at severe grades of varicose vein had higher risks  
20 of mortality and major adverse cardiovascular events.  
21
- 22 5. The presence of varicose vein should catch more awareness of potential co-existing risks of  
23 mortality and cardiovascular events.  
24  
25  
26  
27  
28  
29  
30  
31  
32  
33  
34  
35  
36  
37  
38  
39  
40  
41  
42  
43  
44  
45  
46  
47  
48  
49  
50  
51  
52  
53  
54  
55



## Introduction

Varicose veins (VV) can be considered a common disease with prevalence ranging from 2% to 56% in the adult population.<sup>1</sup> Following clinical examination, VV diagnosis is primarily based on the presence of enlarged and twisted veins in the lower extremities.<sup>1,2</sup> Among people with VV, 1% to 4% of individuals show higher severity grades (Clinical–Etiological–Anatomical–Pathophysiological [CEAP] classification, 5–6).<sup>1,2</sup> Although VV lead to leg swelling, venous eczema, and ulceration in some cases, they are regarded as a benign disease.<sup>3,4</sup> Moreover, the association between the severity of VV and risk of future adverse events remains unknown. In fact, the majority of the previous studies have focused on the importance of superficial venous thrombosis or deep vein thrombosis (DVT).<sup>5</sup> In a 30-year cohort study, mortality risk among patients with DVT and pulmonary embolism (PE) was markedly higher than that in age and sex-matched patients, particularly within the first 30 days.<sup>6</sup> Similarly, another population-based case-control study demonstrated that having VV was a risk factor for venous thromboembolism, although the association of VV severity with survival and cardiovascular events remains unknown.<sup>7</sup> In addition, although age, family history, and female sex are the known risk factors for VV, the effects of underlying diseases or sex on outcomes of VV remain unclear.<sup>1</sup> We hypothesized that presence of VV can be used as a marker for cardiovascular risk. Therefore, the aim of this study was to investigate the association of VV with survival and cardiovascular outcomes.

## Methods

### *Data Source*

Taiwan launched a single-payer National Health Insurance (NHI) program on March 1, 1995. This database contains details of almost every Taiwanese resident (coverage rate >98% in 2009), making it one of the world's largest and most complete population-based sources. The data used in this study were retrieved from the Longitudinal Health Insurance Database 2000 (LHID2000)—a subset of the NHI database containing all claims data from 1996 to 2013, covering 1 million beneficiaries randomly selected in 2000. At that time, there were no significant differences in age, sex, and health care costs between patients with VV and matched controls. LHID2000 provided encrypted patient identification numbers; sex; date of birth; admission and discharge dates; International Classification of Diseases, Ninth Revision, Clinical Modification (ICD-9-CM) codes of diagnoses and procedures; prescription details; registry data in the Catastrophic Illness Patient Database; and costs covered and paid for by NHI. Details of the National Health Insurance Research Databases (NHIRD) are described in previous studies.<sup>8,9</sup> Moreover, the accuracy of major disease diagnoses in the NHIRD, including stroke and acute coronary syndrome, has been validated.<sup>9</sup> The present study was ethically approved by the Institutional Review Board of Chi-Mei Hospital (CV code: 10406-E01). All procedures followed the principles outlined in the Declaration of Helsinki.

### *Patient and Public Involvement*

No patient involved.

### *Study Design*

This nationwide population-based, retrospective cohort study was conducted to investigate the association between VV and subsequent mortality. Patients with at least 3 claims for outpatient VV diagnosis in 1 year or with 1 claim for inpatient VV diagnosis (ICD-9-CM codes

1  
2  
3  
4 454, 454.0, 454.1, 454.2, 454.8, and 454.9) were considered as VV cases. Patients with a first-  
5  
6 time diagnosis of VV from January 1999 to December 2012 were included in the cohort. Codes  
7  
8 for VV were considered reliable for diagnosis based on clinical symptoms. The date of the first-  
9  
10 time VV diagnosis was considered the index date in this study. To ensure accurate VV diagnosis,  
11  
12 and to avoid potentially confounding effects, patients with DVT (ICD-9-CM codes 453.40,  
13  
14 459.1, 671.4, 671.3, 451.83, 459.3, 453.4, and 451.11) or PE (ICD-9-CM codes 415.1, 415.11,  
15  
16 673, 673.2, and 673.8) in an ambulatory setting before the index date were excluded. In addition,  
17  
18 VV severity was categorized as grade 1 uncomplicated (ICD-9-CM code 454.9), grade 2 with  
19  
20 ulcer (ICD-9-CM code 454.0) or inflammation (ICD-9-CM code 454.1), and grade 3 with both  
21  
22 ulcer and inflammation (ICD-9-CM code 454.2).  
23  
24  
25  
26

27  
28 Three control cohorts (n1=9497, n2=2541 and n3=5722; 4 control subjects for every  
29  
30 enrolled patient with VV), not diagnosed with VV from 1996 to 2013, were selected for three  
31  
32 VV grade groups separately. To eliminate potential selection bias, the controls were matched  
33  
34 using propensity score method at a 4:1 ratio for baseline characteristics of age, sex, and chronic  
35  
36 cardiovascular risk factors, including hypertension (ICD-9-CM codes 401–405, A260, A269,  
37  
38 4372), diabetes (ICD-9-CM codes 250, A181, A189, A229, A239, 3572, and 3620),  
39  
40 hyperlipidemia (ICD-9-CM code 272), and coronary artery disease (CAD; ICD-9-CM codes  
41  
42 410–414). The propensity scores (PS) for identified VV cases and controls were estimated using  
43  
44 the fitting logistic regression model. Based on greedy algorithm matching, 8 control subjects (the  
45  
46 nearest neighbor matching of VV) were selected as matched controls.<sup>10</sup> If a case failed to be  
47  
48 assigned to the 4 matched controls, it was dropped from the set of matches. In addition, since the  
49  
50 primary VV treatment was covered by insurance, it prevented VV from over-diagnosis. The  
51  
52 matched controls were assigned the same index date as that of the corresponding VV patient.  
53  
54  
55  
56

## *Outcomes*

The primary outcome was mortality, and the secondary outcome was major cardiovascular adverse events (MACEs), including acute coronary syndrome (ACS, ICD-9-CM codes 410, 410.7, 411.1, 411.81, and 414.8), congestive heart failure (CHF, ICD-9-CM codes 428, 428.0, 428.1, 428.2, and 428.9), ischemic stroke (ICD-9-CM code 436), DVT, and PE. Mortality was identified using the “in-hospital death” or “discharge under critical condition” codes at discharge. Enrollment in the NHI program is mandatory for all people in Taiwan, and registration must be withdrawn within 30 days after death. Patients with the abovementioned mortality-related codes and those withdrawn from the NHI program within 30 days after discharge from the last hospitalization were presumed to have died. All subjects were followed up from the index date to death (lost to follow-up) or until December 31, 2013, whichever was earlier.

## *Validation of the Accuracy of VV Diagnosis and CEAP Grading*

To validate the accuracy of the VV diagnosis, we reviewed the charts of all patients (inpatients and outpatients) using ICD-9-CM diagnosis codes for VV who visited Chi-Mei Medical Center (Tainan, Taiwan) from 2010 to 2015. Our aim was to determine the accuracy and consistency of code usage. A vascular specialist reviewed patient discharge and clinical records. In addition to examining the accuracy of VV diagnosis, the reviewer compared CEAP stages with our ICD-9-CM–derived grades in inpatients. Subsequently, we further investigated the sensitivity, specificity, and predictive value of the ICD codes for clinical diagnosis, as well as the applicability of our VV grading system. In particular, as ICD-9-CM coding and VV descriptions are associated with insurance payment, the accuracy of VV diagnosis and the reliability of VV

1  
2  
3  
4 severity grading increased. The consistency between CEAP and grading stages were evaluated  
5  
6 by kappa score, whose value between 0.8 and 1.0 was considered as an almost perfect  
7  
8 agreement.  
9

### 10 11 *Statistical Analyses*

12  
13  
14 Continuous and categorical baseline characteristics between the case and control groups  
15  
16 were separately compared by standardized mean difference (SMD), an assessment approach for  
17  
18 evaluating the balance between variables after PS matching. SMD greater than 0.1 is considered  
19  
20 to denote a meaningful imbalance in variables.  
21

22  
23 Conditional Cox proportional hazards regression analysis was used to estimate the risk of  
24  
25 mortality and MACE in the VV and control groups. Adjusted hazard ratios (HRs) were estimated  
26  
27 by adjusting for chronic obstructive pulmonary disease (ICD-9-CM codes 490-496) , cancer  
28  
29 (ICD-9-CM codes 140-208), atrial fibrillation (ICD-9-CM codes 427.31), heart failure (ICD-9-  
30  
31 CM codes 428), ischemic heart disease (ICD-9-CM codes 410-414), chronic renal insufficiency  
32  
33 (ICD-9-CM codes 403, 404, 582, 585-588). Moreover, the investigation was extended to  
34  
35 stratified subgroup analysis. HRs between the VV and control groups were separately estimated  
36  
37 in subgroups of population aged <65 years or  $\geq 65$  years; males or females; and subgroups with  
38  
39 or without a diagnosis of hypertension, diabetes, hyperlipidemia, or CAD. The Kaplan-Meier  
40  
41 method was used to separately estimate the 3-, 6-, and 9-year survival rates in the control and  
42  
43 VV groups. Kaplan-Meier curves of mortality and MACE were plotted for controls and patients  
44  
45 with 3 grades of VV severity. Differences in survival curves between the control and VV groups  
46  
47 were examined using the log-rank test.  
48  
49  
50  
51

52  
53 With respect to mortality, CHF, ACS, ischemic stroke and DVT +PE endpoints, the risks  
54  
55

1  
2  
3  
4 for VV with 3 separate severity grades were further estimated by comparison against each  
5  
6 matched controls.  
7

8  
9 Finally, sensitivity analyses were conducted to determine the influence from subjects with  
10  
11 pregnancy history (ICD-9-CM codes V22, V23.2, 761.5), peripheral artery disease (PAD, ICD-  
12  
13 9-CM codes 440.0, 440.2, 440.3, 440.8, 440.9, 443, 444.0, 444.22, 444.8, 447.8, and 447.9)  
14  
15 medical history and patients treated with operations (ICD-9-CM procedure code 3859, 3889 and  
16  
17 NHIRD order code 69013, 69014, 69015, 69016, 69017, 69019, 69020, 69021) including  
18  
19 ligation and stripping procedures after VV diagnosis.  
20  
21

22 A two-tailed p value of  $<0.05$  was considered statistically significant. All analyses were  
23  
24 performed using the SAS software, version 9.4 (SAS Institute, Cary, NC) and Stata software  
25  
26 15.0 (StataCorp, College Station, TX.)  
27  
28

## 29 **Results**

### 30 *Characteristics of the Study Population*

31  
32 A total of 4644 patients with newly diagnosed VV were identified during January 1999 to  
33  
34 December 2012. Among them, 2467, 668 and 1509 VVs were separately classified into 1, 2 and  
35  
36 3 severity grade. For each VV group, age-, sex-, and chronic disease-matched patients without  
37  
38 VV were separately included for comparison. The covariates between VV and matched groups  
39  
40 are well balanced after propensity score matching. All patients were tracked from the index dates  
41  
42 until achieving the primary outcomes or the end of the study. The mean age of patients with VV  
43  
44 was  $55.70 \pm 16.03$  years, the majority of the patients were female (61.33%), and most of them  
45  
46 did not present with chronic diseases such as hypertension, diabetes, hyperlipidemia, and CAD  
47  
48 (Table 1). Significantly different distribution of age, sex and diabetes among three severity VV  
49  
50  
51  
52  
53  
54  
55

1  
2  
3  
4 groups were displayed (p-value < 0.05) (Supplementary Table 1). Interestingly, more female  
5  
6 patients (68.67%) were diagnosed with a lower severity (grade 1). Also, the baseline  
7  
8 characteristics and comorbid medical disorders for 3 grading VV groups and 3 separately  
9  
10 matched controls were listed in Supplement Table 2.  
11  
12  
13  
14  
15

### 16 *Long-Term Mortality Risk*

17  
18 Compared with matched controls, the outcomes of patients with VV were worse. The  
19  
20 estimated survival at 3, 6, and 9 years were 97.6%, 95.6%, and 93.5%, respectively, in patients  
21  
22 with VV compared with 98.5%, 97.1%, and 95.6%, respectively, in controls (Figure 1A). A log-  
23  
24 rank test revealed a significant difference in survival curves of patients with VV and controls (p  
25  
26 <0.0001). The survival curves of controls and patients with different severities of VV are  
27  
28 presented in Figure 1B. Lower survival rates over time were observed in patients with highest  
29  
30 VV severity (grades 3) but not in those with grade 1-2. Significant difference between survival  
31  
32 curves between VV grading 3 and corresponding controls were revealed by log rank test (p <  
33  
34 0.0001). However, no significant differences were found between survival curves of patients  
35  
36 with VV severity grades (1-2) and corresponding controls (grade 1: p = 0.3191; grade 2:  
37  
38 p=0.3599).  
39  
40  
41  
42  
43

44 Overall, HR of all-cause mortality adjusted for chronic obstructive pulmonary disease,  
45  
46 cancer, atrial fibrillation, heart failure, ischemic heart disease, chronic renal insufficiency in  
47  
48 patients with VV was 1.34 times higher (adjusted HR: 1.37; 95% CI: 1.19–1.57; p < 0.0001) than  
49  
50 that in controls (Table 2). Stratified analysis revealed 1.38- and 1.41-times increased risks of  
51  
52 mortality in older (age  $\geq$  65 years; adjusted HR: 1.38; 95% CI: 1.17–1.62; p = 0.0001) and male  
53  
54  
55

1  
2  
3  
4 patients with VV (adjusted HR: 1.41; 95% CI: 1.18–1.68;  $p = 0.0001$ ). Notably, despite no  
5  
6 significant effect of VV on the survival of patients with hypertension, hyperlipidemia or  
7  
8 coronary artery disease was observed, patients with both VV and diabetes presented 1.50 times  
9  
10 higher risk of mortality compared with those without VV (adjusted HR: 1.50; 95% CI: 1.05–  
11  
12 2.15;  $p = 0.0254$ ). Furthermore, VV at grade 3 show 1.83 (95% CI : 1.48, 2.27 ;  $p < 0.0001$ )  
13  
14 greater risk of mortality adjusted for chronic obstructive pulmonary disease, cancer, atrial  
15  
16 fibrillation, heart failure, ischemic heart disease, chronic renal insufficiency.  
17  
18  
19  
20  
21  
22  
23

### 24 *Long-Term MACE risk*

25  
26 MACE risk significantly increased in patients with VV (HR: 2.05; 95% CI: 1.89–2.23;  $p <$   
27  
28 0.0001), particularly in relatively younger (age,  $<65$  years; adjusted HR: 2.17; 95% CI: 1.92–  
29  
30 2.46;  $p < 0.0001$ ) or male (adjusted HR: 2.32; 95% CI: 2.06–2.62;  $p < 0.0001$ ) patients (Table 3).  
31  
32 In addition, patients with VV showing cardiovascular risk factors, including hypertension,  
33  
34 diabetes, hyperlipidemia, and CAD, were at a higher risk of MACE than were matched controls.  
35  
36 In patients with VV, 3-, 6-, and 9-year MACE-free rates were 91.17%, 84.99%, and  
37  
38 79.27%(Figure 2A). These rates dramatically declined further with disease severity (Figure 2B).  
39  
40 In terms of individual cardiovascular outcomes, patients with grade 3 VV were at a greater risk  
41  
42 of CHF (adjusted HR: 2.05; 95% CI: 1.71–2.46;  $p < 0.0001$ ), ACS (adjusted HR: 2.04; 95% CI:  
43  
44 1.58–2.63;  $p < 0.0001$ ), and ischemic stroke (adjusted HR: 2.06; 95% CI: 1.58–2.69;  $p < 0.0001$ )  
45  
46 than were controls (Table 4). In particular, with the highest VV severity there was an increasing  
47  
48 risk of venous thrombotic events, including DVT and PE (Grade 3: adjusted HR: 38.4; 95% CI,  
49  
50 16.4–90.1;  $p < 0.0001$ ) (Table 4).  
51  
52  
53  
54  
55



### *Validation of the Accuracy of VV Diagnosis and ICD-9-CM–Derived VV Grading*

During 2010–2015 a total of 2202 outpatients and 347 inpatients were reported to have VV in Chi-Mei Medical Center. Among the outpatients, 1188 were coded as uncomplicated VV (ICD-9-CM code 454.9), 775 were coded as VV with inflammation (ICD-9-CM code 454.1), 152 were coded as VV with ulcers (ICD-9-CM code 454.0), and 87 were coded as VV with ulcer and inflammation (ICD-9-CM code 454.2) (Supplement Table 3). Notably, none were coded incorrectly. Compared with CEAP stage, as determined based on chart reviews, only a few inpatients were incorrectly or unclearly diagnosed using ICD-9-CM–derived VV codes (Supplement Table 4). For example, among patients with higher VV grades (CEAP stage 5–6), the positive and negative predictive values with ICD-9-CM–derived codes were 93% and 98.4%, respectively. Specifically, the sensitivity and specificity of ICD-9-CM–derived grading were up to 95.2% and 97.6%, respectively. The calculated kappa score between CEAP stages and grading severity is 0.92 (95%CI = [0.88, 0.96]).

### *Sensitivity analyses*

VV and controls with pregnancy history were identified and exam the influence in sensitivity analysis (Supplement Table 5). After additionally adjustment for history of pregnancy, the results remain showing great impacts on mortality and MACE (adjusted HR for death (95%CI) = 1.37 (1.19, 1.57), p-value<0.0001; adjusted HR for MACE (95%CI) = 2.01 (1.89, 2.23), p-value<0.0001).

After excluding 472 subjects with Myocardial infarction, stroke, coronary angioplasty or

1  
2  
3  
4 CABG, remaining VV and corresponding controls were included for sensitivity analysis.  
5

6 Comparing with corresponding matched controls, those conservatively treated VV patients were  
7  
8 found 1.36 times risks of mortality (adjusted HR (95%CI) = 1.36 (1.18, 1.57), p-value<0.0001)  
9  
10 and 1.95 times risks of MACE (adjusted HR (95%CI) = 1.95 (1.80, 2.12), p-value<0.0001).  
11  
12  
13

## 14 15 16 **Discussion**

17  
18 The primary findings of this study were that (1) patients with VV were at increasing risks of  
19  
20 mortality and cardiovascular events, especially those with VV at grade 3 compared with matched  
21  
22 controls; (2) having VV had a significant impact on the survival of male patients. To the best of  
23  
24 our knowledge, this nationwide population-based study is the first to comprehensively describe  
25  
26 the association of VV with patients' cardiovascular outcomes.  
27  
28

29  
30 Although VV are common, their potential threat to health has not been well investigated  
31  
32 previously.<sup>1,2</sup> Valve dysfunction-mediated activation of leukocytes, release of enzymes, and  
33  
34 remodeling of the vascular wall lead to venous valve destruction and incompetence.<sup>11</sup> VV may  
35  
36 cause inflammation, edema, ulcers,<sup>11</sup> endothelial dysfunction,<sup>12</sup> and subsequent DVT.<sup>5</sup> In  
37  
38 addition, overexpression of inducible nitric oxide synthase and transforming growth factor- $\beta$ 1  
39  
40 has been documented in patients with VV.<sup>13</sup> In this study, the risk of all-cause mortality and  
41  
42 MACE was higher in patients with VV than it was in matched controls, indicating that VV-  
43  
44 induced systemic inflammation may be associated with cardiovascular events regardless of the  
45  
46 development of venous thromboembolic events. Notably, the lower survival rates were observed  
47  
48 in patients with highest VV severity but not in those with grade 1-2. This also reflects that the  
49  
50 chronic inflammation induced by a higher grade of VV may be associated with increasing  
51  
52  
53  
54  
55

1  
2  
3  
4 mortality and MACEs. However, only a few studies have compared development of VV with  
5  
6 arterial disease and reported inconsistent findings.<sup>2,14</sup> A previous study in Finland has reported a  
7  
8 two-fold higher incidence of new arterial disease in individuals with VV than in those without it,  
9  
10 although the incidence of new hypertension was similar.<sup>14,15</sup> Thus, VV and arterial disease may  
11  
12 have a common etiology, but VV were not related to hypertension. Furthermore, Chang et al.  
13  
14 have reported the association of VV with the incidence of venous thromboembolism and  
15  
16 peripheral artery disease.<sup>16</sup> Reportedly, myocardial infarction and heart failure increase the risk  
17  
18 of thromboembolism.<sup>17</sup> In contrast, patients with thromboembolic events were at a higher risk of  
19  
20 subsequent myocardial infarction and stroke.<sup>18</sup> However, whether this association is causal or  
21  
22 represents common risk factors warrants further research. Notably, compared with controls,  
23  
24 patients with VV were at a higher risk of mortality independent of age and sex. Specifically, the  
25  
26 significant impact of VV was observed in male patients. In previous research, older age and  
27  
28 female sex were found to be the most relevant risk factors for VV.<sup>1</sup> VV incidence increases with  
29  
30 increasing age. However, Heit et al. have reported that younger patients with VV were at a  
31  
32 significantly increased risk of subsequent DVT, whereas the risk was attenuated with increasing  
33  
34 age.<sup>19</sup> Similarly, Lohr et al also reported that although female presented with a higher prevalence  
35  
36 of lower grade VV (CEAP 2-3) compared with male (50.5% v.s. 30.1%), there were more higher  
37  
38 grade VVs with trophic skin changes (CEAP 4-6) found in male than in female (5.4% v.s.  
39  
40 2.8%).<sup>20</sup> Also, DVT was more common in males compared with females (11.3% vs 7.8%).<sup>20</sup>  
41  
42 Earlier onset of VV in the younger population implies a higher risk of concomitant arterial  
43  
44 diseases or systemic inflammations. As described previously, female sex, pregnancy, and  
45  
46 predominately being in the sitting posture are risk factors for VV.<sup>21</sup> However, despite the valid  
47  
48 correlation between use of estrogen supplements and DVT, whether sex hormones contribute to  
49  
50  
51  
52  
53  
54  
55  
56

1  
2  
3  
4 the development of VV remains unclear.  
5  
6

7  
8 There were several strengths of this study. First, we included an unselected, large,  
9  
10 nationwide cohort of patients with VV. By including the data of 4644 patients over a 12-year  
11  
12 period, this study provided adequate statistical power for the analysis of long-term outcomes for  
13  
14 VV. Second, we compared the VV cohort with a matched, VV-free cohort, which helped  
15  
16 distinguish the characteristics of the VV population in terms of survival and outcomes. Third,  
17  
18 among patients with VV, the effects of sex on mortality and MACE were emphasized because  
19  
20 VV may have been ignored in these specific populations. Forth, we included patients presenting  
21  
22 with VV of various severity grades, which allowed for a comprehensive investigation of overall  
23  
24 effects of severity. Finally, a recently published article evaluated and supported the accuracy of  
25  
26 several major outcomes, including MI, hypertension, diabetes, stroke, CHF and VV, in  
27  
28 NHIRD.<sup>22</sup>  
29  
30  
31

32  
33 However, this study had several limitations. According to previous meta-analysis and  
34  
35 research, smoking habits, quality of life, lack of movement, pregnancy history, overweight and  
36  
37 glycated hemoglobin levels are considered VV risk factors, with some of these being related to  
38  
39 increased mortality risk. Although NHIRD provides a complete clinical medical history over  
40  
41 decades for 1 million people, currently the NHIRD lacks information regarding people's lifestyle  
42  
43 and clinical laboratory test results. Therefore, the selected confounders in this study were limited  
44  
45 to age, sex, and four chronic cardiovascular risk factors. The small corresponding area under the  
46  
47 receiver operating characteristic curve indicated that the relevant confounders were not  
48  
49 appropriately identified. To explore the effects of VV on mortality and MACE with minimum  
50  
51 confounding bias, a future study including more comprehensive VV-related risk factors is  
52  
53  
54  
55

imperative. Second, the miscoding of VV severity may have led to the exclusion of cases. This might explain why 47% of the included patients are with advanced venous disease (Grade 2 or 3), different from the general distribution of disease severity. Nevertheless, to overcome the inherent limitations, we verified the accuracy of VV diagnosis using chart review by a specialist. Overall, both the validation methods indicated a satisfactory accuracy of VV coding in the NHI database. Third, owing to difficulties in completing CEAP staging according to ICD-9, we established our own grading system. However, even though this novel ICD-9-CM–derived grading system clearly differentiated patients with various severities, it remained different from the generally applied CEAP staging system and disease progression could hardly be represented. Similarly, to validate the reliability of the ICD-9-CM–derived grading system, we reviewed medical records of inpatients with VV and observed satisfactory sensitivity and specificity. Forth, while ligation and stripping surgeries may affect the outcomes, through excluding patients receiving surgical treatment for VV we performed sensitivity test. It also revealed significant increases of risks of mortality and MACE in patients with VV compared with risks in the matched controls. Likewise, after excluding the potential influences of peripheral artery disease, we also found great impacts of mortality and MACE in the population with VV. Finally, increased mortality with higher ICD-9-CM–derived grades indicated that our grading system specifically reflected the severity of VV but the cause of mortality was not available in this database. .

## Conclusions

VV are a common condition typically believed to be benign; however, our results suggest

1  
2  
3  
4 that they warrant close attention. Compared with matched controls, patients with VV were at  
5  
6 increasing risks of mortality and cardiovascular events, especially those with VV at grade 3.

7  
8 Therefore, these findings should alert clinicians regarding the importance of detecting VV at an  
9  
10 early stage.  
11

## 12 **Author Contributions**

13  
14  
15  
16  
17 All authors contributed to the revision of the manuscript and approved the final version. All  
18  
19 agreed to be accountable. NC Wu contributed to concept and design, critical revision. ZC Chen  
20  
21 contributed to data collection and critical revision. IJ Feng contributed to critical revision, data  
22  
23 collection, statistical analysis and interpretation. CH Ho contributed to critical revision, data  
24  
25 collection, statistical analysis and interpretation. CY Chiang contributed to data collection and  
26  
27 critical revision. JJ Wang contributed to data collection and critical revision. WT Chang  
28  
29 contributed to concept and design, data collection, interpretation, manuscript writing and critical  
30  
31 revision.  
32  
33  
34  
35

36 **Disclosure:** None

37  
38  
39 **Funding:** We received the research grant supported by Chi-Mei Medical Center

40  
41  
42  
43 **Data availability:** All the data is available in National Health Insurance Research Database  
44  
45 (NHIRD) in Taiwan  
46  
47

## 48 **References**

- 49  
50  
51  
52 1. Beebe-Dimmer JL, Pfeifer JR, Engle JS, Schottenfeld D. The epidemiology of chronic  
53  
54 venous insufficiency and varicose veins. *Annals of epidemiology* 2005;15:175-84.  
55

- 1  
2  
3  
4 2. Cesarone MR, Belcaro G, Nicolaidis AN, Geroulakos G, Griffin M, Incandela L, et al.  
5  
6 'Real' epidemiology of varicose veins and chronic venous diseases: the San Valentino  
7  
8 Vascular Screening Project. *Angiology* 2002;53:119-30.  
9  
10
- 11  
12 3. Eberhardt RT, Raffetto JD. Chronic venous insufficiency. *Circulation*.2014;130:333-46.  
13  
14
- 15 4. Nicolaidis AN. Investigation of chronic venous insufficiency: A consensus statement  
16  
17 (France, March 5-9, 1997). *Circulation* 2000;102:E126-63.  
18  
19
- 20 5. Muller-Buhl U, Leutgeb R, Engeser P, Achankeng EN, Szecsenyi J, Laux G. Varicose  
21  
22 veins are a risk factor for deep venous thrombosis in general practice patients. *VASA*  
23  
24 2012;41:360-5.  
25  
26
- 27 6. Sogaard KK, Schmidt M, Pedersen L, Horvath-Puho E, Sorensen HT. 30-year mortality  
28  
29 after venous thromboembolism: a population-based cohort study. *Circulation*  
30  
31 2014;130:829-36.  
32  
33
- 34 7. Heit JA, Silverstein MD, Mohr DN, Petterson TM, O'Fallon WM, Melton LJ, 3rd. Risk  
35  
36 factors for deep vein thrombosis and pulmonary embolism: a population-based case-  
37  
38 control study. *Arch Intern Med* 2000;160:809-15.  
39  
40  
41  
42
- 43 8. Chang CH, Lin CH, Caffrey JL, Lee YC, Liu YC, Lin JW, et al. Risk of Intracranial  
44  
45 Hemorrhage From Statin Use in Asians: A Nationwide Cohort Study. *Circulation*  
46  
47 2015;131:2070-8.  
48  
49  
50
- 51 9. Cheng CL, Kao YH, Lin SJ, Lee CH, Lai ML. Validation of the National Health  
52  
53 Insurance Research Database with ischemic stroke cases in Taiwan.  
54  
55

- 1  
2  
3  
4 *Pharmacoepidemiology and drug safety* 2011;20:236-42.  
5  
6  
7  
8 10. Peter C. Austin, “An introduction to propensity score methods for reducing the effects of  
9 confounding in observational studies”, *Multivariate Behav Res.* 2011 May; 46(3): 399–  
10 424  
11  
12  
13  
14  
15 11. Markovic JN, Shortell CK. Genomics of varicose veins and chronic venous insufficiency.  
16 *Semin Vasc Surg* 2013;26:2-13.11.  
17  
18  
19  
20 12. Komarów W, Hawro P, Lekston A, Urbanek T, Zagrodzki P. Endothelial dysfunction in  
21 patients with chronic venous disease: an evaluation based on the flow-mediated dilatation  
22 test. *Int Angiol.* 2015;34:36-42.  
23  
24  
25  
26  
27  
28 13. Jacob T, Hingorani A, Ascher E. Overexpression of transforming growth factor-beta 1  
29 correlates with increased synthesis of nitric oxide synthase in varicose veins. *J Vasc Surg*  
30 2005;41:523-30.  
31  
32  
33  
34  
35  
36 14. Makivaara LA, Ahti TM, Luukkaala T, Hakama M, Laurikka JO. Persons with varicose  
37 veins have a high subsequent incidence of arterial disease: a population-based study in  
38 Tampere, Finland. *Angiology* 2007;58:704-9.  
39  
40  
41  
42  
43  
44 15. Piazza G, Goldhaber SZ. Venous thromboembolism and atherothrombosis: an integrated  
45 approach. *Circulation* 2010;121:2146-50.  
46  
47  
48  
49 16. Chang SL, Huang YL, Lee MC, Hu S, Hsiao YC, Chang SW, et al.  
50 Association of Varicose Veins With Incident Venous Thromboembolism and Peripheral  
51 Artery Disease. *JAMA.* 2018 Feb 27;319(8):807-817.  
52  
53  
54  
55



- 1  
2  
3  
4 17. Sørensen HT, Horvath-Puho E, Lash TL, Christiansen CF, Pesavento R, Pedersen L, et  
5  
6 al. Heart disease may be a risk factor for pulmonary embolism without peripheral deep  
7  
8 venous thrombosis. *Circulation* 2011;124:1435-41.  
9  
10  
11  
12 18. Sorensen HT, Horvath-Puho E, Pedersen L, Baron JA, Prandoni P. Venous  
13  
14 thromboembolism and subsequent hospitalisation due to acute arterial cardiovascular  
15  
16 events: a 20-year cohort study. *Lancet* 2007;370:1773-9.  
17  
18  
19  
20 19. Heit JA, Silverstein MD, Mohr DN, Petterson TM, O'Fallon WM, Melton LJ 3rd. Risk  
21  
22 factors for deep vein thrombosis and pulmonary embolism: a population-based case-  
23  
24 control study. *Arch Intern Med.* 2000;160:809-15  
25  
26  
27  
28 20. Lohr JM, Bush RL. Venous disease in women: epidemiology, manifestations,  
29  
30 and treatment. *J Vasc Surg.* 2013;57(4 Suppl):37S-45S.  
31  
32  
33  
34 21. Fowkes FG, Lee AJ, Evans CJ, Allan PL, Bradbury AW, Ruckley CV. Lifestyle risk  
35  
36 factors for lower limb venous reflux in the general population: Edinburgh Vein Study. *Int*  
37  
38 *J Epidemiol* 2001;30:846-52.  
39  
40  
41  
42  
43 22. Hsieh CY, Su CC, Shao SC, Sung SF, Lin SJ, Kao Yang YH, et al. Taiwan's National  
44  
45 Health Insurance Research Database: past and future. *Clin Epidemiol.* 2019;11:349-358  
46  
47  
48  
49  
50  
51  
52  
53  
54  
55

## Figure legends

**Figure 1.** (A) Kaplan-Meier estimates of 12-year survival between patients with varicose veins (VV) and the matched control cohort. (B) Kaplan-Meier estimates of 12-year survival between patients with VV categorized by the disease severities and the matched control cohort.

**Figure 2.** (A) Kaplan-Meier estimates of 12-year free from MACE between patients with varicose veins (VV) and the matched control cohort. (B) Kaplan-Meier estimates of 12-year free from MACE between patients with VV categorized by the disease severities and the matched control cohort.

**Table 1.** Baseline characteristics and comorbid medical disorders for the control cohort and patients with varicose vein (VV).

| Characteristic, n (%)          | Varicose vein, n = 4644 | Matched controls, n = 17742 | Standardized difference |
|--------------------------------|-------------------------|-----------------------------|-------------------------|
| <b>Age (years)</b>             |                         |                             | 0.02275                 |
| < 65                           | 3164 (68.13)            | 12275 (69.19)               |                         |
| ≥ 65                           | 1480 (31.87)            | 5467 (30.81)                |                         |
| <b>Age(mean±SD)</b>            | 55.70 ± 16.03           | 56.10 ± 16.04               | 0.02514                 |
| <b>Gender</b>                  |                         |                             | 0.00944                 |
| Male                           | 1796 (38.67)            | 6780 (38.21)                |                         |
| Female                         | 2848 (61.33)            | 10962 (61.79)               |                         |
| <b>Hypertension</b>            |                         |                             | 0.04519                 |
| No                             | 3750 (80.75)            | 14637 (82.50)               |                         |
| Yes                            | 894 (19.25)             | 3105 (17.50)                |                         |
| <b>Diabetes</b>                |                         |                             | 0.05807                 |
| No                             | 4247 (91.45)            | 16501 (93.01)               |                         |
| Yes                            | 397 (8.55)              | 1241 (6.99)                 |                         |
| <b>Hyperlipidemia</b>          |                         |                             | 0.08429                 |
| No                             | 4413 (95.03)            | 17157 (96.70)               |                         |
| Yes                            | 231 (4.97)              | 585 (3.30)                  |                         |
| <b>Coronary artery disease</b> |                         |                             | 0.07832                 |
| No                             | 4489 (96.66)            | 17375 (97.93)               |                         |
| Yes                            | 155 (3.34)              | 367 (2.07)                  |                         |

P-value was calculated based on the two sample t test and Pearson's chi-square test.

**Table 2.** Crude and adjusted hazard ratios of all-cause mortality in patients with VV compared with the matched control cohort during the follow-up period.

| Cohort<br>All (n =22386)       | Crude HR (95% CI)  | p-value   | Adjusted HR (95% CI)* | p-value  |
|--------------------------------|--------------------|-----------|-----------------------|----------|
| <b>Overall analysis</b>        |                    |           |                       |          |
| VV                             | 1.43 (1.25, 1.64)  | <0.0001†  | 1.37 (1.19, 1.57)     | <0.0001† |
| Controls                       | 1[reference]       |           | 1[reference]          |          |
| <b>Stratified analysis</b>     |                    |           |                       |          |
| <b>Age (years)</b>             |                    |           |                       |          |
| <b>&lt; 65 (years)</b>         |                    |           |                       |          |
| VV                             | 1.49 (1.144, 1.93) | 0.0030†   | 1.2 (0.92, 1.57)      | 0.1803   |
| Controls                       | 1[reference]       |           | 1[reference]          |          |
| <b>≥65 (years)</b>             |                    |           |                       |          |
| VV                             | 1.41 (1.2, 1.66)   | < 0.0001† | 1.38 (1.17, 1.62)     | 0.0001†  |
| Controls                       | 1[reference]       |           | 1[reference]          |          |
| <b>Gender</b>                  |                    |           |                       |          |
| <b>Male</b>                    |                    |           |                       |          |
| VV                             | 1.46 (1.23, 1.74)  | < 0.0001† | 1.41 (1.181, 1.68)    | 0.0001†  |
| Controls                       | 1[reference]       |           | 1[reference]          |          |
| <b>Female</b>                  |                    |           |                       |          |
| VV                             | 1.38 (1.1, 1.74)   | 0.0058†   | 1.31 (1.04, 1.65)     | 0.0227†  |
| Controls                       | 1[reference]       |           | 1[reference]          |          |
| <b>Hypertension</b>            |                    |           |                       |          |
| VV                             | 1.14 (0.87, 1.49)  | 0.3476    | 1.16 (0.88, 1.52)     | 0.2957   |
| Controls                       | 1[reference]       |           | 1[reference]          |          |
| <b>Diabetes</b>                |                    |           |                       |          |
| VV                             | 1.5 (1.06, 2.14)   | 0.0226†   | 1.5 (1.05, 2.15)      | 0.0254†  |
| Controls                       | 1[reference]       |           | 1[reference]          |          |
| <b>Hyperlipidemia</b>          |                    |           |                       |          |
| VV                             | 0.99 (0.39, 2.54)  | 0.9865    | 1.01 (0.39, 2.61)     | 0.9914   |
| Controls                       | 1[reference]       |           | 1[reference]          |          |
| <b>Coronary artery disease</b> |                    |           |                       |          |
| VV                             | 1.14 (0.64, 2.03)  | 0.6565    | 1.05 (0.58, 1.92)     | 0.8716   |
| Controls                       | 1[reference]       |           | 1[reference]          |          |

HR = Hazard Ratio; CI = Confidence Interval

†p<0.05

\*Adjusted for chronic obstructive pulmonary disease, cancer, atrial fibrillation, heart failure, ischemic heart disease, chronic renal insufficiency

**Table 3.** Crude and adjusted hazard ratios of major cardiovascular events (MACE) in patients with VV compared with the matched control cohort during the follow-up period

| Cohort<br>All (n =22386)       | Crude HR (95% CI) | p-value   | Adjusted HR (95% CI)* | p-value   |
|--------------------------------|-------------------|-----------|-----------------------|-----------|
| <b>Overall analysis</b>        |                   |           |                       |           |
| VV                             | 2.08 (1.91, 2.25) | < 0.0001† | 2.05 (1.89, 2.23)     | < 0.0001† |
| Controls                       | 1[reference]      |           | 1[reference]          |           |
| <b>Stratified analysis</b>     |                   |           |                       |           |
| <b>Age (years)</b>             |                   |           |                       |           |
| <b>&lt; 65 (years)</b>         |                   |           |                       |           |
| VV                             | 2.21 (1.95, 2.5)  | < 0.0001† | 2.17 (1.92, 2.46)     | < 0.0001† |
| Controls                       | 1[reference]      |           | 1[reference]          |           |
| <b>≥65 (years)</b>             |                   |           |                       |           |
| VV                             | 1.98 (1.78, 2.21) | < 0.0001† | 1.96 (1.76, 2.18)     | < 0.0001† |
| Controls                       | 1[reference]      |           | 1[reference]          |           |
| <b>Gender</b>                  |                   |           |                       |           |
| <b>Male</b>                    |                   |           |                       |           |
| VV                             | 2.35 (2.09, 2.65) | < 0.0001† | 2.32 (2.06, 2.62)     | < 0.0001† |
| Controls                       | 1[reference]      |           | 1[reference]          |           |
| <b>Female</b>                  |                   |           |                       |           |
| VV                             | 1.87 (1.67, 2.09) | < 0.0001† | 1.85 (1.66, 2.07)     | < 0.0001† |
| Controls                       | 1[reference]      |           | 1[reference]          |           |
| <b>Hypertension</b>            |                   |           |                       |           |
| VV                             | 1.65 (1.42, 1.92) | < 0.0001† | 1.62 (1.39, 1.89)     | < 0.0001† |
| Controls                       | 1[reference]      |           | 1[reference]          |           |
| <b>Diabetes</b>                |                   |           |                       |           |
| VV                             | 1.4 (1.11, 1.76)  | 0.0042†   | 1.37 (1.08, 1.72)     | 0.0081    |
| Controls                       | 1[reference]      |           | 1[reference]          |           |
| <b>Hyperlipidemia</b>          |                   |           |                       |           |
| VV                             | 1.5 (1.03, 2.17)  | 0.0353†   | 1.56 (1.07, 2.29)     | 0.0224    |
| Controls                       | 1[reference]      |           | 1[reference]          |           |
| <b>Coronary artery disease</b> |                   |           |                       |           |
| VV                             | 1.93 (1.38, 2.7)  | 0.0001†   | 1.99 (1.41, 2.82)     | 0.0001†   |
| Controls                       | 1[reference]      |           | 1[reference]          |           |

HR = Hazard Ratio; CI = Confidence Interval

†p&lt;0.05

\*Adjusted for chronic obstructive pulmonary disease, cancer, atrial fibrillation, heart failure,

1  
2  
3  
4 ischemic heart disease, chronic renal insufficiency  
5  
6  
7  
8  
9  
10  
11  
12  
13  
14  
15  
16  
17  
18  
19  
20  
21  
22  
23  
24  
25  
26  
27  
28  
29  
30  
31  
32  
33  
34  
35  
36  
37  
38  
39  
40  
41  
42  
43  
44  
45  
46  
47  
48  
49  
50  
51  
52  
53  
54  
55  
56  
57  
58  
59  
60

For peer review only

**Table 4.** The adjusted hazard ratios of mortality and major cardiovascular adverse events (MACE) in patients with VV compared with the matched control cohort during the follow-up period.

|                                           | Grade 1 Control | Grade 1              | Grade 2 Control | Grade 2              | Grade 3 Control | Grade 3                |
|-------------------------------------------|-----------------|----------------------|-----------------|----------------------|-----------------|------------------------|
| No. of mortality, N (%)                   | 343 (3.62)      | 99 (4.01)            | 147 (5.79)      | 44 (6.59)            | 266 (4.65)      | 136 (9.01)             |
| Adjusted HR for mortality (95% CI)*       | Referent        | 1.08 (0.86, 1.36)    | Referent        | 1.13 (0.8, 1.6)      | Referent        | 1.83 (1.48, 2.27) †    |
| No. of CHF, N (%)                         | 552 (5.82)      | 238 (9.65)           | 181 (7.12)      | 80 (11.98)           | 358 (6.26)      | 190 (12.59)            |
| Adjusted HR for CHF (95% CI)*             | Referent        | 1.68 (1.44, 1.96)†   | Referent        | 1.79 (1.37, 2.34)†   | Referent        | 2.05 (1.71, 2.46) †    |
| No. of ACS, N (%)                         | 291 (3.07)      | 125 (5.07)           | 72 (2.83)       | 24 (3.59)            | 174 (3.04)      | 95 (6.30)              |
| Adjusted HR for ACS (95% CI)*             | Referent        | 1.7 (1.37, 2.11)†    | Referent        | 1.25 (0.78, 1.99)    | Referent        | 2.04 (1.58, 2.63) †    |
| No. of ischemic stroke, N (%)             | 236 (2.49)      | 99 (4.01)            | 90 (3.54)       | 31 (4.64)            | 162 (2.83)      | 89 (5.90)              |
| Adjusted HR for ischemic stroke (95% CI)* | Referent        | 1.59 (1.25, 2.01)†   | Referent        | 1.4 (0.92, 2.12)     | Referent        | 2.06 (1.58, 2.69) †    |
| No. of DVT +PE, N (%)                     | 14 (0.15)       | 56 (2.27)            | 7 (0.28)        | 13 (1.95)            | 6 (0.10)        | 63 (4.17)              |
| Adjusted HR for DVT+PE (95% CI)*          | Referent        | 14.9 (8.26, 26.86) † | Referent        | 6.27 (2.46, 15.96) † | Referent        | 38.42 (16.38, 90.13) † |

†p<0.05; HR = Hazard Ratio; CI = Confidence Interval; CHF=congestive heart failure; ACS= acute coronary syndrome; DVT = deep vein thrombosis; PE= pulmonary embolism

\*Adjusted for chronic obstructive pulmonary disease, cancer, atrial fibrillation, heart failure, ischemic heart disease, chronic renal insufficiency

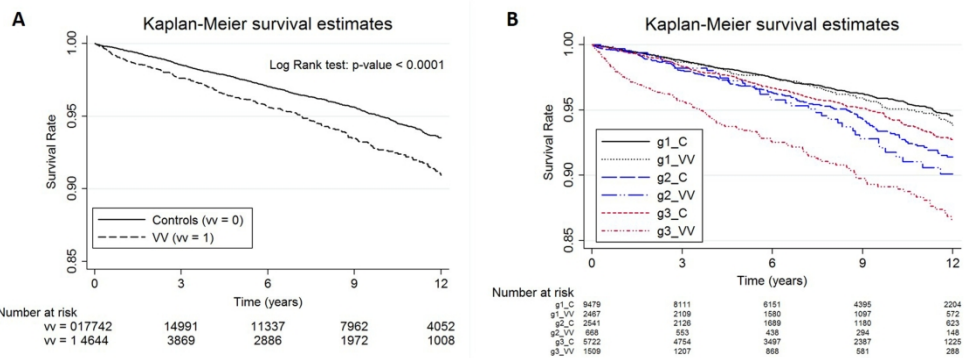

Figure 1. (A) Kaplan-Meier estimates of 12-year survival between patients with varicose veins (VV) and the matched control cohort. (B) Kaplan-Meier estimates of 12-year survival between patients with VV categorized by the disease severities and the matched control cohort.

290x107mm (300 x 300 DPI)



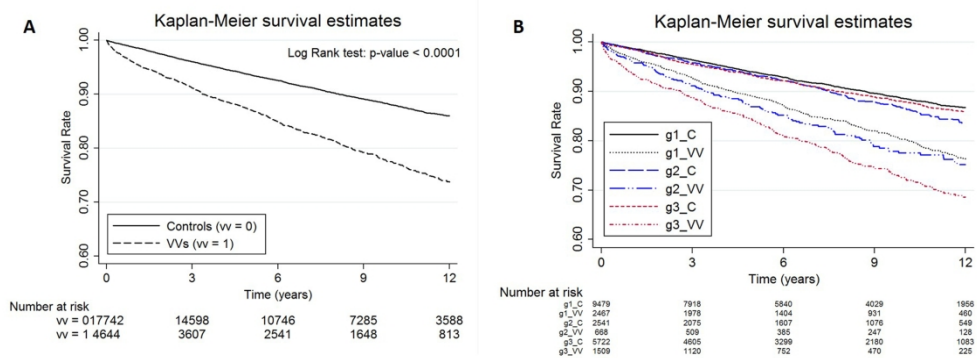

Figure 2. (A) Kaplan-Meier estimates of 12-year free from MACE between patients with varicose veins (VV) and the matched control cohort. (B) Kaplan-Meier estimates of 12-year free from MACE between patients with VV categorized by the disease severities and the matched control cohort.

314x116mm (300 x 300 DPI)

**Supplementary Table 1.** Clinical characteristics and comorbid medical disorders for patients with VV categorized by the disease severity.

| Characteristic                      | Grade 1, n=2467   | Grade 2, n=668    | Grade 3, n=1509   |                |
|-------------------------------------|-------------------|-------------------|-------------------|----------------|
| <b>n (%)</b>                        |                   |                   |                   | <b>P-value</b> |
| <b>Age (years)</b>                  |                   |                   |                   | < 0.0001       |
| $\geq 65$                           | 1756 (71.18)      | 428 (64.07)       | 529 (35.06)       |                |
| < 65                                | 711 (28.82)       | 240 (35.93)       | 980 (64.94)       |                |
| <b>Age (mean<math>\pm</math>SD)</b> | 55.57 $\pm$ 14.76 | 57.20 $\pm$ 17.45 | 56.50 $\pm$ 17.31 |                |
| <b>Gender</b>                       |                   |                   |                   | 0.0332         |
| Male                                | 773 (31.33)       | 277 (41.47)       | 746 (49.44)       |                |
| Female                              | 1694 (68.67)      | 391 (58.53)       | 763 (50.56)       |                |
| <b>Hypertension</b>                 |                   |                   |                   | 0.0721         |
| No                                  | 2020 (81.88)      | 539 (80.69)       | 1191 (78.93)      |                |
| Yes                                 | 447 (18.12)       | 129 (19.31)       | 318 (21.07)       |                |
| <b>Diabetes</b>                     |                   |                   |                   | < 0.0001       |
| No                                  | 2296 (93.07)      | 617 (92.37)       | 1334 (88.40)      |                |
| Yes                                 | 171 (6.93)        | 51 (7.63)         | 175 (11.60)       |                |
| <b>Hyperlipidemia</b>               |                   |                   |                   | 0.8288         |
| No                                  | 2342 (94.93)      | 633 (94.76)       | 1468 (95.29)      |                |
| Yes                                 | 125 (5.07)        | 35 (5.24)         | 71 (4.71)         |                |
| <b>Coronary artery disease</b>      |                   |                   |                   | 0.6442         |
| No                                  | 2379 (96.43)      | 648 (97.01)       | 1462 (96.89)      |                |
| Yes                                 | 88 (3.57)         | 20 (2.99)         | 47 (3.11)         |                |

P-value was calculated based on the two sample t test and Pearson's chi-square test.

**Supplement Table 2.** Baseline characteristics and comorbid medical disorders for the control cohort and patients with varicose vein (VV).

| Characteristic                      | Varicose vein Grade1 | Varicose vein Grade1 control | Standardized difference | Varicose vein Grade2 | Varicose vein Grade2 control | Standardized difference | Varicose vein Grade3 | Varicose vein Grade3 control | Standardized difference |
|-------------------------------------|----------------------|------------------------------|-------------------------|----------------------|------------------------------|-------------------------|----------------------|------------------------------|-------------------------|
| <b>n (%)</b>                        | <b>n = 2467</b>      | <b>n = 9497</b>              |                         | <b>n = 668</b>       | <b>n = 2541</b>              |                         | <b>n = 1509</b>      | <b>n = 5722</b>              |                         |
| <b>Age (years)</b>                  |                      |                              | 0.02882                 |                      |                              | 0.01557                 |                      |                              | 0.01539                 |
| $\geq 65$                           | 1756 (71.18)         | 6870 (72.48)                 |                         | 428 (64.07)          | 1647 (64.82)                 |                         | 529 (35.06)          | 1964 (34.32)                 |                         |
| < 65                                | 711 (28.82)          | 2609 (27.52)                 |                         | 240 (35.93)          | 894 (35.18)                  |                         | 980 (64.94)          | 3758 (65.68)                 |                         |
| <b>Age (mean<math>\pm</math>SD)</b> | 55.57 $\pm$ 14.76    | 55.14 $\pm$ 14.69            | 0.02891                 | 57.20 $\pm$ 17.45    | 56.91 $\pm$ 17.52            | 0.01664                 | 56.50 $\pm$ 17.31    | 56.09 $\pm$ 17.38            | 0.02336                 |
| <b>Gender</b>                       |                      |                              | 0.00891                 |                      |                              | 0.01014                 |                      |                              | 0.00726                 |
| Male                                | 773 (31.33)          | 2931 (30.92)                 |                         | 277 (41.47)          | 1041 (40.97)                 |                         | 746 (49.44)          | 2808 (49.07)                 |                         |
| Female                              | 1694 (68.67)         | 6548 (69.08)                 |                         | 391 (58.53)          | 1500 (59.03)                 |                         | 763 (50.56)          | 2914 (50.93)                 |                         |
| <b>Hypertension</b>                 |                      |                              | 0.03885                 |                      |                              | 0.04022                 |                      |                              | 0.05681                 |
| No                                  | 2020 (81.88)         | 7901 (83.35)                 |                         | 539 (80.69)          | 2090 (82.25)                 |                         | 1191 (78.93)         | 4646 (81.20)                 |                         |
| Yes                                 | 447 (18.12)          | 1578 (16.65)                 |                         | 129 (19.31)          | 451 (17.75)                  |                         | 318 (21.07)          | 1076 (18.80)                 |                         |
| <b>Diabetes</b>                     |                      |                              | 0.04942                 |                      |                              | 0.06897                 |                      |                              | 0.06569                 |
| No                                  | 2296 (93.07)         | 8936 (94.27)                 |                         | 617 (92.37)          | 2391 (94.10)                 |                         | 1334 (88.40)         | 5174 (90.42)                 |                         |
| Yes                                 | 171 (6.93)           | 543 (5.73)                   |                         | 51 (7.63)            | 150 (5.90)                   |                         | 175 (11.60)          | 548 (9.58)                   |                         |
| <b>Hyperlipidemia</b>               |                      |                              | 0.08073                 |                      |                              | 0.09142                 |                      |                              | 0.08733                 |
| No                                  | 2342 (94.93)         | 9153 (96.56)                 |                         | 633 (94.76)          | 2455 (96.62)                 |                         | 1468 (95.29)         | 5549 (96.98)                 |                         |
| Yes                                 | 125 (5.07)           | 326 (3.44)                   |                         | 35 (5.24)            | 86 (3.38)                    |                         | 71 (4.71)            | 173 (3.02)                   |                         |
| <b>Coronary artery disease</b>      |                      |                              | 0.07654                 |                      |                              | 0.07737                 |                      |                              | 0.08244                 |
| No                                  | 2379 (96.43)         | 9263 (97.72)                 |                         | 648 (97.01)          | 2495 (98.19)                 |                         | 1462 (96.89)         | 5617 (98.16)                 |                         |
| Yes                                 | 88 (3.57)            | 216 (2.28)                   |                         | 20 (2.99)            | 46 (1.81)                    |                         | 47 (3.11)            | 105 (1.84)                   |                         |

**Supplement Table 3. ICD-9 codes versus chart review diagnosis among outpatients with VV**

| Code                                                        | No.  | Clinical diagnosis | No.  |
|-------------------------------------------------------------|------|--------------------|------|
| <b>454.9 Asymptomatic varicose veins</b>                    | 1188 | VV                 | 1188 |
|                                                             |      | Others             | 0    |
| <b>454.1 With inflammation</b>                              | 775  | VV                 | 775  |
|                                                             |      | Others             | 0    |
| <b>454.0 Varicose veins of lower extremities With ulcer</b> | 152  | VV                 | 152  |
|                                                             |      | Others             | 0    |
| <b>454.2 With ulcer and inflammation</b>                    | 87   | VV                 | 87   |
|                                                             |      | Others             | 0    |

**Supplement Table 4.** ICD-9 codes-derived severity grading versus Clinical–  
Etiological–Anatomical–Pathophysiological (CEAP) stages of inpatients with VV

| Code                                                       | No. | CEAP stage | No. |
|------------------------------------------------------------|-----|------------|-----|
| 454.9 Asymptomatic<br>varicose veins                       | 193 | C0-2       | 183 |
|                                                            |     | C3-4       | 6   |
|                                                            |     | C5-6       | 4   |
| 454.1 With<br>inflammation                                 | 56  | C0-2       | 0   |
|                                                            |     | C3-4       | 56  |
|                                                            |     | C5-6       | 0   |
| 454.0 Varicose veins of<br>lower extremities With<br>ulcer | 86  | C0-2       | 6   |
|                                                            |     | C3-4       | 0   |
|                                                            |     | C5-6       | 80  |
| 454.2 With ulcer and<br>inflammation                       | 12  |            |     |

|        | CEAP 0-2       | Not CEAP       |                |
|--------|----------------|----------------|----------------|
| Test + | 183            | 10             | 183/193 (94.8) |
| Test - | 6              | 136            | 136/142 (95.7) |
|        | 183/189 (96.8) | 136/146 (93.1) |                |

| Statistic                        | Estimate | 95% CI           |
|----------------------------------|----------|------------------|
| <b>Sensitivity</b>               | 96.83%   | 93.22% to 98.83% |
| <b>Specificity</b>               | 93.15 %  | 87.76% to 96.67% |
| <b>Positive Predictive Value</b> | 94.82%   | 90.95% to 97.08% |
| <b>Negative Predictive Value</b> | 95.77 %  | 91.15% to 98.03% |

|        | CEAP 3-4     | Not CEAP      |                |
|--------|--------------|---------------|----------------|
| Test + | 56           | 0             | 56/56 (100)    |
| Test - | 6            | 273           | 273/279 (97.8) |
|        | 56/62 (90.3) | 273/273 (100) |                |

| Statistic                        | Estimate | 95% CI            |
|----------------------------------|----------|-------------------|
| <b>Sensitivity</b>               | 90.32%   | 80.12% to 96.37%  |
| <b>Specificity</b>               | 100.00 % | 98.66% to 100.00% |
| <b>Positive Predictive Value</b> | 100.00%  |                   |
| <b>Negative Predictive Value</b> | 97.85 %  | 95.51% to 98.98%  |

|        |              |                |                |
|--------|--------------|----------------|----------------|
|        | CEAP 5-6     | Not CEAP       |                |
| Test + | 80           | 6              | 80/86 (93)     |
| Test - | 4            | 245            | 245/249 (98.4) |
|        | 80/84 (95.2) | 245/251 (97.6) |                |

| <b>Statistic</b>                 | <b>Estimate</b> | <b>95% CI</b>    |
|----------------------------------|-----------------|------------------|
| <b>Sensitivity</b>               | 95.24%          | 88.25% to 98.69% |
| <b>Specificity</b>               | 97.61 %         | 94.87% to 99.12% |
| <b>Positive Predictive Value</b> | 93.02%          | 85.79% to 96.71% |
| <b>Negative Predictive Value</b> | 98.39 %         | 95.92% to 99.38% |

**Supplement Table 5.** Sensitivity analysis of hazard ratio in patients with VV compared with the matched control cohort

|                                                                          | VV                           | Control    |
|--------------------------------------------------------------------------|------------------------------|------------|
| <b>History of pregnancy (ICD-9-CM : V22, V23.2, 761.5), N(%)</b>         | 169 (3.64)                   | 598 (3.37) |
| <b>Adjusted HR (95% CI); p-value<sup>2</sup></b>                         |                              |            |
| all-cause mortality as endpoint                                          | 1.37 (1.19, 1.57); < 0.0001  | Reference  |
| MACE as endpoint                                                         | 2.06 (1.89, 2.23); < 0.0001  | Reference  |
| <b>For Grade 3 and matched controls</b>                                  |                              |            |
| all-cause mortality as endpoint                                          | 1.84 (1.48, 2.28); < 0.0001  | Reference  |
| MACE as endpoint                                                         | 2.46 (2.14, 2.82); < 0.0001  | Reference  |
| <b>Myocardial infarction, stroke, coronary angioplasty or CABG, N(%)</b> | 19 (0.41)                    | 457 (2.58) |
| <b>Adjusted HR (95% CI); p-value<sup>3</sup></b>                         |                              |            |
| all-cause mortality as endpoint                                          | 1.36 (1.18, 1.57); < 0.0001  | Reference  |
| MACE as endpoint                                                         | 1.95 (1.8, 2.12); < 0.0001   | Reference  |
| <b>For Grade 3 and matched controls</b>                                  |                              |            |
| all-cause mortality as endpoint                                          | 1.84 (1.49, 2.28) ; < 0.0001 | Reference  |
| MACE as endpoint                                                         | 2.32 (2.02, 2.66); < 0.0001  | Reference  |

HR = Hazard Ratio; CI = Confidence Interval

<sup>2</sup> Adjusted for history of pregnancy, age, gender, hypertension, diabetes, hyperlipidemia, coronary artery disease, chronic obstructive pulmonary disease, cancer, atrial fibrillation, heart failure, ischemic heart disease, chronic renal insufficiency

<sup>3</sup> HR is calculated for population without history of Myocardial infarction, stroke, coronary angioplasty or CABG and the value is adjusted for age, gender, hypertension, diabetes, hyperlipidemia, coronary artery disease, chronic obstructive pulmonary disease, cancer, atrial fibrillation, heart failure, ischemic heart disease, chronic renal insufficiency

STROBE Statement—Checklist of items that should be included in reports of *cohort studies*

|                              | Item No | Recommendation                                                                                                                                                                                    | Page No |
|------------------------------|---------|---------------------------------------------------------------------------------------------------------------------------------------------------------------------------------------------------|---------|
| <b>Title and abstract</b>    | 1       | (a) Indicate the study's design with a commonly used term in the title or the abstract                                                                                                            | 1       |
|                              |         | (b) Provide in the abstract an informative and balanced summary of what was done and what was found                                                                                               | 3       |
| <b>Introduction</b>          |         |                                                                                                                                                                                                   |         |
| Background/rationale         | 2       | Explain the scientific background and rationale for the investigation being reported                                                                                                              | 5       |
| Objectives                   | 3       | State specific objectives, including any prespecified hypotheses                                                                                                                                  | 5       |
| <b>Methods</b>               |         |                                                                                                                                                                                                   |         |
| Study design                 | 4       | Present key elements of study design early in the paper                                                                                                                                           | 6       |
| Setting                      | 5       | Describe the setting, locations, and relevant dates, including periods of recruitment, exposure, follow-up, and data collection                                                                   | 6       |
| Participants                 | 6       | (a) Give the eligibility criteria, and the sources and methods of selection of participants. Describe methods of follow-up                                                                        | 6       |
|                              |         | (b) For matched studies, give matching criteria and number of exposed and unexposed                                                                                                               | 6       |
| Variables                    | 7       | Clearly define all outcomes, exposures, predictors, potential confounders, and effect modifiers. Give diagnostic criteria, if applicable                                                          | 6       |
| Data sources/<br>measurement | 8*      | For each variable of interest, give sources of data and details of methods of assessment (measurement). Describe comparability of assessment methods if there is more than one group              | 6       |
| Bias                         | 9       | Describe any efforts to address potential sources of bias                                                                                                                                         | 6       |
| Study size                   | 10      | Explain how the study size was arrived at                                                                                                                                                         | 7       |
| Quantitative variables       | 11      | Explain how quantitative variables were handled in the analyses. If applicable, describe which groupings were chosen and why                                                                      | 7       |
| Statistical methods          | 12      | (a) Describe all statistical methods, including those used to control for confounding                                                                                                             | 8       |
|                              |         | (b) Describe any methods used to examine subgroups and interactions                                                                                                                               | 9       |
|                              |         | (c) Explain how missing data were addressed                                                                                                                                                       | 9       |
|                              |         | (d) If applicable, explain how loss to follow-up was addressed                                                                                                                                    | 9       |
|                              |         | (e) Describe any sensitivity analyses                                                                                                                                                             | 9       |
| <b>Results</b>               |         |                                                                                                                                                                                                   |         |
| Participants                 | 13*     | (a) Report numbers of individuals at each stage of study—eg numbers potentially eligible, examined for eligibility, confirmed eligible, included in the study, completing follow-up, and analysed | 10      |
|                              |         | (b) Give reasons for non-participation at each stage                                                                                                                                              | 10      |
|                              |         | (c) Consider use of a flow diagram                                                                                                                                                                | 10      |
| Descriptive data             | 14*     | (a) Give characteristics of study participants (eg demographic, clinical, social) and information on exposures and potential confounders                                                          | 10      |
|                              |         | (b) Indicate number of participants with missing data for each variable of interest                                                                                                               | 10      |
|                              |         | (c) Summarise follow-up time (eg, average and total amount)                                                                                                                                       | 10      |
| Outcome data                 | 15*     | Report numbers of outcome events or summary measures over time                                                                                                                                    | 10      |



|    |                          |    |                                                                                                                                                                                                              |    |
|----|--------------------------|----|--------------------------------------------------------------------------------------------------------------------------------------------------------------------------------------------------------------|----|
| 1  | Main results             | 16 | (a) Give unadjusted estimates and, if applicable, confounder-adjusted estimates and their precision (eg, 95% confidence interval). Make clear which confounders were adjusted for and why they were included | 11 |
| 2  |                          |    | (b) Report category boundaries when continuous variables were categorized                                                                                                                                    | 11 |
| 3  |                          |    | (c) If relevant, consider translating estimates of relative risk into absolute risk for a meaningful time period                                                                                             | 11 |
| 4  |                          |    |                                                                                                                                                                                                              |    |
| 5  | Other analyses           | 17 | Report other analyses done—eg analyses of subgroups and interactions, and sensitivity analyses                                                                                                               | 11 |
| 6  |                          |    |                                                                                                                                                                                                              |    |
| 7  |                          |    |                                                                                                                                                                                                              |    |
| 8  |                          |    |                                                                                                                                                                                                              |    |
| 9  |                          |    |                                                                                                                                                                                                              |    |
| 10 |                          |    |                                                                                                                                                                                                              |    |
| 11 | <b>Discussion</b>        |    |                                                                                                                                                                                                              |    |
| 12 | Key results              | 18 | Summarise key results with reference to study objectives                                                                                                                                                     | 12 |
| 13 | Limitations              | 19 | Discuss limitations of the study, taking into account sources of potential bias or imprecision. Discuss both direction and magnitude of any potential bias                                                   | 12 |
| 14 |                          |    |                                                                                                                                                                                                              |    |
| 15 | Interpretation           | 20 | Give a cautious overall interpretation of results considering objectives, limitations, multiplicity of analyses, results from similar studies, and other relevant evidence                                   | 13 |
| 16 |                          |    |                                                                                                                                                                                                              |    |
| 17 | Generalisability         | 21 | Discuss the generalisability (external validity) of the study results                                                                                                                                        | 14 |
| 18 |                          |    |                                                                                                                                                                                                              |    |
| 19 |                          |    |                                                                                                                                                                                                              |    |
| 20 |                          |    |                                                                                                                                                                                                              |    |
| 21 | <b>Other information</b> |    |                                                                                                                                                                                                              |    |
| 22 | Funding                  | 22 | Give the source of funding and the role of the funders for the present study and, if applicable, for the original study on which the present article is based                                                | 15 |
| 23 |                          |    |                                                                                                                                                                                                              |    |
| 24 |                          |    |                                                                                                                                                                                                              |    |

25  
26 \*Give information separately for exposed and unexposed groups.

27  
28 **Note:** An Explanation and Elaboration article discusses each checklist item and gives methodological background and  
29 published examples of transparent reporting. The STROBE checklist is best used in conjunction with this article (freely  
30 available on the Web sites of PLoS Medicine at <http://www.plosmedicine.org/>, Annals of Internal Medicine at  
31 <http://www.annals.org/>, and Epidemiology at <http://www.epidem.com/>). Information on the STROBE Initiative is  
32 available at <http://www.strobe-statement.org>.  
33  
34  
35  
36  
37  
38  
39  
40  
41  
42  
43  
44  
45  
46  
47  
48  
49  
50  
51  
52  
53  
54  
55  
56  
57  
58  
59  
60
