# Supplementary material for: Severe varicose veins and the risk of mortality: a nationwide population-based cohort study
Source: PubMed Central journal article supplement — BMJ Open. 2020 Jun 21;10(6):e034245. doi: 10.1136/bmjopen-2019-034245 (PMC7311034; doi:10.1136/bmjopen-2019-034245), 2020-06-21
Supplement: bmjopen-2019-034245supp001.pdf [file bmjopen-2019-034245supp001.pdf]

**Supplementary Table 1.** Clinical characteristics and comorbid medical disorders for patients with VV categorized by the disease severity.

| Characteristic                 | Grade 1, n=2467 | Grade 2, n=668 | Grade 3, n=1509 | P-value  |
|--------------------------------|-----------------|----------------|-----------------|----------|
| <b>n (%)</b>                   |                 |                |                 |          |
| <b>Age (years)</b>             |                 |                |                 | < 0.0001 |
| ≥ 65                           | 1756 (71.18)    | 428 (64.07)    | 529 (35.06)     |          |
| < 65                           | 711 (28.82)     | 240 (35.93)    | 980 (64.94)     |          |
| <b>Age (mean±SD)</b>           | 55.57 ± 14.76   | 57.20 ± 17.45  | 56.50 ± 17.31   |          |
| <b>Gender</b>                  |                 |                |                 | 0.0332   |
| Male                           | 773 (31.33)     | 277 (41.47)    | 746 (49.44)     |          |
| Female                         | 1694 (68.67)    | 391 (58.53)    | 763 (50.56)     |          |
| <b>Hypertension</b>            |                 |                |                 | 0.0721   |
| No                             | 2020 (81.88)    | 539 (80.69)    | 1191 (78.93)    |          |
| Yes                            | 447 (18.12)     | 129 (19.31)    | 318 (21.07)     |          |
| <b>Diabetes</b>                |                 |                |                 | < 0.0001 |
| No                             | 2296 (93.07)    | 617 (92.37)    | 1334 (88.40)    |          |
| Yes                            | 171 (6.93)      | 51 (7.63)      | 175 (11.60)     |          |
| <b>Hyperlipidemia</b>          |                 |                |                 | 0.8288   |
| No                             | 2342 (94.93)    | 633 (94.76)    | 1468 (95.29)    |          |
| Yes                            | 125 (5.07)      | 35 (5.24)      | 71 (4.71)       |          |
| <b>Coronary artery disease</b> |                 |                |                 | 0.6442   |
| No                             | 2379 (96.43)    | 648 (97.01)    | 1462 (96.89)    |          |
| Yes                            | 88 (3.57)       | 20 (2.99)      | 47 (3.11)       |          |

P-value was calculated based on the two sample t test and Pearson's chi-square test.

**Supplement Table 2.** Baseline characteristics and comorbid medical disorders for the control cohort and patients with varicose vein (VV).

| Characteristic                 | Varicose vein Grade1 | Varicose vein Grade1 control | Standardized difference | Varicose vein Grade2 | Varicose vein Grade2 control | Standardized difference | Varicose vein Grade3 | Varicose vein Grade3 control | Standardized difference |
|--------------------------------|----------------------|------------------------------|-------------------------|----------------------|------------------------------|-------------------------|----------------------|------------------------------|-------------------------|
| <b>n (%)</b>                   | <b>n = 2467</b>      | <b>n = 9497</b>              |                         | <b>n = 668</b>       | <b>n = 2541</b>              |                         | <b>n = 1509</b>      | <b>n = 5722</b>              |                         |
| <b>Age (years)</b>             |                      |                              | 0.02882                 |                      |                              | 0.01557                 |                      |                              | 0.01539                 |
| ≥ 65                           | 1756 (71.18)         | 6870 (72.48)                 |                         | 428 (64.07)          | 1647 (64.82)                 |                         | 529 (35.06)          | 1964 (34.32)                 |                         |
| < 65                           | 711 (28.82)          | 2609 (27.52)                 |                         | 240 (35.93)          | 894 (35.18)                  |                         | 980 (64.94)          | 3758 (65.68)                 |                         |
| <b>Age (mean±SD)</b>           | 55.57 ± 14.76        | 55.14 ± 14.69                | 0.02891                 | 57.20 ± 17.45        | 56.91 ± 17.52                | 0.01664                 | 56.50 ± 17.31        | 56.09 ± 17.38                | 0.02336                 |
| <b>Gender</b>                  |                      |                              | 0.00891                 |                      |                              | 0.01014                 |                      |                              | 0.00726                 |
| Male                           | 773 (31.33)          | 2931 (30.92)                 |                         | 277 (41.47)          | 1041 (40.97)                 |                         | 746 (49.44)          | 2808 (49.07)                 |                         |
| Female                         | 1694 (68.67)         | 6548 (69.08)                 |                         | 391 (58.53)          | 1500 (59.03)                 |                         | 763 (50.56)          | 2914 (50.93)                 |                         |
| <b>Hypertension</b>            |                      |                              | 0.03885                 |                      |                              | 0.04022                 |                      |                              | 0.05681                 |
| No                             | 2020 (81.88)         | 7901 (83.35)                 |                         | 539 (80.69)          | 2090 (82.25)                 |                         | 1191 (78.93)         | 4646 (81.20)                 |                         |
| Yes                            | 447 (18.12)          | 1578 (16.65)                 |                         | 129 (19.31)          | 451 (17.75)                  |                         | 318 (21.07)          | 1076 (18.80)                 |                         |
| <b>Diabetes</b>                |                      |                              | 0.04942                 |                      |                              | 0.06897                 |                      |                              | 0.06569                 |
| No                             | 2296 (93.07)         | 8936 (94.27)                 |                         | 617 (92.37)          | 2391 (94.10)                 |                         | 1334 (88.40)         | 5174 (90.42)                 |                         |
| Yes                            | 171 (6.93)           | 543 (5.73)                   |                         | 51 (7.63)            | 150 (5.90)                   |                         | 175 (11.60)          | 548 (9.58)                   |                         |
| <b>Hyperlipidemia</b>          |                      |                              | 0.08073                 |                      |                              | 0.09142                 |                      |                              | 0.08733                 |
| No                             | 2342 (94.93)         | 9153 (96.56)                 |                         | 633 (94.76)          | 2455 (96.62)                 |                         | 1468 (95.29)         | 5549 (96.98)                 |                         |
| Yes                            | 125 (5.07)           | 326 (3.44)                   |                         | 35 (5.24)            | 86 (3.38)                    |                         | 71 (4.71)            | 173 (3.02)                   |                         |
| <b>Coronary artery disease</b> |                      |                              | 0.07654                 |                      |                              | 0.07737                 |                      |                              | 0.08244                 |
| No                             | 2379 (96.43)         | 9263 (97.72)                 |                         | 648 (97.01)          | 2495 (98.19)                 |                         | 1462 (96.89)         | 5617 (98.16)                 |                         |
| Yes                            | 88 (3.57)            | 216 (2.28)                   |                         | 20 (2.99)            | 46 (1.81)                    |                         | 47 (3.11)            | 105 (1.84)                   |                         |

**Supplement Table 3.** ICD-9 codes versus chart review diagnosis among outpatients with VV

| Code                                                        | No.  | Clinical diagnosis | No.  |
|-------------------------------------------------------------|------|--------------------|------|
| <b>454.9 Asymptomatic varicose veins</b>                    | 1188 | VV                 | 1188 |
|                                                             |      | Others             | 0    |
| <b>454.1 With inflammation</b>                              | 775  | VV                 | 775  |
|                                                             |      | Others             | 0    |
| <b>454.0 Varicose veins of lower extremities With ulcer</b> | 152  | VV                 | 152  |
|                                                             |      | Others             | 0    |
| <b>454.2 With ulcer and inflammation</b>                    | 87   | VV                 | 87   |
|                                                             |      | Others             | 0    |

**Supplement Table 4.** ICD-9 codes-derived severity grading versus Clinical–  
Etiological–Anatomical–Pathophysiological (CEAP) stages of inpatients with VV

| Code                                                        | No. | CEAP stage | No. |
|-------------------------------------------------------------|-----|------------|-----|
| <b>454.9 Asymptomatic varicose veins</b>                    | 193 | C0-2       | 183 |
|                                                             |     | C3-4       | 6   |
|                                                             |     | C5-6       | 4   |
| <b>454.1 With inflammation</b>                              | 56  | C0-2       | 0   |
|                                                             |     | C3-4       | 56  |
|                                                             |     | C5-6       | 0   |
| <b>454.0 Varicose veins of lower extremities With ulcer</b> | 86  | C0-2       | 6   |
|                                                             |     | C3-4       | 0   |
|                                                             |     | C5-6       | 80  |
| <b>454.2 With ulcer and inflammation</b>                    | 12  |            |     |

|        | CEAP 0-2       | Not CEAP       |                |
|--------|----------------|----------------|----------------|
| Test + | 183            | 10             | 183/193 (94.8) |
| Test - | 6              | 136            | 136/142 (95.7) |
|        | 183/189 (96.8) | 136/146 (93.1) |                |

| Statistic                        | Estimate | 95% CI           |
|----------------------------------|----------|------------------|
| <b>Sensitivity</b>               | 96.83%   | 93.22% to 98.83% |
| <b>Specificity</b>               | 93.15 %  | 87.76% to 96.67% |
| <b>Positive Predictive Value</b> | 94.82%   | 90.95% to 97.08% |
| <b>Negative Predictive Value</b> | 95.77 %  | 91.15% to 98.03% |

|        | CEAP 3-4     | Not CEAP      |                |
|--------|--------------|---------------|----------------|
| Test + | 56           | 0             | 56/56 (100)    |
| Test - | 6            | 273           | 273/279 (97.8) |
|        | 56/62 (90.3) | 273/273 (100) |                |

| Statistic                        | Estimate | 95% CI            |
|----------------------------------|----------|-------------------|
| <b>Sensitivity</b>               | 90.32%   | 80.12% to 96.37%  |
| <b>Specificity</b>               | 100.00 % | 98.66% to 100.00% |
| <b>Positive Predictive Value</b> | 100.00%  |                   |
| <b>Negative Predictive Value</b> | 97.85 %  | 95.51% to 98.98%  |

|        |              |                |                |
|--------|--------------|----------------|----------------|
|        | CEAP 5-6     | Not CEAP       |                |
| Test + | 80           | 6              | 80/86 (93)     |
| Test - | 4            | 245            | 245/249 (98.4) |
|        | 80/84 (95.2) | 245/251 (97.6) |                |

| <b>Statistic</b>                 | <b>Estimate</b> | <b>95% CI</b>    |
|----------------------------------|-----------------|------------------|
| <b>Sensitivity</b>               | 95.24%          | 88.25% to 98.69% |
| <b>Specificity</b>               | 97.61 %         | 94.87% to 99.12% |
| <b>Positive Predictive Value</b> | 93.02%          | 85.79% to 96.71% |
| <b>Negative Predictive Value</b> | 98.39 %         | 95.92% to 99.38% |

**Supplement Table 5.** Sensitivity analysis of hazard ratio in patients with VV compared with the matched control cohort

|                                                                          | VV                           | Control    |
|--------------------------------------------------------------------------|------------------------------|------------|
| <b>History of pregnancy (ICD-9-CM : V22, V23.2, 761.5), N(%)</b>         | 169 (3.64)                   | 598 (3.37) |
| <b>Adjusted HR (95% CI); p-value<sup>2</sup></b>                         |                              |            |
| all-cause mortality as endpoint                                          | 1.37 (1.19, 1.57); < 0.0001  | Reference  |
| MACE as endpoint                                                         | 2.06 (1.89, 2.23); < 0.0001  | Reference  |
| <b>For Grade 3 and matched controls</b>                                  |                              |            |
| all-cause mortality as endpoint                                          | 1.84 (1.48, 2.28); < 0.0001  | Reference  |
| MACE as endpoint                                                         | 2.46 (2.14, 2.82); < 0.0001  | Reference  |
| <b>Myocardial infarction, stroke, coronary angioplasty or CABG, N(%)</b> | 19 (0.41)                    | 457 (2.58) |
| <b>Adjusted HR (95% CI); p-value<sup>3</sup></b>                         |                              |            |
| all-cause mortality as endpoint                                          | 1.36 (1.18, 1.57); < 0.0001  | Reference  |
| MACE as endpoint                                                         | 1.95 (1.8, 2.12); < 0.0001   | Reference  |
| <b>For Grade 3 and matched controls</b>                                  |                              |            |
| all-cause mortality as endpoint                                          | 1.84 (1.49, 2.28) ; < 0.0001 | Reference  |
| MACE as endpoint                                                         | 2.32 (2.02, 2.66); < 0.0001  | Reference  |

HR = Hazard Ratio; CI = Confidence Interval

2 Adjusted for history of pregnancy, age, gender, hypertension, diabetes, hyperlipidemia, coronary artery disease, chronic obstructive pulmonary disease, cancer, atrial fibrillation, heart failure, ischemic heart disease, chronic renal insufficiency

3 HR is calculated for population without history of Myocardial infarction, stroke, coronary angioplasty or CABG and the value is adjusted for age, gender, hypertension, diabetes, hyperlipidemia, coronary artery disease, chronic obstructive pulmonary disease, cancer, atrial fibrillation, heart failure, ischemic heart disease, chronic renal insufficiency
